# Supplementary material for: The expansion of tree plantations across tropical biomes
Source: Research Square preprint supplement (doi:10.21203/rs.3.rs-604751/v1), 2021-06-22
Supplement: Supplementary file 1 [file f87876f540787660220f82c8.docx]

The expansion of tree plantations across tropical biomes

Supplementary Materials

Matthew E. Fagan, Kim, Do-Hyung, Wesley Settle, Lexie Ferry, Justin Drew, Haven Carlson, Joshua Slaughter, Joshua Schaferbien, Alexandra Tyukavina, Nancy L. Harris, Elizabeth Goldman, and Elsa M. Ordway

Materials and Methods

### Definitions and Study Region

Following Hansen et al. (*1*), we define tree cover as all vegetation taller than 5m in height (i.e., all erect dicots and erect monocots). In Hansen et al. (*1*), areas of gain are defined as “a non-forest to forest change…related to percent tree crown cover densities >50%”. However, the term “forest gain” as used by Hansen et al. (*1*) includes both natural forest recovery and increases in tree plantation cover (*2*, *3*). In this study, we define “tree plantations” as parcels ≥0.45 ha in area composed of monocultures of agricultural or industrial tree species that are clearly established and managed by humans; this definition includes tree crops and pulp and timber plantations, but not mixed species agroforestry. By contrast, we define “natural regrowth”, “secondary forest”, or “natural regeneration” as parcels ≥0.45 ha in area with tree cover gain due to natural forest recovery (i.e. forests with a majority of non-agricultural or -industrial tree species).

### Forest gain patches

To facilitate analysis of this large dataset, each contiguous patch (queen connectivity) of forest gain pixels was converted into a vector polygon shapefile, and to further speed data processing, only one internal hole was retained for each gain polygon. This methodological choice potentially increased the occurrence of mixed polygons that contained both natural forest and tree plantations, but was necessary given data volumes. Preliminary analysis indicated that small vegetative patches (<5 pixels) often arose from ephemeral greening signals in otherwise unchanging tree cover. Adopting a minimum patch size of five pixels (0.45 ha) had the additional benefit of stabilizing estimates of within-patch variability in optical and SAR patch metrics (see below).

The patch persistence criteria, in addition to limiting the inclusion of ephemeral greening signals as regrowth, also updated the gain patch areas to the earliest available synthetic-aperture radar (SAR) Sentinel-1 data, in 2015. Potentially, we could have only removed disturbance occurring post-2012 through 2015. However we also removed forest loss in 2012 and 2016 respectively because both Hansen et al. (Figure S7 in (*1*)) and our preliminary analysis indicated that numerous forest loss events were mapped in subsequent or previous years (e.g., forest loss events in late 2015 were mapped as 2016 forest loss events, and 2012 forest loss included 2013 loss events). We were not able to remove forest loss prior to 2012 because the GFC data do not indicate the temporal order of tree cover gain and loss, or track gain after 2012, even though the version 1.7 update of the GFC data includes tree cover and loss to 2019 (https://earthenginepartners.appspot.com/science-2013-global-forest/download_v1.7.html).

In the first filtering step, all gain patches were set to the nominal year of 2015 by removing forest loss pixels between the years 2012 to 2016 (inclusive) from the patch area. Filtering by forest loss removed 11.3% of the original gain area. In the next step, all resulting loss-corrected patches below 0.45 ha (i.e., <5 pixels) in size (either originally, or due to removal of loss pixels) were removed from the dataset. Filtering by patch size removed 27.4% of the original gain area; after both filters, the area of the remaining gain patches was 61.3% of the original gain area.

Satellite data

The global Landsat spectral mosaics available from the GLAD lab (version 1.3) consist of imagery composites (Landsat 5/7/8; bands 3 (red), 4 (near infra-red), 5 (shortwave infra-red 1),7 (shortwave infra-red 2); 30 m spatial resolution) that have been processed for cloud filtering and radiometric normalization. To characterize spectral variability in the dataset (i.e., texture), we further calculated Shannon entropy (*4*) in Google Earth Engine for the near infra-red band, using a 9 x 9 pixel moving kernel.

PALSAR-2 is an L-band synthetic aperture radar (SAR) with dual polarization, two bands (HH and HH+HV (hereafter “HV”)), and a moderate-resolution pixel size (25 m). The processed 2015 global product hosted on Google Earth Engine (https://developers.google.com/earth-engine/datasets/catalog/JAXA_ALOS_PALSAR_YEARLY_SAR) has been corrected for SAR geometric distortion and slope corrected. Sentinel-1 is a C-band SAR constellation with dual polarization, four bands (VV, HH, VV+VH, and HH+HV), and a moderate-resolution pixel size (10 m) in the product hosted on Google Earth Engine (https://developers.google.com/earth-engine/datasets/catalog/COPERNICUS_S1_GRD), which has been radiometrically calibrated and terrain corrected. To limit data volumes and processing time, we selected the VV and VV+VH (hereafter “VH”) Sentinel-1 bands for further analysis, along with all of the PALSAR-2 data. To further characterize variability in both SAR datasets, we then calculated Shannon entropy (*4*) in Google Earth Engine for the HV (PalSAR-2) and VH (Sentinel-1) bands respectively, using a 9 x 9 pixel moving kernel.

Labeled training data

*Tree plantation reference data*

Tree plantation reference data came from two main sources: the World Resource Institute (WRI), and manual delineation of plantations. We downloaded two distinct sets of tree plantation reference data from WRI (*5*, *6*). The first set of WRI reference data consist of 264,950 polygons of different tree plantation species in 2014, covering seven tropical countries (Brazil, Indonesia, Malaysia, Cambodia, Columbia, Liberia, and Peru). Tree plantations were manually delineated by WRI in fine-resolution multispectral imagery and very high-resolution (VHR) imagery using considerations of color, shape and pattern (*5*). The tree plantation area mapped by this data was 45.8 million ha across seven countries. The categories of tree plantations delineated include oil palm, rubber, and numerous other species. The majority of polygons only had one species recorded, but species mixtures did occur in the original data. Plantations with an “unknown” species were eliminated from this training set, and only plantations with “large-scale” status were included for further analysis.

We then used the resulting tree plantation polygons to select all Hansen gain polygons that intersected their boundaries. This subset of the training dataset was further filtered for purity in initial machine learning analyses, with mislabeled gain patches dominated by natural regrowth removed from the training dataset. The second set of WRI tree plantation data was a set of vector files, derived from different sources of varying quality, including government datasets, hand-delineation from high-resolution imagery, and moderate-resolution land cover maps (*6*). This vector data was used as a guide for manual delineation of oil palm and rubber tree plantations in Vietnam and Laos (see Materials and Methods).

*Natural regrowth reference data*

Natural forest regrowth reference data was derived from three main sources: the Intact Forest Landscapes dataset (IFL; (*7*), the World Database on Protected Areas (WDPA v1.4; (*8*)), and manual delineation of natural regrowth. The IFL spatial database (scale 1:1,000,000) shows the extent of intact forest landscapes (i.e., landscapes lacking disturbance and/or nearby infrastructure) (IFL) for the year 2016. The IFL polygon dataset was used to directly select all intersecting Hansen gain polygons in these remote, undisturbed forests. The WDPA is a comprehensive spatial dataset of protected areas across the globe, including a variety of protection categories experiencing anthropogenic disturbance to different degrees. Prior to intersection with the gain data, several modifications to this data were conducted. First, selected protected area categories were omitted to reduce the chance of selecting tree plantations within these areas: UNESCO Man and Biosphere Reserves, Biosphere Reserves, Biological Corridors, Controlled Hunting Areas, and Forest Plantations. Second, to lower the impact of seasonal leaf phenology on the training data, only WPDA polygons that intersected the tropical moist broadleaf forest biome (*9*) were selected. Second, the selected WDPA polygons were buffered inwards by 1 km to exclude agriculture and tree plantations commonly observed around the perimeter of designated protected areas. Fourth, the borders of all buffered WDPA polygons in the area of study (25° N to 25° S) were inspected, and if necessary, manually edited to omit intersecting tree plantation and agricultural gain patches.

WDPA polygon borders were inspected using the most recent freely available high-resolution imagery (Bing, Google Earth), and processed by the lead author in a grid search method to ensure inspection of all relevant protected areas. If their borders could not be easily re-drawn to exclude tree plantations or agriculture gain patches, the specific protected area was removed from the dataset. These edited, buffered WPDA polygons were then used to select all intersecting Hansen gain polygons.

Pre-processing and balancing the training data

Almost all gain patches reserved for testing data (93%) were omitted from the training data (see details below). Additionally, some gain patches in the training data were labeled as both natural regrowth and tree plantation in our dataset; these patches arose primarily from the occurrence of tree plantations within the interiors of protected areas. Any patches labeled as both classes were omitted from further analysis.

To balance the plantation training data, we first split it into two main groups: palms, and non-palms. The palm group (n= 214,897) included oil palm, coconut palm, and any uncommon plantation species mixtures dominated by either palm species. The non-palm group (n= 198,987) included all other plantation species (eucalyptus, pine, rubber, etc.). The natural regrowth training data (n=311,282) came primarily from protected areas (77%), with smaller contributions from manual delineation (18%) and intact forested landscapes (5%). For all of the training subgroups (palms, non-palms, and natural regrowth), we then randomly withheld 10% of the processed training data as internal validation data (n=72,908), and marked the remaining training samples for five-fold cross-validation for classification model development. Finally, we attempted to balance the plantation species composition in our training sample. Because rubber (*Hevea*) was so common in southeast Asia and relatively under-represented in our sample, we upsampled rubber reference data (sampling with replacement from existing data) to increase its proportion from 0.1% to 1% of the processed training data.

Given that the relative global proportion of plantation and regrowth was unknown, we created eleven different final training datasets through subsampling (Table S3). Balancing of the final training data ranged proportionally from 1:4 (regrowth:plantation) to 1:1, with the middle training sample (sample 6) a 1:3 ratio. Training samples were drawn from regrowth, palm plantations, and non-palm plantations; these three groups were sampled independently. The first six samples sampled 100% of each plantation group, then stepped down in increments of 10% for groups 7 through 11. Conversely, the last six samples included of 100% of natural regrowth, then stepped down in increments of 10% for groups 5 through 1 (Table S3).

Machine learning classification models

For each of the eleven different balancings of the training data, we fit five types of binary classification models (55 classification models in total). The five types of classification models were: 1) gradient boosting machines (GBM), 2) logistic general linear models (GLM), 3) Distributed Random Forest (DRF), 4) Extremely Randomized Trees (XRT), and 5) feed-forward deep-learning neural networks (DL). Gradient boosting machines for classification use an ensemble of weak learners (i.e., decision trees) in an iterative fashion to predict a binomial outcome, with each new tree seeking to minimize the cost loss function for the current ensemble by predicting the greatest errors (*10*). Logistic general linear models estimate a regression model for a variable following a binomial distribution. Both Distributed Random Forest and Extremely Randomized Trees use voting to summarize an ensemble of independent weak learners (decision trees) trained on subsets of the input data. In both model types, decision tree node splits are made on a random subset of variables. In Distributed Random Forest, the variable with the most discriminative threshold is selected as the node splitting rule, but in Extremely Random Trees, thresholds for each variable are selected at random, with the most discriminative random threshold selected (*11*). By contrast, the feed-forward Deep Learning model is based on a multi-layer neural network trained with stochastic gradient descent using back-propagation, with a number of potential hidden layers (*12*).

To facilitate grid searches for parameter values and conduct direct model inter-comparison, we used the H2O automated machine learning (h2o.autoML) algorithm with default values (*13*). The h2o.autoML algorithm tested multiple types of machine learning models sequentially, using a grid search to test different parameter settings within each model type. The algorithm continued to test new models until a designated time was exceeded. To increase time for grid parameter search for the deep-learning models, we ran additional autoML runs for just that model type. As part of the autoML algorithm, all candidate models (including multiple models of each model type) were ranked by their performance on cross-validated training data (fivefold cross-validation). Models were ranked using mean area under the receiver operating characteristic (ROC) curve (AUC; (*14*)). AUC measures the proportion of true positives (natural regrowth classified as natural regrowth) relative to false positives (natural regrowth classified as plantations) at different threshold settings. At the end of time for each autoML run, the most accurate model (highest AUC) for each model type was saved.

Masking and post-processing

Post-classification, we addressed two main quality issues in the final map. The first, errors in mangrove patches in southeast Asia, is described in more detail in the Materials and Methods. Given that the mangrove reclassification (see Materials and Methods) was done with a separate global product with distinct errors, reclassified mangrove gain patches were marked as “low” confidence classifications (see below).

Second, visual inspection of the final product indicated that a small proportion of gain patches were actually non-forest in 2015, even after subtracting GFC forest loss. This likely occurred either due to original misclassification error ((*1*); tropical biome gain commission error of 18.1%) or subsequent errors in detecting forest loss ((*1*); tropical biome loss omission error of 16.8%). These errors included green pastures, agricultural fields, open wetlands, flooded forests, and cleared regrowth and plantations.

Given the challenges inherent in predicting continuous tree cover at global scales, the consequent need to recreate gain patch boundaries to exclude low tree cover areas within a patch, and the relatively rarity of gain errors, we decided not to classify patches with low tree cover (<10%) as a separate land cover within our original classification models. Instead, we used user-derived thresholds in greenness and biomass to distinguish gain patches with very low tree cover as a separate third land use class, Open. Given potential for error across arid biomes (i.e., with seasonally low greenness), reclassified open gain patches were marked as “low” confidence classifications (see below).

Labeled testing reference data

We assessed the accuracy of the final map of regrowth types across the tropics (25° N and S), using randomly selected polygons (n=2000; Figure S2) sampled with respect to stratum weight (patch area), with replacement. Almost all sampled polygons were withheld from training data as testing data for model assessment, and thus most (93%) were not included in the training data input into the classification analysis. The exception was very large gain polygons (>107 ha), which were relatively rare but were included in the testing sample due to stratum-area weighting. Excluding these polygons from the training data would have dramatically lowered the number of large polygons used for training, by 16% overall. To address this potential confounding factor, we present our accuracy assessment in two ways: including very large polygons (n=2000) and without very large polygons (n=1578).

In each polygon, land use for the year 2015 was identified by two trained analysts using freely available high-resolution imagery (Google Earth, Bing, and ArcGIS Basemap). When high-resolution imagery was not available for the year 2015, the closest high-resolution image date in time, along with time series of Landsat true color reflectance, were used to infer land use in 2015; this occurred in 1% of samples and was more frequent in cloudy regions with extensive natural forest. When analysts disagreed on the land use in question (Table S5), additional imagery data was inspected and a final determination was made by the senior analyst (the lead author).

Accuracy assessment

For comparative purposes, we evaluated the accuracy of a recent Tropical Moist Forest (TMF) map (*15*) using our validation polygons (Table S9). We first reclassified their map to three land-use classes (forest, plantation, and open) following their subclass labels, then determined the proportion of each validation polygon occupied by pixels in each land-use class. Fractional pixel coverages were summed to determine the proportions of each land-use class in each polygon, and then we used our proportional cover definitions (Table S5) to determine the overall class predicted by the TMF map for each polygon (omitting polygons outside the TMF predicted area). We then summed prediction errors using a confusion matrix and calculated overall and class accuracies; due to processing time limitations, we were unable to calculate accuracy estimate standard errors following Pickens et al. (*16*).

Independent land-use sampling

To independently assess both the accuracy of the GFC gain product and the relative proportion of tree plantations and natural regrowth, we conducted a separate, visual analysis of land-use for the period 2000-2012 across the humid tropical biome. We selected the humid tropical biome as our focal biome because visually detecting tree regrowth in more seasonal, arid biomes is challenging using the limited sampling over time provided by high-resolution satellite imagery. We selected the period 2000-2012 to coincide with the GFC product, but we did not omit patches that were cleared between 2012 and 2015 because of the challenges in distinguishing short-term land-use change in cloudy regions. Land-use was assessed by two trained analysts at randomly located points (n=3000) for the year 2012 using freely-available high-resolution imagery (see above). Land-use was assessed at a point and, to allow for mixed Landsat pixels, within a 30 m radius of that point. If the land-use at or nearby a point consisted of tree cover, the analysts measured the distance to the nearest tree cover within 30 m and recorded the land-use there (tree plantation, forest, or nonforest). Trees were distinguished by the presence of shadows, and a forest definition of 10% tree cover was used to distinguish forest from nonforest cover.

If the land-use was plantation or forest, the analysts then assessed change over time in that area in two distinct approaches. First, they examined time-series of Landsat imagery in Google Earth Engine (top-of-the-Atmosphere Landsat 7 composites), focusing on the years of 2000, 2004, 2008, and 2012 (but examining all years). If a point intersected with an observed increase in greenness of at least nine pixels in size, it was marked as tree cover gain. Second, they examined time-series of available high-resolution imagery time-series (Google Earth Pro) and other high-resolution imagery. If a point intersected or was immediately adjacent (<30 m) to an observed increase in tree cover, it was marked as tree cover gain. In both cases, if tree cover gain was not detected at a point, analysts searched for gain within a 1 km radius, but tree cover gain detections >30 m from a point were of lower reliability and not further analyzed.

After generating the reference point data, the GFC gain prediction at each random point was extracted. The accuracy of the GFC product in predicting land-use at each point in the humid tropical biome was then evaluated using a confusion matrix. In addition, the relative abundance of tree plantations was calculated, for both the reference data and the GFC gain product.

Model uncertainty estimation

Although the stacked ensemble predictions of land use class were the primary and most accurate land-use prediction (*data not shown*), we explored simpler alternative prediction methods to quantify overall ensemble uncertainty. We calculated two alternative ensemble methods of predicting land-use class from the initial 55 input class likelihoods. The first alternative method was simple majority voting (bagging) by the 55 input class likelihoods, using >0.5 as a threshold likelihood for plantation prediction. The second alternative method was a weighted cross-model average of class likelihoods, with weights determined by the individual input model accuracy in classifying the labeled internal test data. Thus, models that had low predictive accuracy on the internal validation data were down-weighted in the overall average class likelihood, and vice versa. Final land use class predictions used 0.5 as a threshold likelihood for plantation class prediction.

We quantified uncertainty in ensemble model predictions through three distinct criteria, and summarized overall uncertainty using an ordinal ranking with three confidence ratings (Low, Medium, and High). The first criteria consisted of agreement between the random forest (RF) land use class prediction and two alternative methods of predicting land-use class from the initial 55 input class likelihoods. If the RF ensemble and the two alternative ensemble predictions did not all agree on the land use class at a polygon, then the model prediction was flagged as Low confidence. The second criteria was mentioned previously; models reclassified in mangroves or to open land uses were marked as Low confidence. The third and final criteria assessed model confidence in the three ensemble prediction methods, flagging polygons with 70% or less prediction confidence in any ensemble prediction as Medium confidence. For the RF ensemble prediction, >70% prediction confidence arises from the percentage of decision trees that voted for the same outcome. For the majority voting ensemble prediction, at least 70% of the 55 individual models had to vote for a given land use class. For the weighted average ensemble prediction, the mean model confidence (determined from internal cross validation) across the 55 input models had to be >70% for a predicted land use class (model confidence for natural regrowth was simply the inverse of model confidence for the plantation class).

If any polygon had one or more confidence rankings, it was flagged with the lowest possible rating. Polygons that passed all three criteria were flagged as High confidence. We further examined whether accuracy assessments excluding low or low to medium confidence predictions would have greater accuracy (Table S8). To evaluate spatial patterns in model uncertainty for the plantation and regrowth land-use classes, we calculated the average prediction confidence (High: 1, Medium: 0, Low: -1) for the plantation and regrowth classes, averaging across 1-degree square grid cells (Figure S3).

Country-level analysis

For each country, tree plantation area was calculated from reporting to the Forest Resources and Assessment (FRA) database (*17*), while tree crop area was derived from FAO statistics on permanent crop area (*18*). Permanent crops were defined as “land cultivated with crops that occupy the land for long periods and need not be replanted after each harvest, such as cocoa, coffee, and rubber. This category includes land under flowering shrubs, fruit trees, nut trees, and vines, but excludes land under trees grown for wood or timber.” Permanent crop area included several widely cultivated tree crop species (e.g., oil palm, rubber, and other plantation species), but also included several species that did not meet our definition of plantations (e.g., coffee agroforestry) or the Hansen et al. definition of tree height (<5 m; tea plantations).

Protected area analysis

Protected area data (boundary, location, and status) were derived from the 2018 World Database on Protected Areas (WDPA v1.4; (*8*)). We followed similar global studies (e.g., (*19*) and WDPA analysis guidelines (Protected Planet, https://www.protectedplanet.net/en/resources/calculating-protected-area-coverage) in preparing this dataset for analysis, differing from previous studies in two ways: 1) in permitting protected area overlap, and 2) in using the original data projection (WGS84) for area calculations, rather than a distorted Molleweide projection. First, we selected protected areas (PAs) from the WDPA that had a status of “designated”, “inscribed”, or “established”, and were not designated as UNESCO Man and Biosphere Reserves, Forest Plantations, or Biosphere Reserves with an IUCN protection category below Ia. Second, we excluded PAs represented as only a point in the database, retaining only protected areas with detailed geographies. Third, we restricted our analysis to tropical terrestrial areas by excluding marine PAs and by clipping protected area polygons within a bounding box extending from 25° N to 25° S. Fourth, we permitted double counting of overlapping PAs. Our preliminary analysis indicated only small differences in our results if we eliminated protected area overlap (<0.3% difference).

To examine how tree plantation expansion and natural forest recovery affected PAs across our study region, we quantified the area of plantation and regrowth located in three buffers: A) near but outside PAs (≤1 km from the border); B) just inside PAs (≤1 km from the border); and C) in the interior of PAs (>1 km from the border). We combined buffers B and C (all areas inside PAs) for further analysis. Of these three buffers, only the interior of PAs was regularly used as training data in this analysis, and therefore we might expect a strong bias towards prediction of natural regrowth in the interior buffer. However, if spatial autocorrelation is a strong driver of our land-use predictions (*20*), the likelihood of predictions of natural regrowth also might be biased upwards in the other two adjacent buffers. For this reason, our estimates of the extent of tree plantations in PAs can be regarded as conservative.

To limit the impact of misclassification error on estimates of plantation area within protected areas, we further restricted our analysis of plantation invasion into PAs. Only PAs containing >5 ha of plantation area were considered to be invaded by plantations; in our dataset, five hectares is the approximate estimated mean size of tree plantations in Africa. Protected areas with >50 ha of plantation area were considered to be heavily invaded. We then used high-resolution imagery (see above for methods) to manually inspect all protected areas with >5 ha of plantation expansion, and removed incorrectly predicted plantation polygons from the affected PA’s area estimate. Finally, to quantify the effect of human influence and accessibility on protected areas, we calculated the maximum human impact index (HII) (*21*) for each protected area. We then compared the degree of plantation invasion across PAs, comparing PAs in the top and bottom 50% of maximum HII scores. The protected area overlay analyses were done using the exactextractr R package (v. 0.5.1, (*22*)), weighted for partial HII pixel overlap.

Results

Accuracy assessment

Our full accuracy assessment confirmed overall high accuracy across all three continental regions (table S6). Plantations were overall the most accurately predicted class (global class producer’s accuracy of 92.2%), with the lowest accuracy in Africa (75.8% producer’s accuracy). Tree plantations were the least common in Africa, but relatively diverse across the continent in species and structure, and there was likely insufficient training data for different combinations of soil background and plantation structure. Natural regrowth was also classified quite accurately (global class producer’s accuracy of 88.9%), with the lowest accuracy in Asia (80.1% producer’s accuracy). The widespread occurrence of small tree farms intermixed with native tree elements (e.g., jungle rubber) in Asia was challenging for our classifier to discriminate, as were selectively logged and burnt forest patches. The classifier also struggled to discriminate plantations, with their uniform structure, from the uniform structure of riparian regrowth forests. In areas without sufficient training data, it was more likely to incorrectly predict even-aged riparian regrowth patches as tree plantations. In addition, the classifier was prone to over-predict natural forest in regions with insufficient training data and distinct plantation species or structures, such as India and Mexico. The open class was the least accurately predicted class (54.4% global producer’s accuracy), but it was a rare class that made up only a small proportion of the validation data. As such, confidence intervals for the open class are large, and its effect on our overall predictive ability is small.

Accuracy remained high for all classes when the largest gain patches were removed from the validation data, decreasing only slightly (-2% overall accuracy) for small patches (table S7). Many patches with only five Landsat pixels (the minimum mapping unit) were difficult to classify correctly, as the standard deviation was less informative than in larger patches. By contrast, examining only patches with Medium to High predictive confidence increased overall accuracy by +1% (table S8). Model predictive confidence varied widely across regions for tree plantations (figure S3), but confidence was relatively high and uniform for natural regrowth outside regions where plantations dominated tree cover gains (southeast Brazil, Sumatra, southern China). This likely reflects the spatial uniformity of the regrowth sample across protected areas and intact forest blocks, while the plantation sample was unbalanced across species and regions (table S2).

The comparative accuracy assessment of the TMF map product (*15*) revealed low overall accuracy (63.4%; Table S9). Globally, roughly 40% of all plantations were misclassified as natural regrowth in the TMF product. This s reflected in a pantropical user's accuracy for natural regrowth of 61.1%, and a corresponding pantropical producer's accuracy for plantations of 60.2%. This error was large across all three continental regions, with the least error in Asia (70.9% plantation producer’s accuracy) and higher error in Latin America (29.9% plantation producer’s accuracy) and Africa (19.2% plantation producer’s accuracy). The relatively lower error in Asia potentially arose from their incorporation of a high-quality, single-date global oil palm map derived from remote sensing (*23*). However the low overall accuracy in Asia and elsewhere likely arose from their dependence on a manually created plantation mask (*15*). In addition, the product often mis-predicted known natural forest locations as open areas (natural forest producer’s accuracy of 68.9%), which agrees with their reported accuracy for GFC gain polygons (see table S1 in (*15*)).

Country, Biome and Hotspot analysis

Most plantation expansion occurred within (92.8%) in designated biodiversity hotspots (figure S10), which cover much of the forested tropics outside the Congo Basin and Amazon rainforests. The concentration of plantation expansion in the Sundaland region is notable (59.9%), but so is the extent of expansion in two semi-arid hotspots (Cerrado, and Eastern Afromontane), which contain 11% of global plantations. Plantation expansion was more common near navigable waters (Figure S11; p<0.00001, Kruskal-Wallis ANOVA), and in areas with high human impact index (p<0.00001, Kruskal-Wallis ANOVA), likely reflecting both the dominance of plantations in coastal southeast Asia and the logistics of transporting plantation products by road.

A multiple linear regression indicated that both natural regrowth and plantation area were positively related to the area of an ecoregion, but had a more complex relationship with proportion of intact forest (Table S10, p<0.00001). When intact proportion was higher, regrowth area significantly increased, while plantation area significantly decreased (both p<0.00001). While this effect was small, it was not negligible given the log scale of the area response variable. The regression passed all standard diagnostic tests for residual normality and heteroscedasticity (p>0.05), and had good predictive ability R2=0.54). The specific regression variables were selected based on theoretical grounds, and the model presented in Table S10 had the lowest AIC in comparison to simpler models.

At the country scale, the area of tree plantations was largely concentrated in four countries, each with >4% of total global plantation area (Indonesia, Brazil, Malaysia, and China). All other countries had less than 2.5% of total global plantation area per country (table S11). In general, the expansion of tree plantations did not cover significant fractions of total country area, with the exception of Indonesia (2.7% of country area) and Malaysia (7.0% of country area). But tree plantation expansion was widespread, with at least 51 countries having > 10 square kilometers of plantation expansion during the time period of interest. Relative to FAO-reported increases in tree plantations and permanent crops from 2000 to 2010, our estimates of increases in tree plantation area are an underestimate of total plantation area (figure S12). But this underestimate arose in part due to the under-prediction of total gain area by the original Hansen et al. product (figure S12). The filtering of the gain product for minimum patch size and clearing also lowered the patch area available for reclassification, increasing the underestimate relative to FAO data. But despite the limited absolute agreement between these distinct datasets, it is clear that persistent confusion between agroforestry (e.g., cacao in West Africa) and natural forest results from biases in our model towards predicting natural forest, as do regions (e.g., India) that were under-represented in our training data. For the two countries with much higher plantation expansion than reported to the FAO (Brazil and Thailand), it is likely that rapid turnover in land cover within timber plantations increased estimates of expansion over time.

Land-use sampling assessment

Across the humid tropical biome, tree cover gain was only observed at 83 of 3000 randomly located points (2.8%). Given the relative rarity of tree cover gain, the agreement between our accuracy assessment of the GFC gain product (table s15) and the GFC’s reported tropical gain accuracy (see Table S5 in (*1*)) is striking. Our accuracy results, sampled at a higher density and across a more restricted region, are largely within their reported 95% confidence intervals. As expected, only 39.8% of reference gain points were detected by the GFC product.

Disaggregating the tree cover gain class into two subclases (tree plantations and natural regrowth), we found little difference in the accuracy of the GFC product in detecting these two types of tree cover change (producer’s accuracy of 40.5% (plantations) and 39.1% (natural regrowth) (table S15). Furthermore, the relative proportion of tree plantations was similar in the reference data (44.6%) and in the subset of points identified as GFC gain (45.5%). Although natural regrowth made up a slightly greater absolute percentage of the reference data points than tree plantations, in contrast to our mapped results, this likely arises from the lack of a minimum patch size or persistence criteria in this independent analysis.

References:

1. M. C. Hansen, P. V Potapov, R. Moore, M. Hancher, S. A. Turubanova, A. Tyukavina, D. Thau, S. V Stehman, S. J. Goetz, T. R. Loveland, A. Kommareddy, A. Egorov, L. Chini, C. O. Justice, J. R. G. Townshend, High-resolution global maps of 21st-century forest cover change. *Science (80-. ).* **342**, 850–3 (2013).

2. M. C. Hansen, P. V. Potapov, B. Margono, S. V. Stehman, S. A. Turubanova, A. Tyukavina, Response to Comment on “ High-resolution global maps of 21st-century forest cover change .” *Science (80-. ).* **344** (2014), doi:10.1126/science.1248817.

3. R. Tropek, J. Beck, P. Keil, Z. Musilová, Š. Irena, D. Storch, O. Sedláček, J. Beck, P. Keil, Z. Musilová, I. Šímová, D. Storch, Comment on “High-resolution global maps of 21st-century forest cover change.” *Sci.* . **344**, 981 (2014).

4. C. E. Shannon, A mathematical theory of communication. *Bell Syst. Tech. J.* **27**, 379–423 (1948).

5. R. Petersen, D. Aksenov, E. Esipova, E. D. Goldman, N. Harris, I. Kurakina, T. Loboda, A. Manisha, S. Sargent, V. Shevade, D. Aksenov, A. Manisha, E. Esipova, V. Shevade, T. Loboda, N. Kuksina, Mapping tree plantations with multispectral imagery: preliminary results for seven tropical countries. *World Resour. Institute, Washington, DC*, 1–18 (2016).

6. N. L. Harris, E. D. Goldman, S. Gibbes, “Spatial Database of Planted Trees (SDPT Version 1.0)” (Washington DC, 2019).

7. P. Potapov, M. C. Hansen, L. Laestadius, S. Turubanova, A. Yaroshenko, C. Thies, W. Smith, I. Zhuravleva, A. Komarova, S. Minnemeyer, E. Esipova, The last frontiers of wilderness: Tracking loss of intact forest landscapes from 2000 to 2013. *Sci. Adv.* **3**, e1600821 (2017).

8. UNEP-WCMC, “World Database on Protected Areas User Manual 1.4 (downloaded 10-18)” (Cambridge, UK., 2016).

9. D. M. Olson, E. Dinerstein, E. D. Wikramanayake, N. D. Burgess, G. V. N. Powell, E. C. Underwood, J. A. D’amico, I. Itoua, H. E. Strand, J. C. Morrison, Terrestrial Ecoregions of the World: A New Map of Life on Earth: A new global map of terrestrial ecoregions provides an innovative tool for conserving biodiversity. *Bioscience*. **51**, 933–938 (2001).

10. J. H. Friedman, Stochastic gradient boosting. *Comput. Stat. Data Anal.* **38**, 367–378 (2002).

11. P. Geurts, D. Ernst, L. Wehenkel, Extremely randomized trees. *Mach. Learn.* **63**, 3–42 (2006).

12. A. Candel, E. LeDell, “Deep Learning with H2O” (2021), (available at https://www.h2o.ai/resources/booklet/deep-learning-with-h2o/).

13. H2O, AutoML: Automatic Machine Learning (2020), (available at https://h2o-release.s3.amazonaws.com/h2o/rel-yau/5/docs-website/h2o-docs/automl.html).

14. J. Huang, C. X. Ling, Using AUC and accuracy in evaluating learning algorithms. *IEEE Trans. Knowl. Data Eng.* **17**, 299–310 (2005).

15. C. Vancutsem, F. Achard, J.-F. Pekel, G. Vieilledent, S. Carboni, D. Simonetti, J. Gallego, L. E. O. C. Aragão, R. Nasi, Long-term (1990–2019) monitoring of forest cover changes in the humid tropics. *Sci. Adv.* **7**, eabe1603 (2021).

16. A. H. Pickens, M. C. Hansen, M. Hancher, S. V Stehman, A. Tyukavina, P. Potapov, B. Marroquin, Z. Sherani, Mapping and sampling to characterize global inland water dynamics from 1999 to 2018 with full Landsat time-series. *Remote Sens. Environ.* **243**, 111792 (2020).

17. FAO, “Global Forest Resources Assessment 2020” (Rome, 2020).

18. FAO, FAOSTAT agricultural statistics database. (2019), (available at http://faostat.fao.org/site/291/default.aspx).

19. C. A. Runge, J. E. M. Watson, S. H. M. Butchart, J. O. Hanson, H. P. Possingham, R. A. Fuller, *Science (80-. ).*, in press, doi:10.1126/science.aac9180.

20. P. Ploton, F. Mortier, M. Réjou-Méchain, N. Barbier, N. Picard, V. Rossi, C. Dormann, G. Cornu, G. Viennois, N. Bayol, A. Lyapustin, S. Gourlet-Fleury, R. Pélissier, Spatial validation reveals poor predictive performance of large-scale ecological mapping models. *Nat. Commun.* **11**, 4540 (2020).

21. O. Venter, E. W. Sanderson, A. Magrach, J. R. Allan, J. Beher, K. R. Jones, H. P. Possingham, W. F. Laurance, P. Wood, B. M. Fekete, M. A. Levy, J. E. M. Watson, Global terrestrial Human Footprint maps for 1993 and 2009. *Sci. Data*. **3**, 160067 (2016).

22. Daniel Baston, exactextractr: Fast Extraction from Raster Datasets using Polygons (2020), (available at https://cran.r-project.org/package=exactextractr).

23. A. Descals, S. Wich, E. Meijaard, D. L. A. Gaveau, S. Peedell, Z. Szantoi, High-resolution global map of smallholder and industrial closed-canopy oil palm plantations. *Earth Syst. Sci. Data*. **13**, 1211–1231 (2021).

24. T. Brambor, W. R. Clark, M. Golder, Understanding Interaction Models: Improving Empirical Analyses. *Polit. Anal.* **14**, 63–82 (2006).


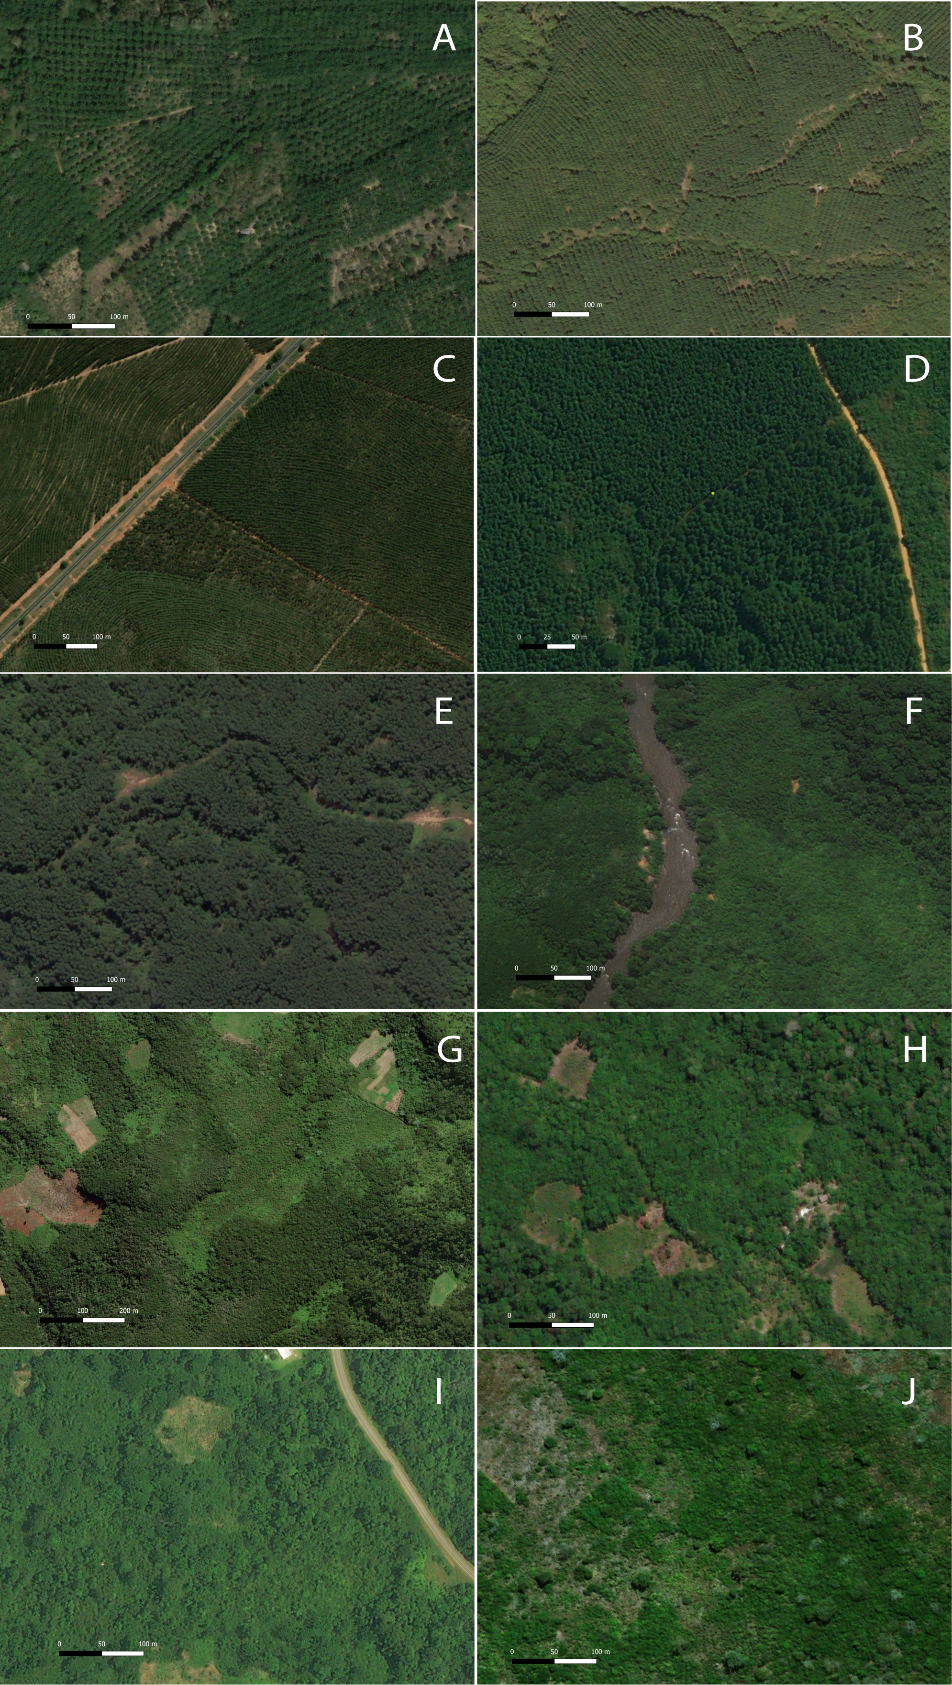


Fig. S1.

High-resolution images (Bing) inside protected areas, showing the most common plantation species and examples of natural regrowth. Plantation species include A) oil palm, B) rubber, C) eucalyptus, D) pine, and E) acacia. Natural regrowth examples include samples from F) Indonesia, G) southeast Brazil, H) eastern Peru, I) Gabon, and J) Mozambique.


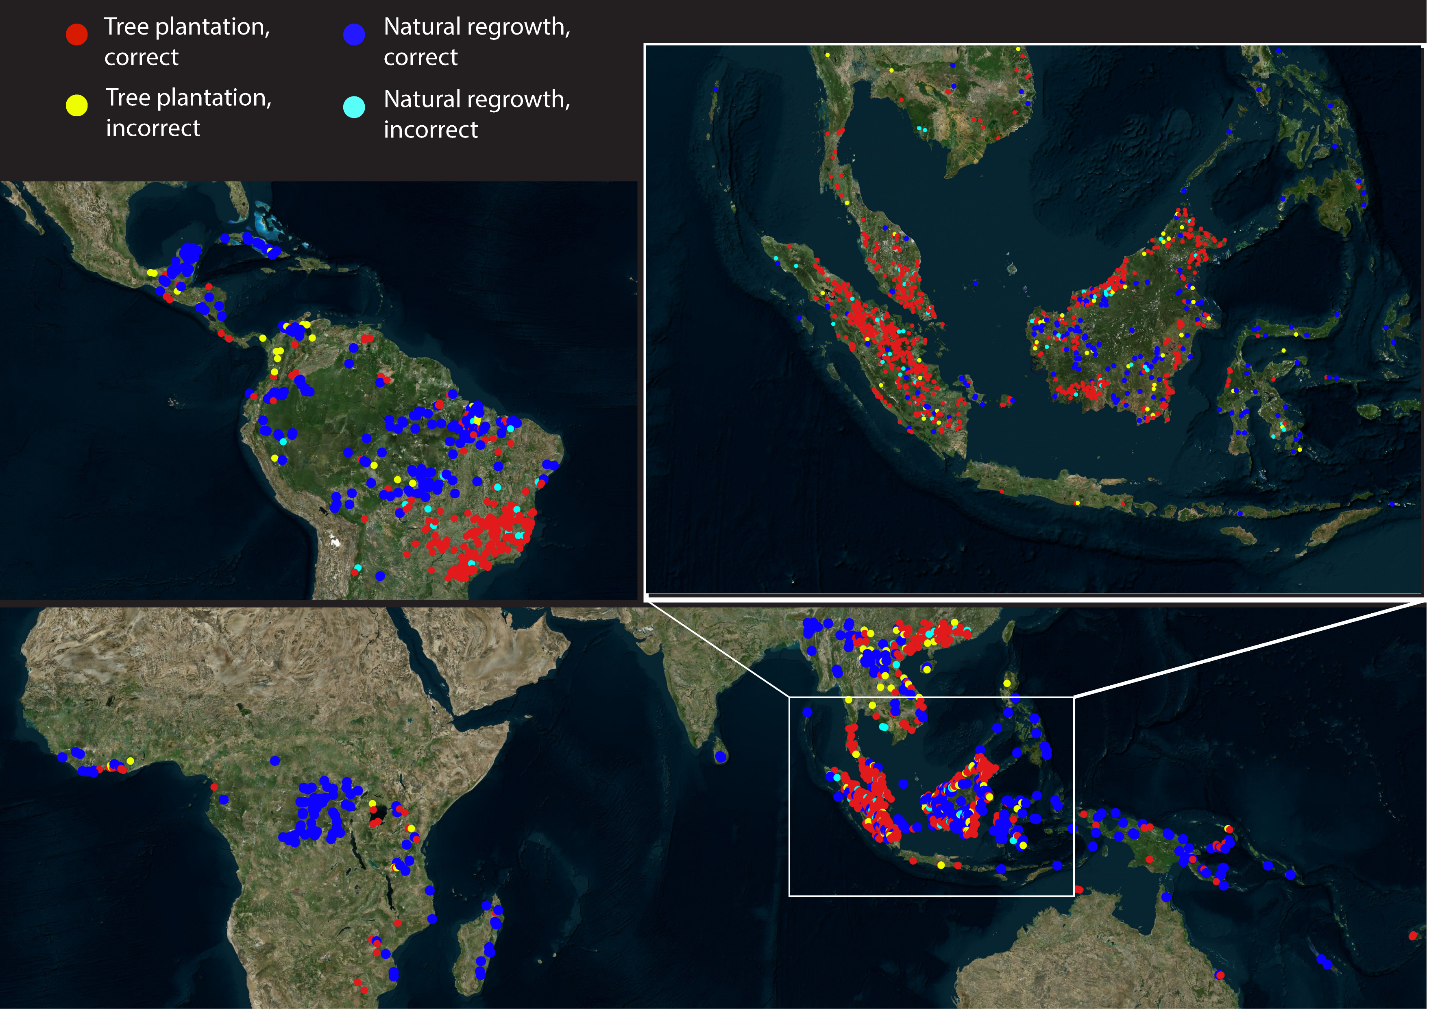


Fig. S2.

Distribution of correct and incorrect predictions in the independent validation data (n=2000). Each dot represents one validation polygon, and the color-coding indicates whether the true land-use (tree plantation or natural regrowth) was correctly predicted by our final classification model.


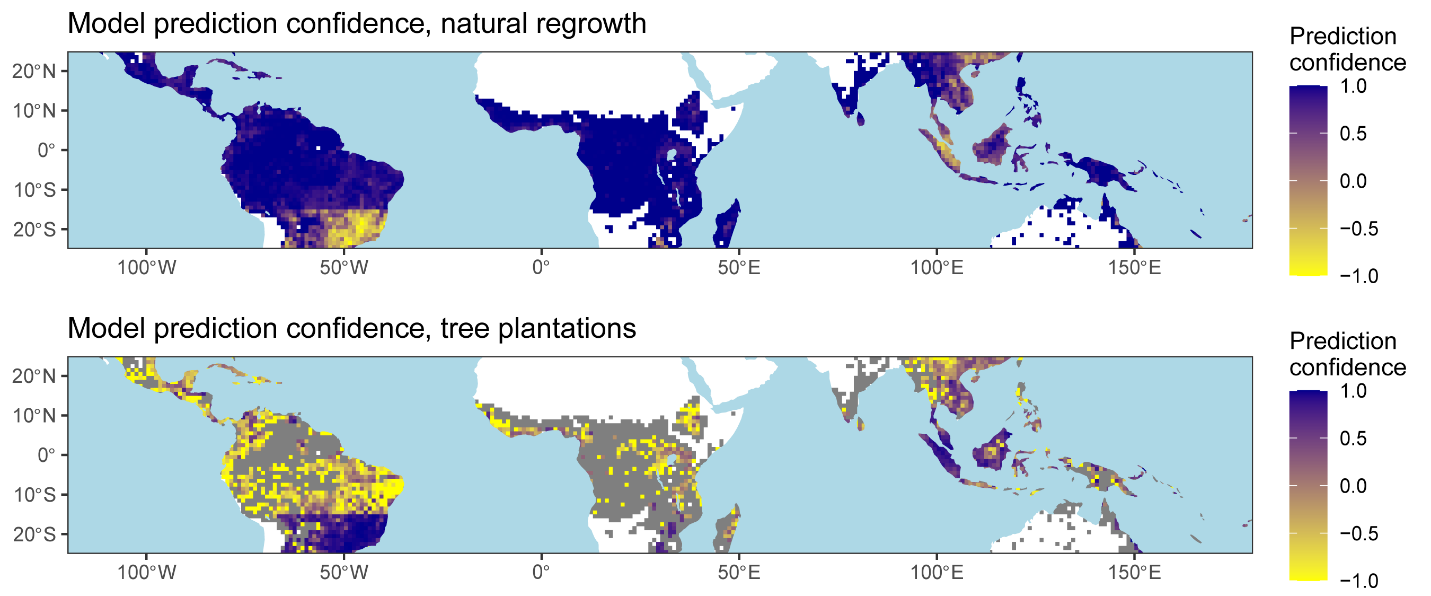


Fig. S3.

Spatial distribution of model prediction confidence for the two land-use classes, on an ordinal scale (High confidence = 1, Medium confidence = 0, Low confidence = -1). The mapped confidence rankings were averaged across all classified gain patches located within square bins one degree in width.


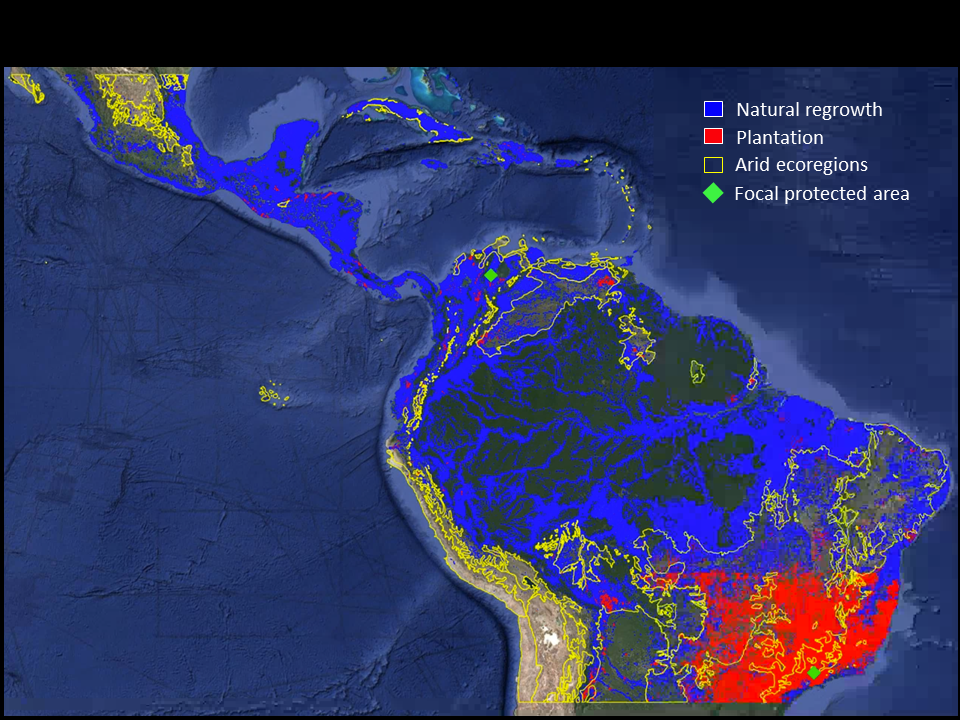


Fig. S4

Continental-level distribution of the plantation and regrowth data across Latin America. Tree plantation and regrowth patch outlines are shown, and thus the intensity of colors is not indicative of overall or relative abundance (see Figure 1 for abundance). Green diamonds mark the locations of focal insets over protected areas (see figure S5).


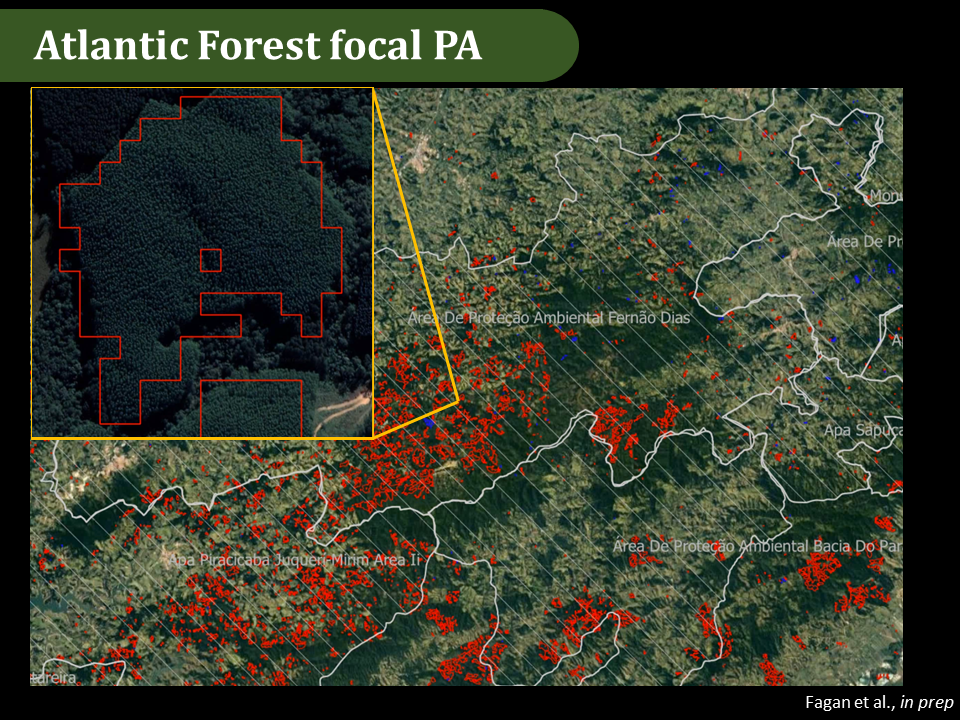


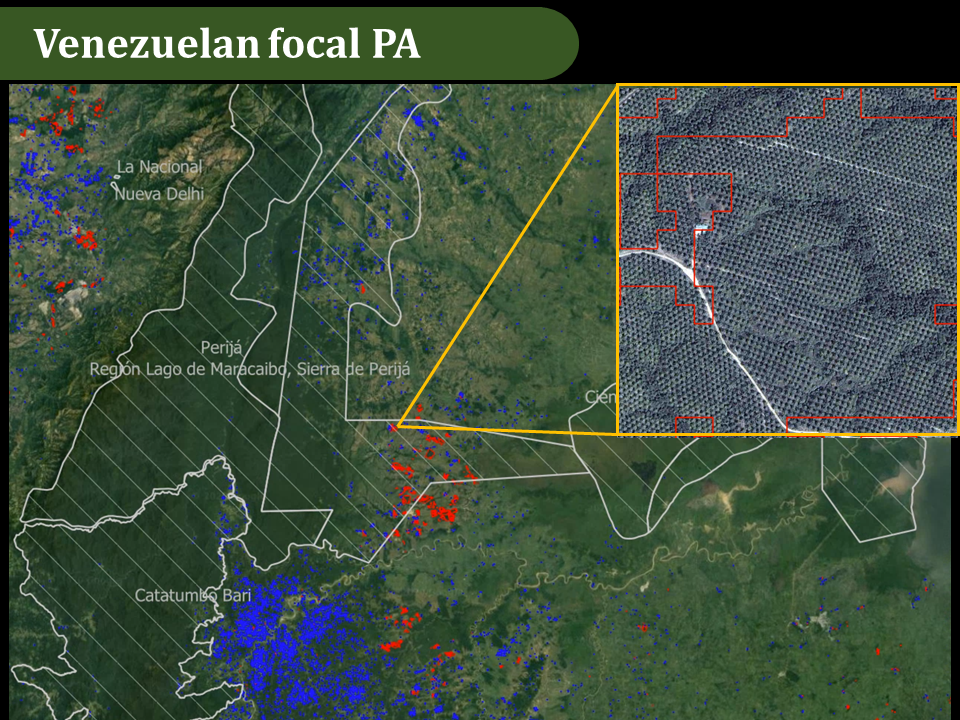


Fig. S5

Focal protected areas in Latin America where tree plantation expansion occurred from 2000 to 2012, shown at two scales over high-resolution Bing imagery. Patch outlines are shown for tree cover gain, color-coded by land-use (red outline: tree plantation; blue outline: natural regrowth). Protected areas are indicated by white outlines and crosshatching, and are labeled. Figure A shows pine plantation expansion inside a protected area in southeast Brazil. Figure B shows oil palm plantation expansion inside a protected area in Venezuela.


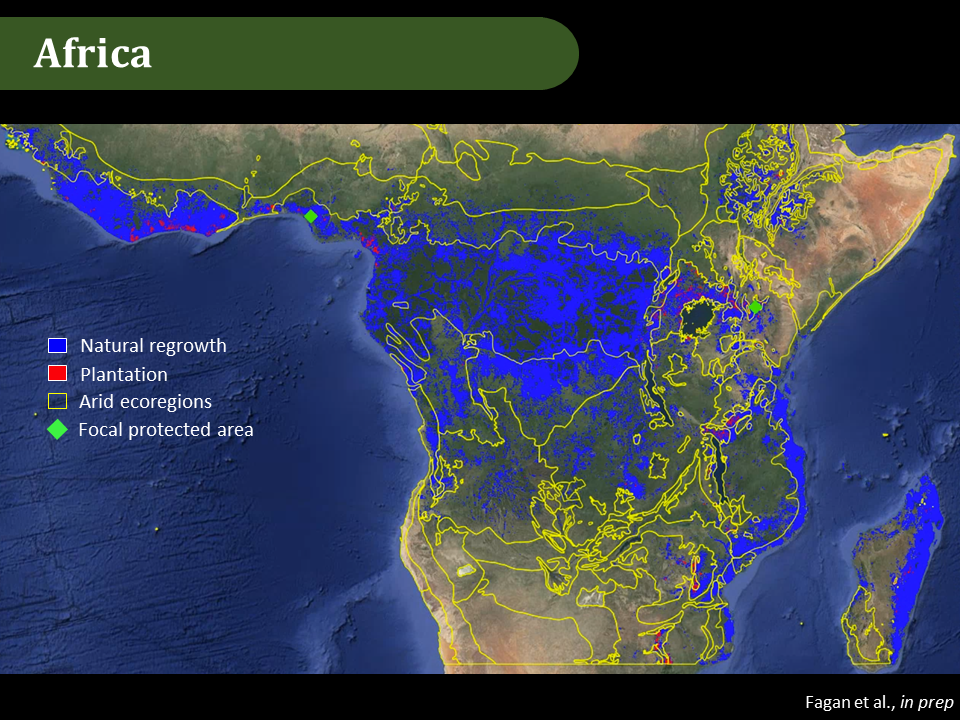


Fig. S6

Continental-level distribution of the plantation and regrowth data across Africa. Tree plantation and regrowth patch outlines are shown, and the intensity of colors is not indicative of overall or relative abundance (see Figure 1 for abundance). Green diamonds mark the locations of focal insets over protected areas (see figure S7).


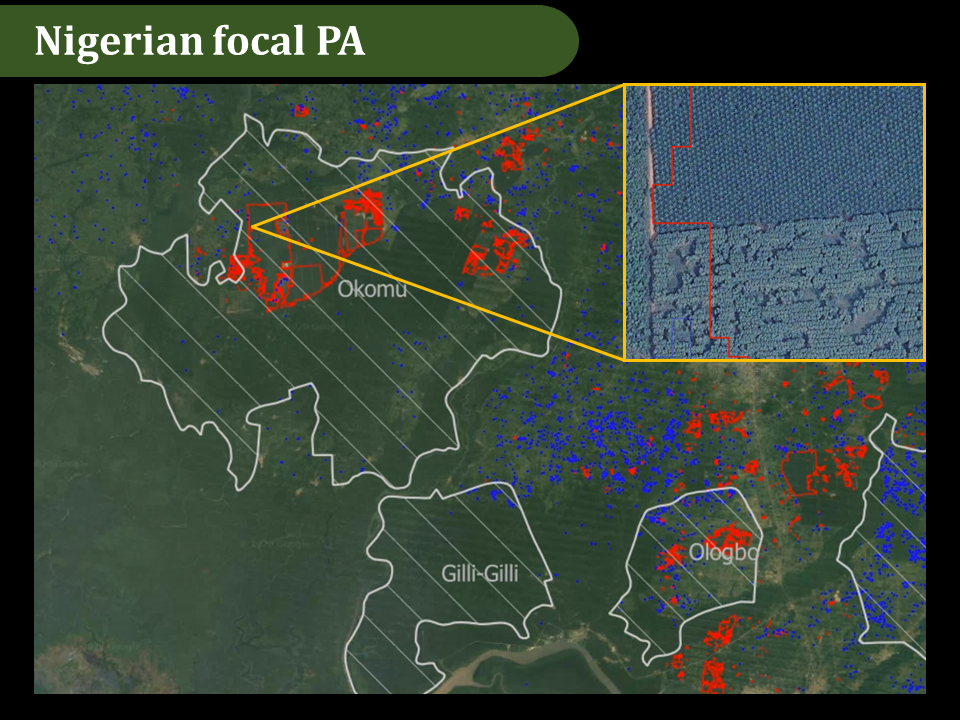

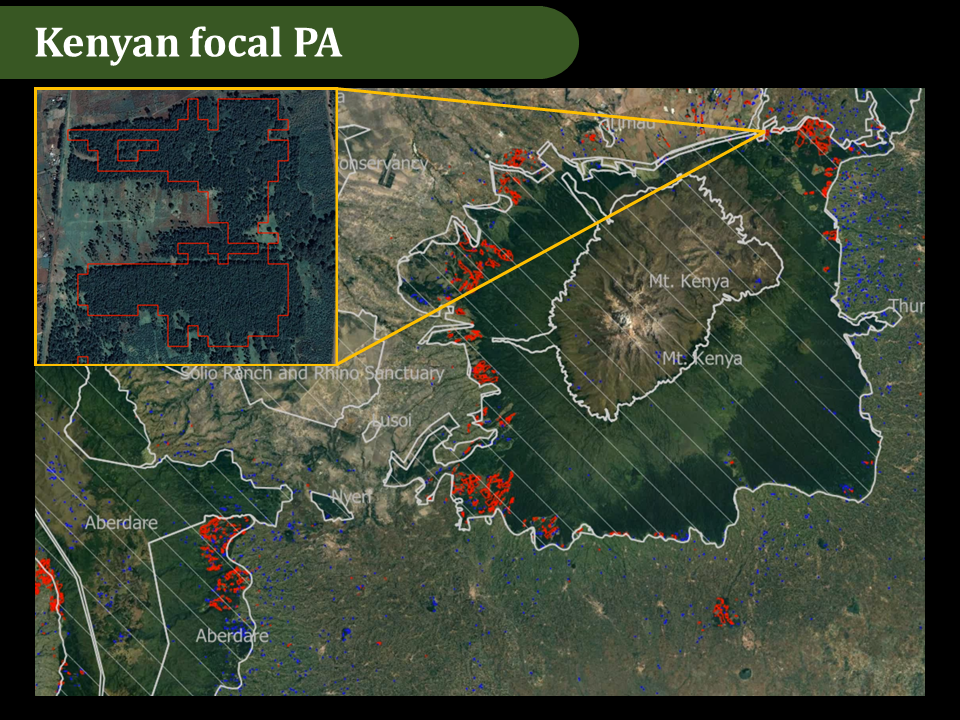


Fig. S7

Focal protected areas in Africa where tree plantation expansion occurred from 2000 to 2012, shown at two scales over high-resolution Bing imagery. Patch outlines are shown for tree cover gain, color-coded by land-use (red outline: tree plantation; blue outline: natural regrowth). Protected areas are indicated by white outlines and crosshatching, and are labeled. Figure A shows rubber and oil palm plantation expansion inside a protected area in Nigeria. Figure B shows tree plantation expansion (species unknown) inside a protected area in Kenya.


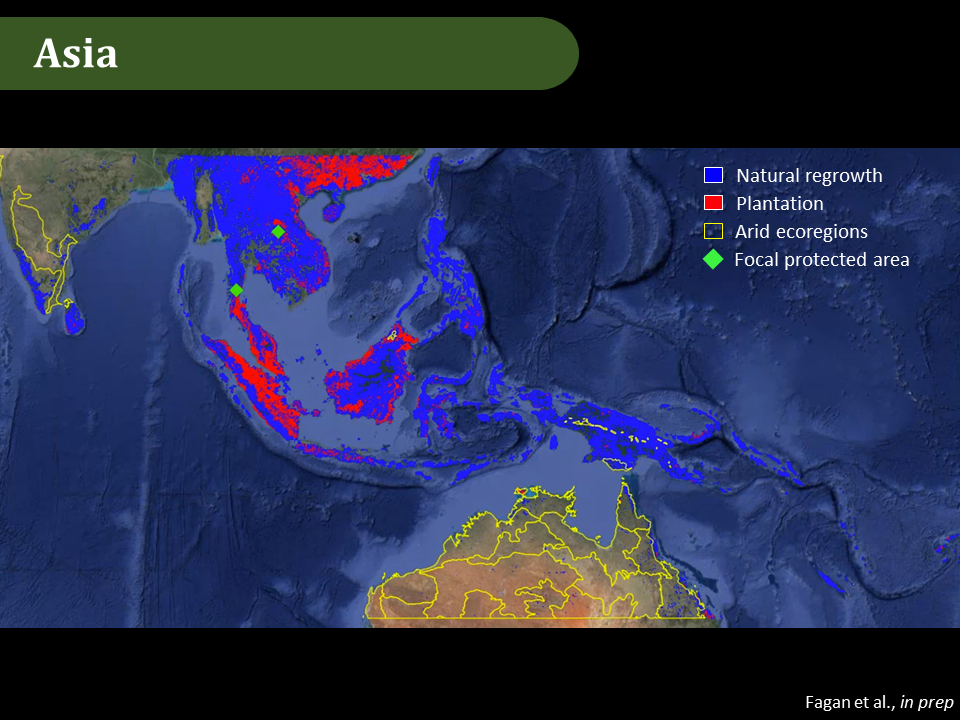


Fig. S8

Continental-level distribution of the plantation and regrowth data across Asia. Tree plantation and regrowth patch outlines are shown, and the intensity of colors is not indicative of overall or relative abundance (see Figure 1 for abundance). Green diamonds mark the locations of focal insets over protected areas (see figure S9).


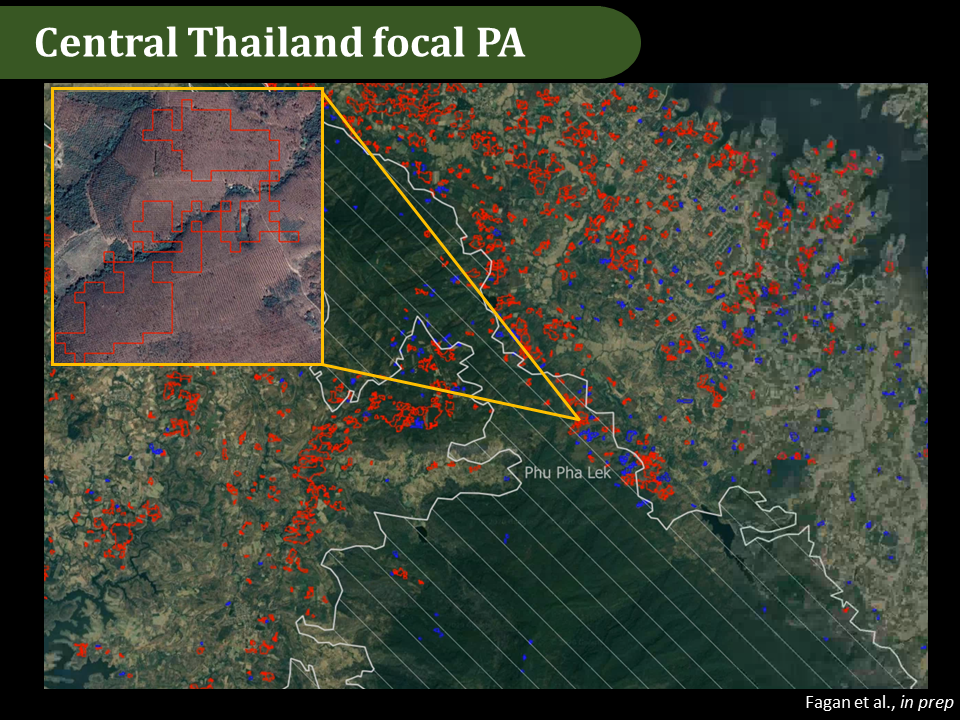

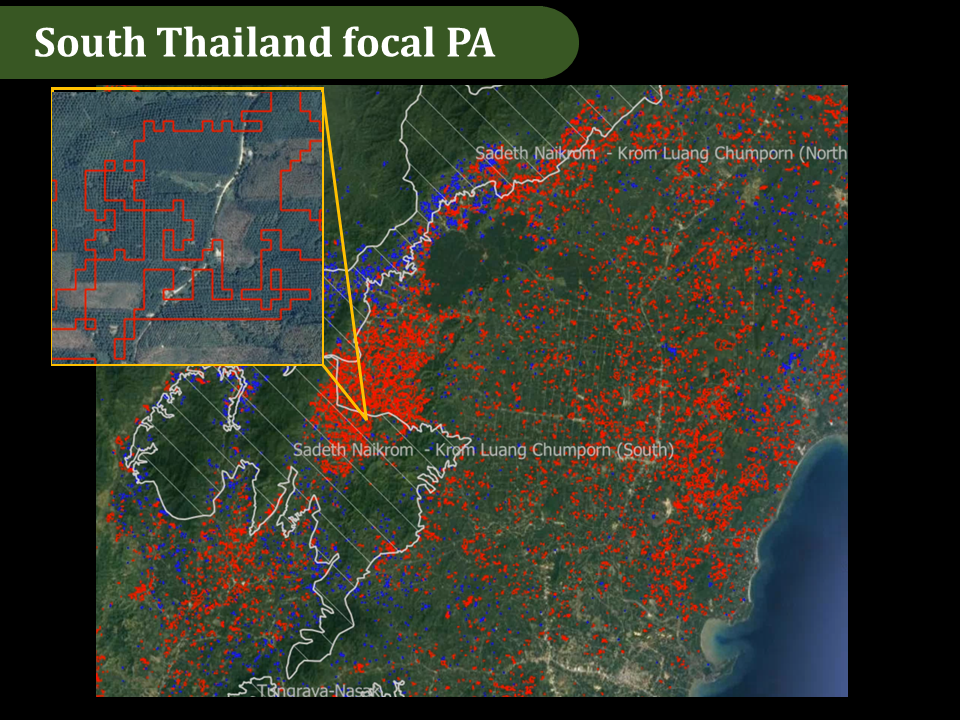


Fig. S9

Focal protected areas in Asia where tree plantation expansion occurred from 2000 to 2012, shown at two scales over high-resolution Bing imagery. Patch outlines are shown for tree cover gain, color-coded by land-use (red outline: tree plantation; blue outline: natural regrowth). Protected areas are indicated by white outlines and crosshatching, and are labeled. Figure A shows oil palm plantation expansion inside a protected area in southern Thailand. Figure B shows rubber plantation expansion inside a protected area in eastern Thailand.


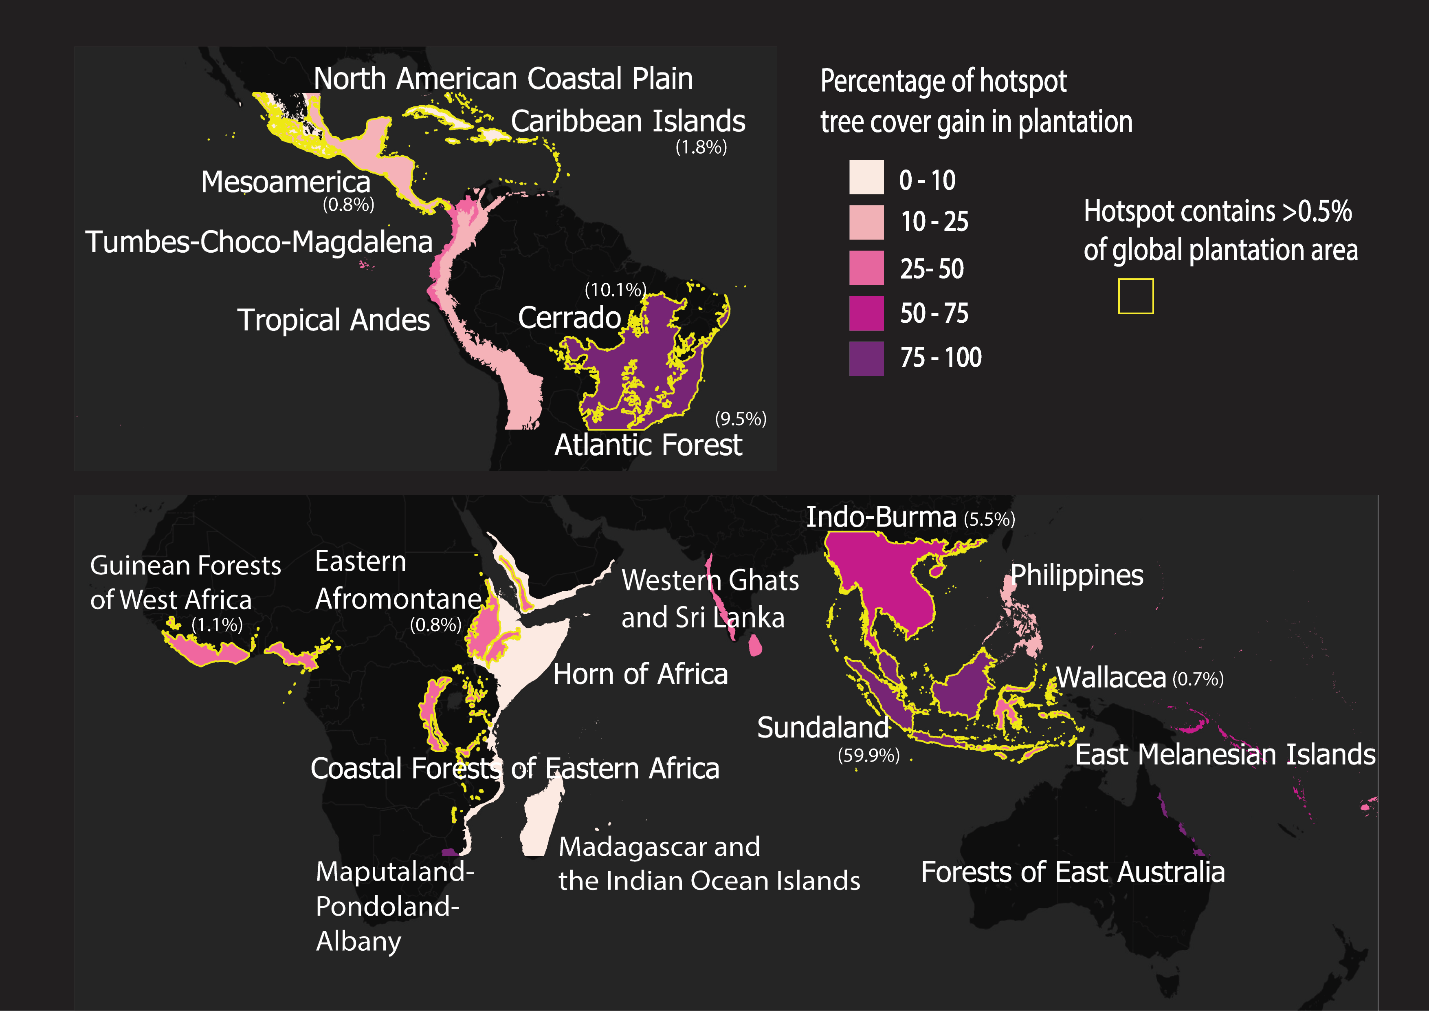


Fig. S10.

Distribution of plantations by biodiversity hotspot. All tropical hotspots are labeled, and hotspots are color-coded by the proportion of all tree cover gains in that hotspot that consist of plantations. The yellow outlines highlight hotspots that contain more than 0.5% of global plantation area; the exact percentage of global plantation area is included next to the hotspot names in parentheses.


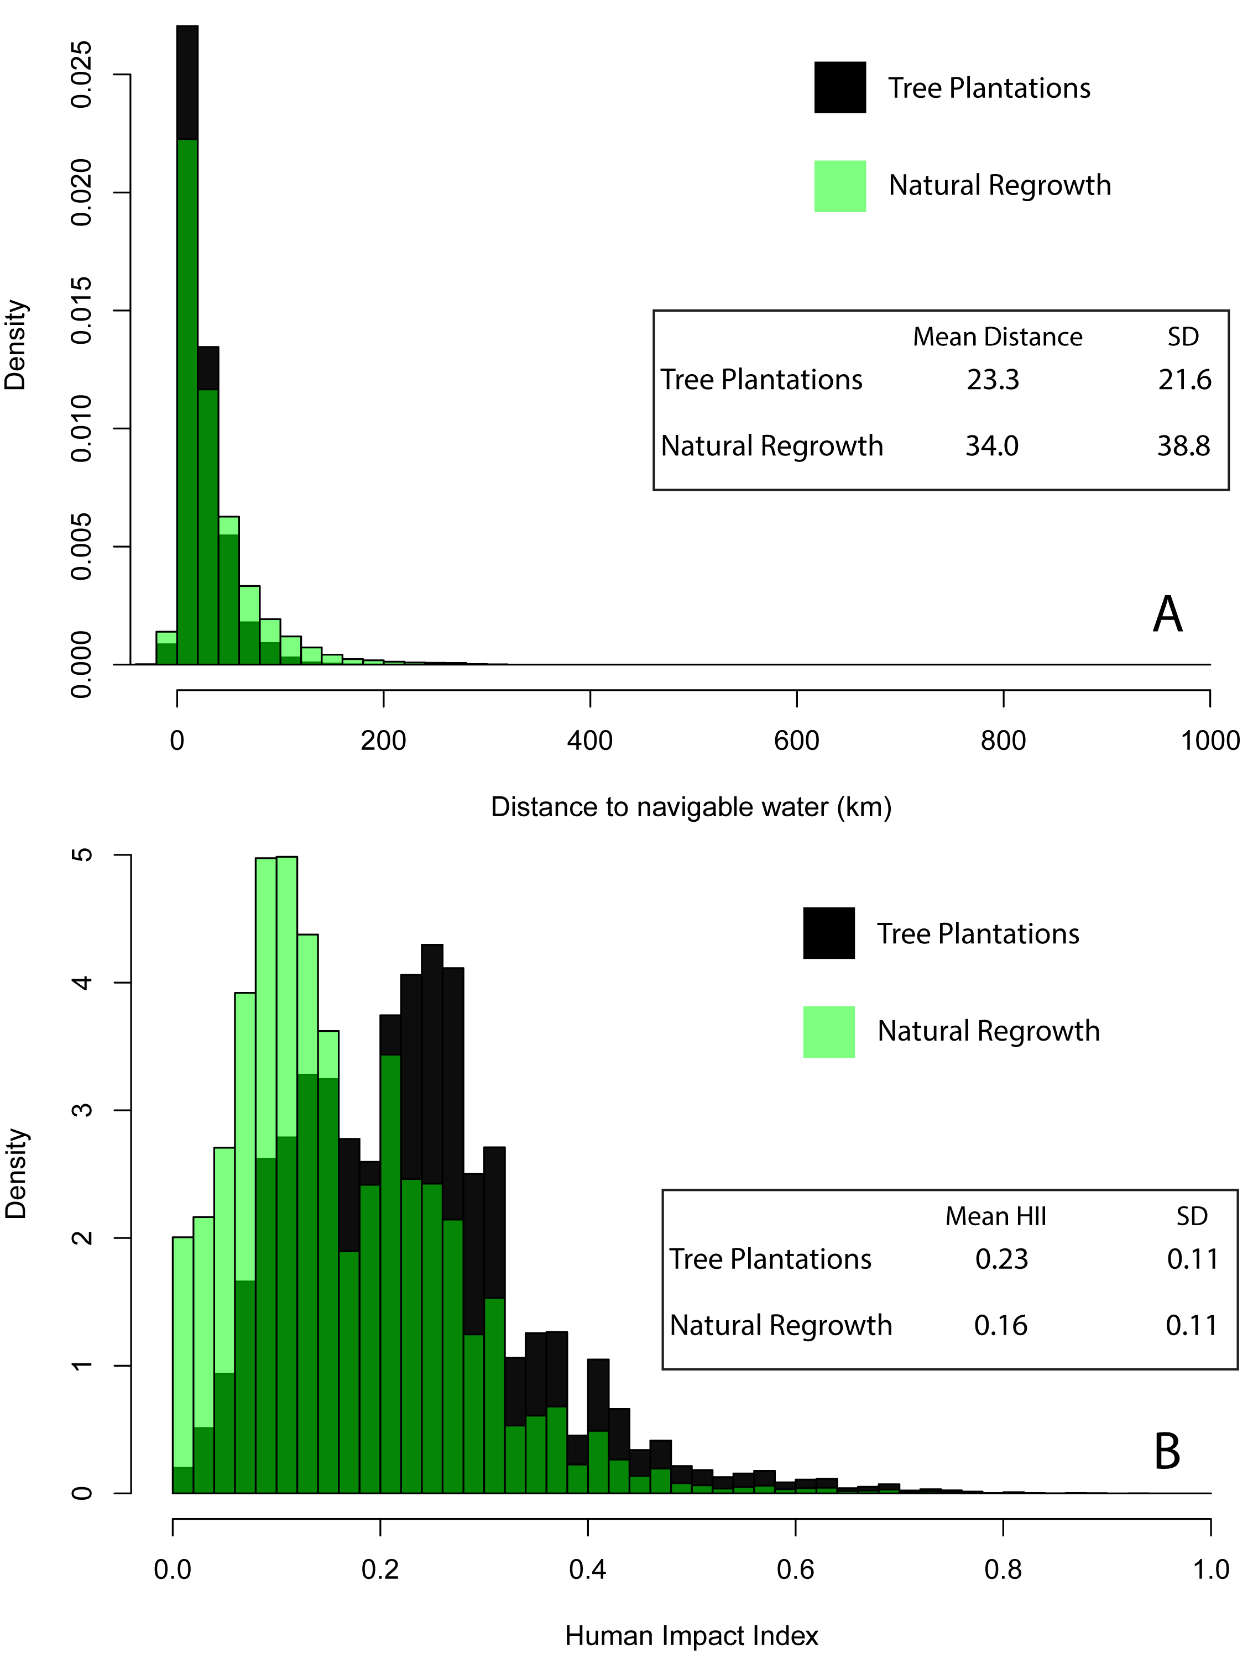


Fig. S11.

Distribution of plantations and natural regrowth polygons across gradients of distance to navigable water (A) and human impact index (HII) (B). Dark green indicates overlap between the two distributions.


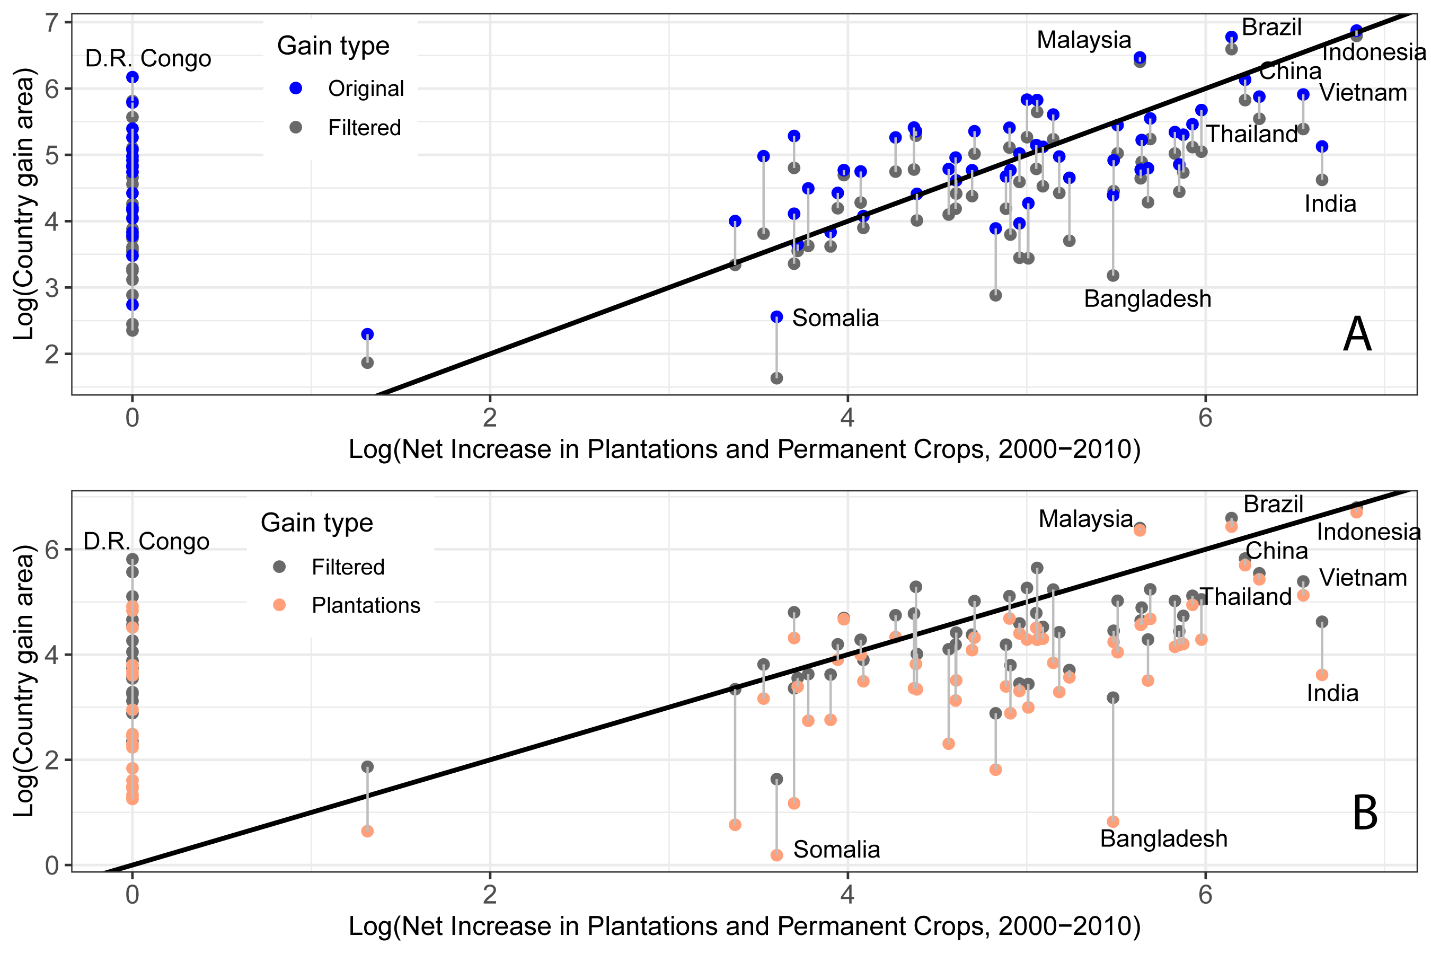


Fig. S12.

Plots comparing estimated gain area for each country (2000-2012) and FAO-reported country-level increases in tree plantations and permanent crops (2000-2010). The black line denotes a potential 1:1 fit between variables. Plot A shows the total country area of tree cover gain predicted by the Hansen et al. (2013) paper (‘Original”) and the loss- and MMU-filtered gain area used in our student (“Filtered”). Plot B shows the total country area of tree cover gain used in our analysis (“Filtered”) and the country area of plantations (“Plantations”), connected by grey lines. All area data were log-transformed (base 10), and countries with net negative declines in FAO-reported tree plantations and permanent crops were set to zero for visualization.

| **Variable** | **Patch-level summary** | **Resolution (m)** | **Source** |
| --- | --- | --- | --- |
| Landsat imagery composite |  | 30 | GFC satellite imagery |
| Band 3 (Red) | Mean, SD |  |  |
| Band 4 (NIR) | Mean, SD |  |  |
| Band 5 (SWIR) | Mean, SD |  |  |
| Band 7 (SWIR) | Mean, SD |  |  |
| GFC tree canopy cover, 2000 | Mean, SD | 30 | GFC product |
| GFC gain (2000-2012)* | Mean | 30 | GFC product |
| GFC loss year (2000-2015) | Mean, SD | 30 | GFC product |
| Agricultural land cover | Mean, SD | 1000 | GFSAD1000 on GEE |
| ALOS PALSAR |  |  |  |
| HH, HV, HV entropy | Mean, SD | 25 | JAXA mosaic on GEE |
| Sentinel-1 (median composite)  VV, VH, VH entropy | Mean, SD | 10 | ESA imagery on GEE |
| *Patch area* | Sum | Patch | Measured |
| *Patch perimeter length* | Sum | Patch | Measured |
| *Perimeter:area ratio* | Ratio | Patch | Calculated |
| *Patch compactness metric* | Ratio | Patch | Calculated |
| *Proximity to high P:A ratio patches* | Sum | Patch | Calculated |
| *Proximity to highly compact patches* | Sum | Patch | Calculated |
| *Continent* | Factor | Patch | Grouped by longitude |

Table S1.

Patch-level variables used for machine learning. Unless otherwise noted, all variables were derived from available data for the year 2015. In the table, the following abbreviations are used: SD (standard deviation) GFC (Global Forest Change), JAXA (Japanese Aerospace Exploration Agency), GEE (Google Earth Engine), and ESA (European Space Agency). GFC gain was included only as a quality check variable, with a uniform value of 1. All variables not derived from remote sensing are in italics. There were three continent groups: Latin America, Africa, and Australasia (Asia including northern Australia and Oceania).

| **Group** | **Species/Type** | **Sample size (N)** | | | |
| --- | --- | --- | --- | --- | --- |
|  |  | **Africa** | **Asia** | **Latin America** | **Total** |
| Natural regrowth | Natural regrowth | 66,111 | 114,889 | 129,917 |  |
|  |  |  |  |  | **323,091** |
| Oil palms | Oil palm | 1,241 | 208,072 | 2,867 |  |
|  | Palms | 4 | 130 | 1,513 |  |
|  | Palms, fruit | 0 | 0 | 1,234 |  |
|  | Oil palm, mixture | 0 | 2,465 | 0 |  |
|  | Coconut palm | 44 | 99 | 0 |  |
|  | Coconut palm, mixture | 0 | 0 | 38 |  |
|  |  |  |  |  | **217,707** |
| Other plantations | Acacia | 0 | 21,955 | 285 |  |
|  | Acacia, mixture | 0 | 3,660 | 0 |  |
|  | Araucaria | 0 | 0 | 16 |  |
|  | Bamboo | 0 | 0 | 4 |  |
|  | Banana | 0 | 0 | 915 |  |
|  | Cacao | 0 | 9 | 0 |  |
|  | Cashew | 0 | 0 | 282 |  |
|  | Coffee | 0 | 32 | 987 |  |
|  | Eucalyptus | 0 | 911 | 128,400 |  |
|  | Fruit | 0 | 381 | 94 |  |
|  | Pine/Conifer | 0 | 1,521 | 23,758 |  |
|  | Hevea | 0 | 552 | 441 |  |
|  | Teak | 0 | 89 | 0 |  |
|  | Other (unknown) | 2,852 | 8,009 | 1,562 |  |
|  |  |  |  |  | **196,715** |

Table S2.

Count of plantation and regrowth training data numbers by continent and by species/type. Common names of species are indicated where they are known, otherwise labels are by type (e.g., Fruit plantations). If more than one species is indicated, the dominant species is first. Mixtures were comprised of more than one plantation species. Other “unknown” plantations were not palms, but of otherwise unknown plantation species.

| Training sample | Land-use | Percent maximum sample | Proportion of training | Sample size (n) | **Total sample size (N)** |
| --- | --- | --- | --- | --- | --- |
| 1 | Natural Regrowth | 50 | 0.20 | 139,895 |  |
| 1 | Oil Palms | 100 | 0.40 | 279,790 |  |
| 1 | Other plantations | 100 | 0.40 | 279,790 | **699,475** |
| 2 | Natural Regrowth | 60 | 0.23 | 167,874 |  |
| 2 | Oil Palms | 100 | 0.38 | 279,790 |  |
| 2 | Other plantations | 100 | 0.38 | 279,790 | **727,454** |
| 3 | Natural Regrowth | 70 | 0.26 | 195853 |  |
| 3 | Oil Palms | 100 | 0.37 | 279,790 |  |
| 3 | Other plantations | 100 | 0.37 | 279,790 | **755,433** |
| 4 | Natural Regrowth | 80 | 0.29 | 223,832 |  |
| 4 | Oil Palms | 100 | 0.36 | 279,790 |  |
| 4 | Other plantations | 100 | 0.36 | 279,790 | **783,412** |
| 5 | Natural Regrowth | 90 | 0.31 | 251,811 |  |
| 5 | Oil Palms | 100 | 0.34 | 279,790 |  |
| 5 | Other plantations | 100 | 0.34 | 279,790 | **811,391** |
| 6 | Natural Regrowth | 100 | 0.33 | 279,790 |  |
| 6 | Oil Palms | 100 | 0.33 | 279,790 |  |
| 6 | Other plantations | 100 | 0.33 | 279,790 | **839,370** |
| 7 | Natural Regrowth | 100 | 0.36 | 279,790 |  |
| 7 | Oil Palms | 90 | 0.32 | 251,811 |  |
| 7 | Other plantations | 90 | 0.32 | 251,811 | **783,412** |
| 8 | Natural Regrowth | 100 | 0.38 | 279,790 |  |
| 8 | Oil Palms | 80 | 0.31 | 223,832 |  |
| 8 | Other plantations | 80 | 0.31 | 223,832 | **727,454** |
| 9 | Natural Regrowth | 100 | 0.42 | 279,790 |  |
| 9 | Oil Palms | 70 | 0.29 | 195,853 |  |
| 9 | Other plantations | 70 | 0.29 | 195,853 | **671,496** |
| 10 | Natural Regrowth | 100 | 0.45 | 279,790 |  |
| 10 | Oil Palms | 60 | 0.27 | 167,874 |  |
| 10 | Other plantations | 60 | 0.27 | 167,874 | **615,538** |
| 11 | Natural Regrowth | 100 | 0.50 | 279,790 |  |
| 11 | Oil Palms | 50 | 0.25 | 139,895 |  |
| 11 | Other plantations | 50 | 0.25 | 139,895 | **559,580** |

Table S3.

Proportion of data in each land use across the 11 different training samples. The maximum possible sample for any one class was the natural regrowth class size (n=279,790). If a class was below this sample size (e.g., oil palms), it was sampled with replacement to that sample size. In the final model, oil palms and other plantations classes were combined into the plantation class.

| Land-use class | Sample Size (N) | | |
| --- | --- | --- | --- |
|  | **Africa** | **Asia** | **Latin America** |
| Natural Regrowth | 6,766 | 11,494 | 12,868 |
| Plantation | 415 | 24,893 | 16,472 |
|  |  |  |  |

Table S4.

Sample sizes for internal validation data used to train the final stacked ensemble model, broken down by class and continent.

| Validation  land-use class | Definition, polygon-scale |
| --- | --- |
| Natural Regrowth | ≥10% tree cover.  Natural forest % cover > tree plantation % cover. |
| Plantation | ≥10% tree cover.  Tree plantation % cover > natural forest % cover. |
| Open | <10% tree cover. |

Table S5.

The formal criteria used to define land-use within the gain polygons used for accuracy assessment. Percent cover was calculated exactly for small to medium-sized polygons (<40 pixels (<3.6 ha)) and estimated for large polygons (≥40 pixels).

| **Full Testing Dataset** | | | | | | |  | |  |  | | | |  |
| --- | --- | --- | --- | --- | --- | --- | --- | --- | --- | --- | --- | --- | --- | --- |
| **All tropical regions** | | | **Reference Data (n=2000)** | | | |  | |  | |  | | | |
| Predicted | *Tree plantations* | | | *Natural regrowth* | | *Open* | | Total | | User Acc. | | | | |
| *Tree plantations* | 1255 | | | 78 | | 4 | | 1337 | | 93.9 +/− 0.6 | | | | |
| *Natural regrowth* | 96 | | | 539 | | 7 | | 642 | | 85.1 +/− 1.4 | | | | |
| *Open* | 7 | | | 0 | | 14 | | 21 | | 65.8 +/− 10.5 | | | | |
| Total | 1358 | | | 617 | | 25 | | 2000 | | **Overall** | | | | |
| Prod. Acc. | 92.2  +/− 0.7 | | | 88.9  +/− 1.2 | | 54.5  +/− 10.1 | |  | | 90.6  +/− 0.7 | | | | |
|  | |  | | |  | |  | |  |  | | | |  |
| **Africa** | | | **Reference Data (n=132)** | | | |  | |  | |  | | | |
| Predicted | *Tree plantations* | | | *Natural regrowth* | | *Open* | | Total | | User Acc. | | | | |
| *Tree plantations* | 25 | | | 0 | | 2 | | 27 | | 92.6 +/− 0.5 | | | | |
| *Natural regrowth* | 7 | | | 97 | | 0 | | 104 | | 93.2 +/− 2.5 | | | | |
| *Open* | 1 | | | 0 | | 0 | | 1 | | 0.0 +/− 0.0 | | | | |
| Total | 33 | | | 97 | | 2 | |  | | **Overall** | | | | |
| Prod. Acc. | 75.8  +/− 7.5 | | | 100.0  +/− 0.0 | | 0.0  +/− 0.0 | |  | | 92.4  +/− 2.3 | | | | |
| **Latin America** | | | **Reference Data (n=515)** | | | |  | |  | | |  | | |
| Predicted | *Tree plantations* | | | *Natural regrowth* | | *Open* | | Total | | User Acc. | | | | |
| *Tree plantations* | 280 | | | 13 | | 2 | | 295 | | 94.9 +/− 1.3 | | | | |
| *Natural regrowth* | 17 | | | 181 | | 6 | | 204 | | 88.7 +/− 2.2 | | | | |
| *Open* | 5 | | | 0 | | 11 | | 16 | | 68.8 +/− 11.5 | | | | |
| Total | 302 | | | 194 | | 19 | |  | | **Overall** | | | | |
| Prod. Acc. | 92.7  +/− 1.5 | | | 93.3  +/− 1.8 | | 57.9 +/− 11.3 | |  | | 89.7  +/− 0.8 | | | | |
| **Australasia** | | | **Reference Data (n=1353)** | | | |  | |  | | | |  | |
| Predicted | *Tree plantations* | | | *Natural regrowth* | | *Open* | | Total | | User Acc. | | | | |
| *Tree plantations* | 950 | | | 65 | | 0 | | 1015 | | 93.6 +/− 0.7 | | | | |
| *Natural regrowth* | 72 | | | 261 | | 1 | | 333 | | 78.1 +/− 2.3 | | | | |
| *Open* | 1 | | | 0 | | 3 | | 4 | | 75.0 +/− 21.6 | | | | |
| Total | 1023 | | | 326 | | 4 | |  | | **Overall** | | | | |
| Prod. Acc. | 92.8  +/− 0.8 | | | 80.1  +/− 2.2 | | 75.0 +/− 21.7 | |  | | 91.7  +/− 1.2 | | | | |

Table S6.

Confusion matrices for the independent accuracy assessment for the whole tropics, and for each subregion. Percent accuracy estimates are presented for overall accuracy (OA; mean +/- confidence interval), user’s accuracy (UA; 100-commission error), and producer’s accuracy (PA; 100-omission error). As noted in the supplementary text, confusion matrix counts represent the number of polygons, but PA, UA, and OA are area-weighted estimates.

| **Small Polygon Testing Dataset** | | | | | | |  | |  |  | | | |  |
| --- | --- | --- | --- | --- | --- | --- | --- | --- | --- | --- | --- | --- | --- | --- |
| **All tropical regions** | | | **Reference Data (n=1578)** | | | |  | |  | |  | | | |
| Predicted | *Tree plantations* | | | *Natural regrowth* | | *Open* | | Total | | User Acc. | | | | |
| *Tree plantations* | 844 | | | 72 | | 4 | | 920 | | 91.8 +/− 0.9 | | | | |
| *Natural regrowth* | 95 | | | 535 | | 7 | | 637 | | 84.3 +/− 1.4 | | | | |
| *Open* | 7 | | | 0 | | 14 | | 21 | | 66.3 +/− 10.3 | | | | |
| Total | 946 | | | 607 | | 25 | |  | | **Overall** | | | | |
| Prod. Acc. | 89.2  +/− 1.0 | | | 88.5  +/− 1.3 | | 55.4  +/− 10.0 | |  | | 88.4  +/− 0.8 | | | | |
|  | |  | | |  | |  | |  |  | | | |  |
| **Africa** | | | **Reference Data (n=127)** | | | |  | |  | |  | | | |
| Predicted | *Tree plantations* | | | *Natural regrowth* | | *Open* | | Total | | User Acc. | | | | |
| *Tree plantations* | 20 | | | 0 | | 2 | | 22 | | 90.9 +/− 6.1 | | | | |
| *Natural regrowth* | 7 | | | 97 | | 0 | | 204 | | 93.3 +/− 2.5 | | | | |
| *Open* | 1 | | | 0 | | 0 | | 1 | | 0.0 +/− 0.0 | | | | |
| Total | 28 | | | 97 | | 2 | |  | | **Overall** | | | | |
| Prod. Acc. | 71.4  +/− 8.6 | | | 100.0  +/− 0.0 | | 0.0  +/− 0.0 | |  | | 92.1  +/− 2.4 | | | | |
| **Latin America** | | | **Reference Data (n=478)** | | | |  | |  | | |  | | |
| Predicted | *Tree plantations* | | | *Natural regrowth* | | *Open* | | Total | | User Acc. | | | | |
| *Tree plantations* | 245 | | | 13 | | 2 | | 260 | | 94.2 +/− 1.4 | | | | |
| *Natural regrowth* | 17 | | | 179 | | 6 | | 202 | | 88.6 +/− 2.2 | | | | |
| *Open* | 5 | | | 0 | | 11 | | 16 | | 68.8 +/− 11.5 | | | | |
| Total | 267 | | | 192 | | 19 | |  | | **Overall** | | | | |
| Prod. Acc. | 91.8  +/− 1.7 | | | 93.2  +/− 1.8 | | 57.9  +/− 11.3 | |  | | 91.0  +/− 1.3 | | | | |
| **Australasia** | | | **Reference Data (n=973)** | | | |  | |  | | | |  | |
| Predicted | *Tree plantations* | | | *Natural regrowth* | | *Open* | | Total | | User Acc. | | | | |
| *Tree plantations* | 579 | | | 59 | | 0 | | 538 | | 90.8 +/− 1.1 | | | | |
| *Natural regrowth* | 71 | | | 259 | | 1 | | 331 | | 78.2 +/− 2.3 | | | | |
| *Open* | 1 | | | 0 | | 3 | | 4 | | 75.0 +/− 21.7 | | | | |
| Total | 651 | | | 318 | | 4 | |  | | **Overall** | | | | |
| Prod. Acc. | 88.9  +/− 1.2 | | | 81.4  +/− 2.2 | | 75.0  +/− 21.7 | |  | | 86.4  +/− 1.1 | | | | |

Table S7.

Alternative confusion matrices for the independent accuracy assessment for the whole tropics, and for each subregion, using only reference polygons smaller than 1000 ha. Percent accuracy estimates are presented for overall accuracy (mean +/- confidence interval), user’s accuracy (100-commission error), and producer’s error (100-omission error). As noted in the supplementary text, confusion matrix counts represent the number of polygons, but PA, UA, and OA are area-weighted estimates.

| **Higher Confidence Testing Dataset** | | | | | | |  | |  |  | | | |  |
| --- | --- | --- | --- | --- | --- | --- | --- | --- | --- | --- | --- | --- | --- | --- |
| **All tropical regions** | | | **Reference Data (n=1862)** | | | |  | |  | |  | | | |
| Predicted | *Tree plantations* | | | *Natural regrowth* | | *Open* | | Total | | User Acc. | | | | |
| *Tree plantations* | 1234 | | | 65 | | 3 | | 1302 | | 94.8 +/− 0.6 | | | | |
| *Natural regrowth* | 55 | | | 478 | | 7 | | 540 | | 89.1 +/− 1.3 | | | | |
| *Open* | 7 | | | 0 | | 13 | | 20 | | 64.1 +/− 10.8 | | | | |
| Total | 1296 | | | 543 | | 23 | |  | | **Overall** | | | | |
| Prod. Acc. | 95.0  +/− 0.6 | | | 89.4  +/− 1.2 | | 55.1  +/− 10.5 | |  | | 92.7  +/− 0.6 | | | | |
|  | |  | | |  | |  | |  |  | | | |  |
| **Africa** | | | **Reference Data (n=129)** | | | |  | |  | |  | | | |
| Predicted | *Tree plantations* | | | *Natural regrowth* | | *Open* | | Total | | User Acc. | | | | |
| *Tree plantations* | 24 | | | 0 | | 2 | | 26 | | 92.3 +/− 0.5 | | | | |
| *Natural regrowth* | 5 | | | 97 | | 0 | | 102 | | 95.1 +/− 2.1 | | | | |
| *Open* | 1 | | | 0 | | 0 | | 1 | | 0.0 +/− 0.0 | | | | |
| Total | 29 | | | 97 | | 2 | |  | | **Overall** | | | | |
| Prod. Acc. | 80.0  +/− 7.3 | | | 100.0  +/− 0.0 | | 0.0  +/− 0.0 | |  | | 93.8  +/− 2.1 | | | | |
| **Latin America** | | | **Reference Data (n=492)** | | | |  | |  | | |  | | |
| Predicted | *Tree plantations* | | | *Natural regrowth* | | *Open* | | Total | | User Acc. | | | | |
| *Tree plantations* | 276 | | | 11 | | 1 | | 288 | | 95.8 +/− 1.2 | | | | |
| *Natural regrowth* | 14 | | | 169 | | 6 | | 189 | | 89.4 +/− 2.2 | | | | |
| *Open* | 5 | | | 0 | | 10 | | 15 | | 66.7 +/− 12.1 | | | | |
| Total | 295 | | | 180 | | 17 | |  | | **Overall** | | | | |
| Prod. Acc. | 93.6  +/− 1.4 | | | 93.9  +/− 1.8 | | 58.8  +/− 11.9 | |  | | 92.5  +/− 1.2 | | | | |
| **Australasia** | | | **Reference Data (n=1241)** | | | |  | |  | | | |  | |
| Predicted | *Tree plantations* | | | *Natural regrowth* | | *Open* | | Total | | User Acc. | | | | |
| *Tree plantations* | 934 | | | 54 | | 0 | | 988 | | 94.5 +/− 0.7 | | | | |
| *Natural regrowth* | 36 | | | 212 | | 1 | | 248 | | 85.1 +/− 2.3 | | | | |
| *Open* | 1 | | | 0 | | 3 | | 4 | | 75.0 +/− 21.6 | | | | |
| Total | 971 | | | 266 | | 4 | |  | | **Overall** | | | | |
| Prod. Acc. | 96.2  +/− 0.6 | | | 79.7  +/− 2.4 | | 75.0  +/− 21.7 | |  | | 92.6  +/− 0.7 | | | | |

Table S8.

Alternative confusion matrices for the independent accuracy assessment for the whole tropics, and for each subregion, using only reference polygons predicted with medium to high confidence. Percent accuracy estimates are presented for overall accuracy (mean +/- confidence interval), user’s accuracy (100-commission error), and producer’s error (100-omission error). As noted in the supplementary text, confusion matrix counts represent the number of polygons, but PA, UA, and OA are area-weighted estimates.

| **Comparative TMF Confidence Testing Dataset** | | | | | | |  | |  |  | | | |  |
| --- | --- | --- | --- | --- | --- | --- | --- | --- | --- | --- | --- | --- | --- | --- |
| **All tropical regions** | | | **Reference Data (n=1907)** | | | |  | |  | |  | | | |
| Predicted | *Tree plantations* | | | *Natural regrowth* | | *Open* | | Total | | User Acc. | | | | |
| *Tree plantations* | 774 | | | 18 | | 0 | | 792 | | 97.7 | | | | |
| *Natural regrowth* | 261 | | | 412 | | 1 | | 674 | | 61.1 | | | | |
| *Open* | 250 | | | 168 | | 23 | | 441 | | 5.2 | | | | |
| Total | 1285 | | | 598 | | 24 | |  | | **Overall** | | | | |
| Prod. Acc. | 60.2 | | | 68.9 | | 95.8 | |  | | 63.4 | | | | |
|  | |  | | |  | |  | |  |  | | | |  |
| **Africa** | | | **Reference Data (n=120)** | | | |  | |  | |  | | | |
| Predicted | *Tree plantations* | | | *Natural regrowth* | | *Open* | | Total | | User Acc. | | | | |
| *Tree plantations* | 5 | | | 0 | | 0 | | 5 | | 100.0 | | | | |
| *Natural regrowth* | 16 | | | 71 | | 0 | | 87 | | 81.6 | | | | |
| *Open* | 5 | | | 21 | | 2 | | 28 | | 7.1 | | | | |
| Total | 26 | | | 92 | | 2 | |  | | **Overall** | | | | |
| Prod. Acc. | 19.2 | | | 77.2 | | 100.0 | |  | | 65.0 | | | | |
| **Latin America** | | | **Reference Data (n=512)** | | | |  | |  | | |  | | |
| Predicted | *Tree plantations* | | | *Natural regrowth* | | *Open* | | Total | | User Acc. | | | | |
| *Tree plantations* | 90 | | | 2 | | 0 | | 92 | | 97.8 | | | | |
| *Natural regrowth* | 179 | | | 87 | | 0 | | 266 | | 32.7 | | | | |
| *Open* | 32 | | | 103 | | 19 | | 154 | | 12.3 | | | | |
| Total | 301 | | | 192 | | 19 | |  | | **Overall** | | | | |
| Prod. Acc. | 29.9 | | | 45.3 | | 100.0 | |  | | 38.3 | | | | |
| **Australasia** | | | **Reference Data (n=1275)** | | | |  | |  | | | |  | |
| Predicted | *Tree plantations* | | | *Natural regrowth* | | *Open* | | Total | | User Acc. | | | | |
| *Tree plantations* | 679 | | | 16 | | 0 | | 695 | | 97.7 | | | | |
| *Natural regrowth* | 213 | | | 254 | | 1 | | 468 | | 54.3 | | | | |
| *Open* | 66 | | | 44 | | 2 | | 112 | | 1.8 | | | | |
| Total | 958 | | | 314 | | 3 | |  | | **Overall** | | | | |
| Prod. Acc. | 70.9 | | | 80.9 | | 66.7 | |  | | 73.3 | | | | |

Table S9.

An accuracy assessment of the Tropical Moist Forest (TMF; (*15*)) map of plantations and forests. Shown are confusion matrices for the independent accuracy assessment for the whole tropics, and for each subregion, using all intersecting reference polygons. Percent accuracy calculations are presented for overall accuracy (mean +/- confidence interval), user’s accuracy (100-commission error), and producer’s error (100-omission error). As noted in the supplementary text, confusion matrix counts represent the number of polygons, and for this analysis only, PA, UA, and OA are estimates based on polygon counts.

|  |  | |  |  |  |
| --- | --- | --- | --- | --- | --- |
| **Model terms** | | **Estimate** | **Std. Error** | **P-value** | **Significance** |
| Intercept | | -2.195 | 0.215 | <0.00001 | *** |
| Factor(Regrowth) | | 0.361 | 0.261 | 0.167 | ns |
| Percent IFL | | -0.012 | 0.002 | <0.00001 | *** |
| Log(Area) | | 0.433 | 0.266 | <0.00001 | *** |
| Factor(Regrowth):Log(Area) | | -0.008 | 0.0329 | 0.799 | ns |
| Factor(Regrowth):Percent IFL | | 0.014 | 0.003 | <0.00001 | *** |
|  |  | |  |  |  |
| Net interactive effect of Percent IFL and Factor(Regrowth): | | | | | |
| *Plantations* | -0.012 | | 0.002 |  |  |
| *Regrowth* | 0.0023 | | 0.0168 |  |  |

Table S10.

Summary of regression coefficients for the best-fit model predicting the logarithm of total area of increase in tree cover (sq. km), across ecoregions. The logarithm was base 10, and “ns” indicates “not significant”, while the number of significance stars (e.g., ***) follows standard statistical notation. The factor variable “regrowth” (i.e., natural regrowth) was a categorical variable used to distinguish the type of tree cover increase: natural regrowth, or plantation. The standard errors of the interactive effects were calculated following (*24*).

| Rank | Country name | Patch # | Total Area | % of Global Patch # | % of Global Area | Country Area | % of Country Area |
| --- | --- | --- | --- | --- | --- | --- | --- |
| 1 | Indonesia | 684,816 | 50,620.9 | 34.39313 | 42.81772 | 1,890,244.8 | 2.68 |
| 2 | Brazil | 434,573 | 27,014.8 | 21.82531 | 22.85045 | 8,054,663.7 | 0.34 |
| 3 | Malaysia | 236,189 | 22,930.2 | 11.86199 | 19.39553 | 329,383.4 | 6.96 |
| 4 | China | 292,770 | 4,991.9 | 14.70362 | 4.222418 | 703,598.8 | 0.71 |
| 5 | Thailand | 99,480 | 2,693.3 | 4.996128 | 2.278148 | 514,054.6 | 0.52 |
| 6 | Vietnam | 63,582 | 1,339.1 | 3.193243 | 1.132721 | 329,276.3 | 0.41 |
| 7 | Cote d'Ivoire | 22,487 | 880.3 | 1.129352 | 0.744596 | 321,658.1 | 0.27 |
| 8 | Colombia | 15,517 | 824.4 | 0.779302 | 0.697318 | 1,136,758.8 | 0.07 |
| 9 | Venezuela | 5,480 | 683.1 | 0.275219 | 0.57779 | 912,492.7 | 0.07 |
| 10 | P. N. Guinea | 5,925 | 484.3 | 0.297568 | 0.409647 | 463,631.3 | 0.10 |
| 11 | Tanzania | 8,998 | 475.8 | 0.451901 | 0.402451 | 940,576.1 | 0.05 |
| 12 | South Africa | 5,732 | 469.3 | 0.287875 | 0.396927 | 137,752.5 | 0.34 |
| 13 | Guatemala | 2,658 | 381.0 | 0.133491 | 0.3223 | 109,152.8 | 0.35 |
| 14 | Australia | 2,122 | 367.0 | 0.106572 | 0.310468 | 4,008,687.2 | 0.01 |
| 15 | Zimbabwe | 5,328 | 326.0 | 0.267585 | 0.275755 | 390,680.7 | 0.08 |
| 16 | Kenya | 5,279 | 321.7 | 0.265124 | 0.27211 | 585,983.8 | 0.05 |
| 17 | Honduras | 3,745 | 252.0 | 0.188083 | 0.213177 | 112,289.7 | 0.22 |
| 18 | Ecuador | 6,008 | 215.1 | 0.301736 | 0.181909 | 256,115.6 | 0.08 |
| 19 | Bolivia | 8,952 | 209.5 | 0.449591 | 0.177188 | 1,083,393.0 | 0.02 |
| 20 | Cambodia | 6,016 | 205.8 | 0.302138 | 0.174095 | 181,359.6 | 0.11 |
| 21 | Uganda | 3,727 | 199.9 | 0.187179 | 0.169125 | 241,440.1 | 0.08 |
| 22 | Laos | 7,092 | 193.2 | 0.356178 | 0.163423 | 230,001.6 | 0.08 |
| 23 | Myanmar | 5,085 | 192.3 | 0.255381 | 0.162659 | 571,702.0 | 0.03 |
| 24 | Mexico | 5,876 | 191.1 | 0.295107 | 0.161652 | 1,104,167.4 | 0.02 |
| 25 | Cameroon | 5,567 | 173.6 | 0.279588 | 0.146872 | 466,040.0 | 0.04 |
| 26 | Ghana | 7,598 | 158.4 | 0.38159 | 0.133999 | 238,324.3 | 0.07 |
| 27 | Nigeria | 1,828 | 151.9 | 0.091807 | 0.128525 | 908,410.1 | 0.02 |
| 28 | Peru | 2,588 | 140.4 | 0.129976 | 0.118777 | 1,292,816.5 | 0.01 |
| 29 | Costa Rica | 2,587 | 121.3 | 0.129925 | 0.102641 | 51,176.8 | 0.24 |
| 30 | Philippines | 6,076 | 110.8 | 0.305152 | 0.093729 | 295,856.8 | 0.04 |
| 31 | Paraguay | 3,135 | 99.5 | 0.157447 | 0.084143 | 313,867.2 | 0.03 |
| 32 | Argentina | 3,042 | 79.8 | 0.152777 | 0.067475 | 219,702.6 | 0.04 |
| 33 | Madagascar | 2,946 | 69.6 | 0.147955 | 0.05888 | 581,314.7 | 0.01 |
| 34 | Cuba | 2,251 | 66.0 | 0.113051 | 0.055815 | 110,730.7 | 0.06 |
| 35 | D.R. Congo | 973 | 62.8 | 0.048866 | 0.053139 | 2,329,130.1 | 0.00 |
| 36 | Liberia | 1,498 | 47.1 | 0.075233 | 0.039882 | 95,918.1 | 0.05 |
| 37 | Outside GADM | 572 | 46.5 | 0.028727 | 0.039294 | NA | NA |
| 38 | India | 1,963 | 41.1 | 0.098587 | 0.034794 | 2,017,095.4 | 0.00 |
| 39 | Sri Lanka | 1,354 | 40.2 | 0.068001 | 0.034019 | 65,837.4 | 0.06 |
| 40 | Malawi | 786 | 36.8 | 0.039475 | 0.03116 | 118,028.7 | 0.03 |
| 41 | Domin. Republic | 915 | 32.3 | 0.045954 | 0.027324 | 48,092.1 | 0.07 |
| 42 | Ethiopia | 1,169 | 32.1 | 0.05871 | 0.02711 | 1,129,520.8 | 0.00 |
| 43 | Fiji | 706 | 31.0 | 0.035457 | 0.026258 | 18,963.5 | 0.16 |
| 44 | Panama | 567 | 24.8 | 0.028476 | 0.020974 | 75,103.9 | 0.03 |
| 45 | United States | 179 | 24.5 | 0.00899 | 0.020722 | 17,073.3 | 0.14 |
| 46 | Mozambique | 654 | 22.9 | 0.032845 | 0.019332 | 768,074.2 | 0.00 |
| 47 | Solomon Islands | 317 | 21.8 | 0.015921 | 0.018477 | 28,532.8 | 0.08 |
| 48 | Benin | 655 | 20.3 | 0.032896 | 0.017183 | 115,423.2 | 0.02 |
| 49 | Nicaragua | 530 | 19.5 | 0.026618 | 0.016459 | 128,219.8 | 0.02 |
| 50 | Brunei | 690 | 14.5 | 0.034653 | 0.012304 | 5,777.8 | 0.25 |
| 51 | Rep. of Congo | 480 | 13.4 | 0.024107 | 0.01132 | 341,732.2 | 0.00 |
| 52 | Rwanda | 346 | 9.9 | 0.017377 | 0.008361 | 25,277.7 | 0.04 |
| 53 | Reunion | 376 | 8.9 | 0.018884 | 0.00754 | 2,512.7 | 0.35 |
| 54 | Guinea | 112 | 7.6 | 0.005625 | 0.006467 | 244,816.2 | 0.00 |
| 55 | Puerto Rico | 193 | 5.7 | 0.009693 | 0.004857 | 8,970.5 | 0.06 |
| 56 | Zambia | 126 | 5.5 | 0.006328 | 0.004662 | 750,490.4 | 0.00 |
| 57 | Singapore | 74 | 3.1 | 0.003716 | 0.002586 | 697.0 | 0.44 |
| 58 | Gabon | 99 | 3.0 | 0.004972 | 0.002565 | 264,549.8 | 0.00 |
| 59 | Belize | 105 | 2.9 | 0.005273 | 0.002424 | 21,989.4 | 0.01 |
| 60 | El Salvador | 204 | 2.8 | 0.010245 | 0.002383 | 20,422.7 | 0.01 |
| 61 | Sierra Leone | 147 | 2.0 | 0.007383 | 0.001703 | 72,601.1 | 0.00 |
| 62 | Mauritius | 76 | 2.0 | 0.003817 | 0.001665 | 2,027.4 | 0.10 |
| 63 | C.A.R. | 6 | 1.7 | 0.000301 | 0.001445 | 620,199.7 | 0.00 |
| 64 | Angola | 23 | 0.7 | 0.001155 | 0.000574 | 1,247,425.8 | 0.00 |
| 65 | Burundi | 26 | 0.6 | 0.001306 | 0.000541 | 26,935.3 | 0.00 |
| 66 | Taiwan | 49 | 0.6 | 0.002461 | 0.000497 | 34,762.3 | 0.00 |
| 67 | Guyana | 21 | 0.4 | 0.001055 | 0.000334 | 209,744.1 | 0.00 |
| 68 | Jamaica | 28 | 0.3 | 0.001406 | 0.000257 | 11,000.0 | 0.00 |
| 69 | Haiti | 20 | 0.3 | 0.001004 | 0.000235 | 27,106.7 | 0.00 |
| 70 | Martinique | 23 | 0.2 | 0.001155 | 0.000173 | 1,118.0 | 0.02 |
| 71 | Bahamas | 15 | 0.2 | 0.000753 | 0.000154 | 9,818.6 | 0.00 |
| 72 | Suriname | 3 | 0.2 | 0.000151 | 0.000144 | 146,425.5 | 0.00 |
| 73 | Timor-Leste | 1 | 0.1 | 5.02E-05 | 0.000117 | 14,915.5 | 0.00 |
| 74 | Bangladesh | 1 | 0.1 | 5.02E-05 | 4.8E-05 | 115,712.5 | 0.00 |
| 75 | Guinea-Bissau | 2 | 0.05 | 0.0001 | 4.07E-05 | 33,882.3 | 0.00 |
| 76 | Barbados | 1 | 0.03 | 5.02E-05 | 2.87E-05 | 434.6 | 0.01 |
| 77 | South Sudan | 1 | 0.01 | 5.02E-05 | 6.78E-06 | 628,102.1 | 0.00 |
| 78 | Somalia | 1 | 0.01 | 5.02E-05 | 4.54E-06 | 633,536.4 | 0.00 |

Table S11.

Total area of planation expansion (square kilometers), tallied by country. The percentage of area in each country relative to the total global plantation expansion area is shown.

|  | **Plantations Present Inside PAs** | | | | | | |  |
| --- | --- | --- | --- | --- | --- | --- | --- | --- |
| Biome name | ≤5 ha | >5 ha | % of PAs >5 ha | | ≤50 ha | >50 ha | % of PAs >50 ha | |
| Lakes | 40 | 0 | 0.00 | | 40 | 0 | 0.00 | |
| Deserts and xeric shrublands | 757 | 3 | 0.39 | | 759 | 1 | 0.13 | |
| Flooded grasslands and savannas | 104 | 2 | 1.89 | | 104 | 2 | 1.89 | |
| Mangroves | 612 | 23 | 3.62 | | 624 | 11 | 1.73 | |
| Mediterr. Forests, woodlands and scrubs | 3 | 0 | 0.00 | | 3 | 0 | 0.00 | |
| Montane grasslands and shrublands | 270 | 31 | 10.30 | | 282 | 19 | 6.31 | |
| Temperate broadleaf and mixed forests | 40 | 0 | 0.00 | | 40 | 0 | 0.00 | |
| Temp. grasslands, savannas and shrublands | 3 | 0 | 0.00 | | 3 | 0 | 0.00 | |
| Tropical and subtropical coniferous forests | 554 | 0 | 0.00 | | 554 | 0 | 0.00 | |
| Tropical and subtropical dry broadleaf forests | 1270 | 30 | 2.31 | | 1290 | 10 | 0.77 | |
| Tropical and subtropical grasslands, savannas, and shrublands | 3573 | 143 | 3.85 | | 3640 | 76 | 2.05 | |
| Tropical & subtropical moist broadleaf forests | 6078 | 355 | 5.52 | | 6259 | 174 | 2.70 | |
|  |  |  |  | |  |  |  | |
| **Total** | 13304 | 587 | 4.23 | | 13598 | 293 | 2.11 | |
|  |  |  |  |  | |  | |  |
|  | **Plantations Present Near PAs (within 1 km)** | | | | | | |  |
| Biome name | ≤5 ha | >5 ha | % of PAs >5 ha | ≤50 ha | | >50 ha | | % of PAs >50 ha |
| Lakes | 38 | 1 | 2.56 | 38 | | 1 | | 2.56 |
| Deserts and xeric shrublands | 738 | 8 | 1.07 | 744 | | 2 | | 0.27 |
| Flooded grasslands and savannas | 100 | 0 | 0.00 | 100 | | 0 | | 0.00 |
| Mangroves | 513 | 41 | 7.40 | 532 | | 22 | | 3.97 |
| Mediterr. Forests, woodlands and scrubs | 3 | 0 | 0.00 | 3 | | 0 | | 0.00 |
| Montane grasslands and shrublands | 246 | 47 | 16.04 | 270 | | 23 | | 7.85 |
| Temperate broadleaf and mixed forests | 34 | 5 | 12.82 | 37 | | 2 | | 5.13 |
| Temp. grasslands, savannas and shrublands | 3 | 0 | 0.00 | 3 | | 0 | | 0.00 |
| Tropical and subtropical coniferous forests | 534 | 4 | 0.74 | 537 | | 1 | | 0.19 |
| Tropical and subtropical dry broadleaf forests | 1226 | 56 | 4.37 | 1265 | | 17 | | 1.33 |
| Tropical and subtropical grasslands, savannas, and shrublands | 3450 | 185 | 5.09 | 3573 | | 62 | | 1.71 |
| Tropical & subtropical moist broadleaf forests | 5546 | 711 | 11.36 | 5925 | | 332 | | 5.31 |
|  |  |  |  |  | |  | |  |
| **Total** | **12431** | **1058** | 7.84 | **13027** | | **462** | | 3.43 |

Table S12.

Numbers of protected areas (PAs) experiencing plantation expansion, at two minimum area thresholds (5 and 50 ha). The top table shows expansion within PAs, and the bottom table shows expansion into a 1 km buffer around PAs.

|  | Plantations Present Inside PAs | | | |  |  |
| --- | --- | --- | --- | --- | --- | --- |
|  | ≤5 ha | >5 ha | % of PAs >5 ha | ≤50 ha | >50 ha | % of PAs >50 ha |
| **All biomes** | **13304** | **587** | **4.23** | **13598** | **293** | **2.11** |
| *Bottom 50% human impact index* | *6848* | *106* | *1.52* | *6906* | *48* | *0.69* |
| *Top 50% human impact index* | *6456* | *481* | *6.93* | *6692* | *245* | *3.53* |
|  |  |  |  |  |  |  |
| **Humid tropical biome** | **6078** | **355** | **5.52** | **6259** | **174** | **2.70** |
| *Bottom 50% human impact index* | *3198* | *64* | *1.96* | *3232* | *30* | *0.92* |
| *Top 50% human impact index* | *2880* | *291* | *9.18* | *3027* | *144* | *4.54* |
|  |  |  |  |  |  |  |
|  | Plantations Present Outside PAs | | | |  |  |
|  | ≤5 ha | >5 ha | % of PAs >5 ha | ≤50 ha | >50 ha | % of PAs >50 ha |
| **All biomes** | **12431** | **1058** | **7.84** | **13027** | **462** | **3.43** |
| *Bottom 50% human impact index* | *6827* | *338* | *4.72* | *7028* | *137* | *1.91* |
| *Top 50% human impact index* | *5604* | *720* | *11.39* | *5999* | *325* | *5.14* |
|  |  |  |  |  |  |  |
| **Humid tropical biome** | **5546** | **711** | **11.36** | **5925** | **332** | **5.31** |
| *Bottom 50% human impact index* | *3081* | *236* | *7.11* | *3222* | *95* | *2.86* |
| *Top 50% human impact index* | *2465* | *475* | *16.16* | *2703* | *237* | *8.06* |

Table S13.

Numbers of protected areas (PAs) experiencing plantation expansion, at two minimum area thresholds (5 and 50 ha). The top table shows expansion within PAs, and the bottom table shows expansion into a 1 km buffer around PAs. Expansion is shown for all biomes, and also specifically for the humid tropical biome (“Tropical & subtropical moist broadleaf forests”). Total expansion is shown in bold, while the italics divide plantation expansion between protected areas with high and low values on the human impact index (HII). Protected areas in the bottom 50% had HII values at or below the median value, while the top 50% had HII values above the median value.

| Continent | IUCN rank across plantation presence thresholds | | |
| --- | --- | --- | --- |
|  | 0 hectares | 5 hectares | 50 hectares |
| Africa |  |  |  |
| Plantations present | 6.6 +/− 1.4 | 6.7 +/− 1.1 | 6.7 +/− 1.1 |
| Plantations absent | 6.1 +/− 1.8 | 6.1 +/− 1.8 | 6.2 +/− 1.7 |
| *Significance* | *p<0.0001* | *p<0.0001* | *p=0.0009* |
| Asia |  |  |  |
| Plantations present | 3.0 +/− 2.5 | 2.9 +/− 2.4 | 2.8 +/− 2.6 |
| Plantations absent | 3.4 +/− 2.3 | 3.4 +/− 2.4 | 3.3 +/− 2.4 |
| *Significance* | *ns* | *ns* | *ns* |
| Latin America |  |  |  |
| Plantations present | 5.1 +/− 2.1 | 5.2 +/− 2.1 | 5.4 +/− 1.7 |
| Plantations absent | 5.2 +/− 2.1 | 5.3 +/− 1.9 | 5.2 +/− 2.1 |
| *Significance* | *ns* | *ns* | *ns* |

Table S14.

The mean (+/− standard deviation) IUCN rank of tropical protected areas, comparing protected areas with and without observed plantation expansion. The area threshold for observation plantation expansion in a protected area was varied for this analysis (no threshold, >5 hectares, and >50 hectares). The significances for Kruskal-Wallis tests of differences within each continent and threshold are shown (ns = non-significant).

| Part A: GFC accuracy assessment | | |  |  |
| --- | --- | --- | --- | --- |
|  | Reference Point Forest Change (n=3000) | | |  |
| GFC | *Gain* | *No Gain* | Total | User Acc. |
| *Gain* | *33* | *6* | 39 | 84.6 |
| *No Gain* | *50* | *2911* | 2961 | 98.3 |
| Total | 83 | 2917 |  | Overall |
| Prod. Acc. | 39.8 | 99.8 |  | 98.1 |
|  |  |  |  |  |
| Part B: Land-use in reference gain points (n=83) | | |  |  |
|  |  | Reference land-use data | |  |
| GFC | All Gain | *Tree plantations* | *Natural regrowth* | |
| *Gain* | 33 | *15* | *18* |  |
| *No Gain* | 50 | *22* | *28* |  |
| Total | 83 | 37 | 46 |  |
| Prod. Acc. | 39.8 | 40.5 | 39.1 |  |

**Tree plantation proportion of all GFC product gain:** 15/33 = 45.5%

**Tree plantation proportion of reference sample gain:** 37/83 = 44.6%

**Estimated abundance, humid tropics 2000-2012:**

Plantations: 37/3000 = 1.2%

Natural regrowth: 46/3000 = 1.5%

Table S15.

GFC predictions of land-use change (2000-2012) are compared with reference land-use data across the humid tropical biome, sampled at randomly located points (n=3000). Part A shows a confusion matrix assessment of the GFC product accuracy, including producer’s accuracy (100- omission error), user’s accuracy (100-commission error), and overall accuracy. Part B shows a detailed count of the land-use type in the subset of the reference points with tree cover gain during this time period, and calculation of the producer’s accuracy (100-omission error) for two gain subclasses. Additional estimates of plantation relative abundance are shown for both the GFC product and reference data, and absolute abundance is estimated using the reference data.

Data S1. (separate file)

The testing data used to assess model predictive accuracy is enclosed (“Nature2021_Fagan_test_fin_111520_allC_locsXY_selected.csv”). The format is a comma-separated text data table (n=2000); because some large polygons were sampled more than once, there are only 1881 unique rows. See the notes column for column name explanations; the X and Y columns describe the patch polygon centroids. The full polygons were used to assess accuracy. The vector polygon boundaries are available from the corresponding author upon request, and will be placed in a data repository and linked here upon manuscript acceptance.

Data S2. (separate file)

The independent land-use assessment data is enclosed (“Nature2021_Fagan_LUCassess_3000randPts_humidTropics_060621_v1.csv”). The format is a comma-separated text data table (n=3000), with each row representing a random point location. See the notes column for column name explanations.
