# Supplementary material for: The expansion of tree plantations across tropical biomes
Source: Research Square preprint supplement (doi:10.21203/rs.3.rs-604751/v1), 2021-06-22
Supplement: Supplementary file 2 [file 8af4a296ead47497340dc801.csv]

point_number	ref	class	dist	ext2	X	Y	Notes
0	ng		0	0	132.313215	-1.746770124	point_number is a unique point ID.
1	ng		0	0	77.86101161	27.5459362	ref indicates "no gain" (ng) or gain ("r") in tree cover at or near (<1 km) a point, 2000-2012.
2	ng		0	0	5.691021718	5.917775264	class indicates the 2012 class for the points with gain (tp= tree plantation, f = natural forest). See text for definitions
3	r	f	0	0	-50.74036165	-17.73996789	dist is the distance from the central point to the observed tree cover gain, searching radially clockwise.
4	r	f	0	0	116.5709501	27.42806865	ext2 is the value of the Hansen GFC gain product at the point location (0 or 1).
5	r	tp	10	1	103.8073318	-3.964396422	X and Y are the coordinates of the central point, in WGS-84 (EPSG 4326).
6	ng		0	0	-63.38940957	-3.031816241
7	r	f	100	0	-51.49866954	-23.63284219
8	ng		0	0	23.20334666	2.245550853
9	ng		0	0	73.85860505	16.10761915
10	ng		0	0	-77.37003218	-8.836521661
11	ng		0	0	17.34021534	0.270220588
12	ng		0	0	27.33348425	-1.166312528
13	ng		0	0	113.9543156	23.03319284
14	r	f	110	0	-65.56165119	-9.764201493
15	ng		0	0	-54.02037329	-25.82082823
16	ng		0	0	-64.79193458	1.948056958
17	ng		0	0	95.07377211	18.05452108
18	ng		0	0	-65.59846035	-4.731656361
19	ng		0	0	11.24267813	2.925073137
20	ng		0	0	-75.78865955	-1.83175785
21	r	f	400	0	-98.268332	22.15951004
23	ng		0	0	-56.84779809	-9.09793458
24	ng		0	0	-52.6578297	-9.689767608
25	ng		0	0	-11.19044479	9.261834483
26	ng		0	0	-52.41044212	-23.36722377
27	ng		0	0	81.2689684	17.65452198
28	ng		0	0	-66.15002515	5.689868327
29	ng		0	0	98.01272092	17.32336729
30	ng		0	0	-12.22228708	8.345330109
31	ng		0	0	107.8198645	29.19896948
32	ng		0	0	103.3168165	-2.534293213
34	ng		0	0	-78.67977531	-4.126441709
35	ng		0	0	38.17296081	6.301544931
36	ng		0	0	15.40020824	4.09106479
38	ng		0	0	-76.16809889	3.91606665
39	ng		0	0	81.30425837	21.88270089
41	ng		0	0	110.8012756	19.96668762
42	ng		0	0	-76.80388078	3.239033345
43	ng		0	0	14.4321067	3.853461345
44	ng		0	0	102.2778316	25.66105568
45	r	f	500	0	111.8242216	23.13551392
46	ng		0	0	149.1728276	-9.03395432
47	ng		0	0	-1.007473383	6.353070136
48	ng		0	0	120.6243	16.92993584
49	ng		0	0	-66.38189348	-6.996775876
50	ng		0	0	80.94141588	21.74025401
51	ng		0	0	102.7654596	23.3596612
52	ng		0	0	-53.99385559	-23.20442826
53	ng		0	0	-74.17783209	5.71822265
54	ng		0	0	112.6166574	0.051440107
55	r	tp	0	0	-41.6330976	-20.80221346
56	ng		0	0	13.84905919	2.331312564
57	ng		0	0	-73.52449527	7.639291082
58	r	f	286	0	111.0856292	23.82829387
59	ng		0	0	-62.00554411	-7.987712618
60	ng		0	0	-40.40594269	-17.29751204
61	ng		0	0	-53.58218464	-23.04301931
62	ng		0	0	121.4914884	0.769023919
63	r	f	200	0	-74.18011787	-10.8531126
64	r	f	250	0	18.25411359	3.894085645
65	r	f	500	0	80.48176679	18.39685845
66	ng		0	0	95.11193432	19.0110217
67	r	f	588	0	-48.7923793	-1.134525721
68	ng		0	0	-63.86768427	-11.2316614
69	ng		0	0	-69.57527836	-0.717191657
70	ng		0	0	13.28557991	0.689681971
71	ng		0	0	-55.71055284	-6.70474732
72	ng		0	0	-74.71739045	8.407424186
73	ng		0	0	-65.6603142	2.283452733
74	ng		0	0	17.40700383	3.401581356
75	ng		0	0	-58.80198723	-7.859170889
76	ng		0	0	-13.03590422	8.698540032
77	r	f	0	0	104.5095791	22.78925369
78	ng		0	0	6.242177206	6.501362757
79	r	tp	450	0	115.7029633	23.61407208
80	ng		0	0	105.7309215	18.63753172
81	r	f	250	0	125.4153398	7.258565618
82	ng		0	0	12.05482888	-1.242621706
83	ng		0	0	-45.73410661	-2.385910242
84	ng		0	0	-77.11900098	-6.008326293
85	r	tp	430	0	99.661162	1.330660596
86	ng		0	0	45.46315426	-18.50632797
87	ng		0	0	27.06312956	-0.292694607
88	ng		0	0	100.7932325	-1.238429108
89	ng		0	0	78.48147434	27.55686554
90	ng		0	0	14.23776211	3.75824119
91	ng		0	0	-60.0342991	-7.641231541
92	ng		0	0	143.2398755	-5.93011936
93	ng		0	0	14.39453176	3.625518314
94	ng		0	0	13.17157032	-0.683889945
95	ng		0	0	-99.03569304	21.27509371
96	r	f	100	0	-70.88257703	8.155660746
97	r	f	500	0	48.70340854	-13.53279494
98	ng		0	0	144.6492965	-4.873910317
99	ng		0	0	-59.53746112	-8.860930068
100	r	f	250	0	-51.29483626	-6.941686331
101	ng		0	0	-48.34354518	-1.859672763
102	ng		0	0	-73.67042647	-9.75536575
103	ng		0	0	-2.512868174	5.655193451
104	ng		0	0	-74.9808774	-10.18893422
105	ng		0	0	-77.16679997	0.201409314
106	ng		0	0	-55.22572808	-24.08082317
107	ng		0	0	7.161860496	4.877810895
108	ng		0	0	-77.13998609	0.554613262
109	ng		0	0	8.250403461	5.445103028
110	ng		0	0	-56.47684309	-11.33425045
111	ng		0	0	-50.75477308	-3.506265865
112	ng		0	0	-56.1103877	-8.699681721
113	r	tp	950	0	101.5105392	27.19815867
114	ng		0	0	112.2391593	22.50154257
115	r	tp	885	0	-59.44757559	-2.705572621
116	ng		0	0	-65.33356414	-3.977459216
117	ng		0	0	-48.47331026	-9.132044231
118	r	f	0	0	-50.89685071	-6.904966406
119	r	tp	790	0	75.71480746	13.36095017
120	ng		0	0	111.3942858	0.701278672
121	ng		0	0	83.76702797	27.9429158
122	ng		0	0	6.01353043	4.941899009
123	ng		0	0	-77.11812527	-0.106298469
124	ng		0	0	-68.68039823	-1.550235372
125	ng		0	0	-58.16517058	-0.405582699
126	ng		0	0	-75.74843788	-7.920525996
127	r	f	0	1	92.5504953	25.80740864
128	ng		0	0	-70.36001955	-11.06475973
129	ng		0	0	26.37522	-3.345301042
130	r	tp	340	0	103.0557953	-2.437971298
131	ng		0	0	-67.03247502	1.090247047
132	ng		0	0	-4.024943914	6.558093198
133	ng		0	0	-57.71854578	-6.499420086
134	r	f	615	0	-51.09829789	-26.78819545
135	ng		0	0	106.5472779	-6.892894175
136	ng		0	0	-62.71004225	-8.82046502
137	ng		0	0	139.463416	-5.463026782
138	r	tp	0	0	-41.24322028	-20.95973
139	r	f	550	0	-54.41058194	-26.81740425
140	ng		0	0	88.40291756	24.94037663
142	r	tp	760	0	121.5213158	-4.383781615
143	ng		0	0	-59.71398134	-5.108625968
144	ng		0	0	141.0739257	-2.65551412
145	r	f	0	0	117.2119284	24.61889023
146	ng		0	0	24.04216006	0.738744265
147	ng		0	0	-90.95088236	17.04846878
148	r	f	15	1	-55.49316825	-2.365366212
149	ng		0	0	-79.00351524	-5.051984618
150	ng		0	0	-73.49175484	18.27993509
151	ng		0	0	116.2446839	23.51855682
152	ng		0	0	117.4276376	0.210815894
153	r	tp	150	0	84.94342732	19.74958824
154	ng		0	0	116.6271716	24.57508104
155	ng		0	0	-58.3719568	-1.481996853
156	ng		0	0	-5.264574661	6.603530014
157	ng		0	0	116.4755557	26.89605986
159	ng		0	0	97.1668739	3.761585775
160	ng		0	0	-66.67391619	-3.915086137
161	r	tp	100	0	110.0134835	24.69645294
162	r	f	500	0	109.6302408	28.53286154
163	ng		0	0	102.6487576	17.15887082
164	r	tp	250	0	-50.65481477	-20.18110787
165	ng		0	0	-94.81106921	16.96228987
166	ng		0	0	81.05192675	22.02797464
167	ng		0	0	104.3809606	12.95905779
168	ng		0	0	-70.01519132	-1.280237676
169	ng		0	0	-11.34663299	8.097321779
170	ng		0	0	134.3578881	-3.895366625
171	ng		0	0	103.9230174	23.47798176
172	ng		0	0	-7.483590612	5.724347325
173	ng		0	0	94.88553329	17.50366981
174	ng		0	0	28.80096192	0.606385464
175	r	f	0	0	-74.60523854	8.681145953
176	ng		0	0	98.71613749	16.41847023
177	ng		0	0	138.5645575	-2.723587502
178	ng		0	0	-36.1716423	-9.650269871
179	ng		0	0	-71.83824591	-4.403838318
180	ng		0	0	14.82417357	0.743270736
181	r	f	0	0	-98.59530902	23.09691732
182	r	f	160	0	95.91392899	17.73324327
184	r	f	787	0	49.50345037	-13.77517578
185	ng		0	0	-75.98224774	-8.764723754
186	ng		0	0	86.26748287	22.27944046
187	ng		0	0	-54.57867258	-11.73909558
188	ng		0	0	109.2493822	24.36502559
189	ng		0	0	10.22252004	2.751767608
190	ng		0	0	90.54875244	26.35419467
191	ng		0	0	8.852120831	5.190044469
192	ng		0	0	124.595376	6.30339597
193	ng		0	0	-60.93154656	-3.405448125
194	r	f	450	0	-63.52127136	-14.74881973
195	ng		0	0	-49.53363127	-21.60785975
196	ng		0	0	78.92776668	19.04545924
197	ng		0	0	-64.36738898	-8.497387879
198	r	tp	817	0	113.7602847	26.40603382
199	ng		0	0	95.39652363	17.0736576
200	ng		0	0	-76.41073107	1.839245952
201	r	f	750	0	95.4782077	23.59287751
202	ng		0	0	-51.49114014	-23.88129004
203	r	f	400	0	99.5549096	22.43329611
204	ng		0	0	145.1631772	-5.576113124
205	ng		0	0	123.5097224	13.02407855
206	r	tp	550	0	113.2099579	25.37621927
207	r	f	170	0	103.1063649	-2.495689398
208	r	tp	267	0	75.20472304	14.81743057
209	ng		0	0	178.3267235	-17.8058486
210	ng		0	0	27.17053351	-33.42739441
211	r	f	70	0	-47.88504268	-6.889068188
212	ng		0	0	-84.5414305	12.72403805
213	ng		0	0	85.52188351	26.20271173
214	r	f	250	0	-80.11602703	22.04921726
215	ng		0	0	-51.66649486	-9.264510576
216	ng		0	0	106.8321672	15.97942647
217	ng		0	0	110.84452	-7.703044643
218	ng		0	0	-56.7836906	-5.01367489
219	ng		0	0	-65.43161329	-4.952745305
220	r	tp	210	0	115.6223542	24.76617151
221	ng		0	0	23.61870768	3.54885065
222	ng		0	0	101.6664782	19.62328611
224	ng		0	0	-71.66097498	0.908189531
225	r	f	0	0	-79.35775599	-5.780694266
227	ng		0	0	-73.89383531	18.20652758
228	ng		0	0	-63.34865286	4.317276263
229	ng		0	0	-64.46073215	4.521832391
230	ng		0	0	106.635019	22.75611593
231	ng		0	0	28.32876918	0.903097196
232	r	f	900	0	39.73404761	-10.38135977
233	ng		0	0	-53.8839374	-10.52361174
234	ng		0	0	17.83924411	1.132374147
235	ng		0	0	149.0397859	-21.10444103
236	ng		0	0	-71.41879874	-11.02925165
237	ng		0	0	108.7716253	25.51708044
238	ng		0	0	140.7260363	-4.15151768
239	ng		0	0	21.44282251	3.783698274
240	ng		0	0	-75.53259053	4.518486274
241	ng		0	0	-75.24632989	-5.937165499
242	r	f	826	0	99.69441833	1.13679568
243	ng		0	0	-8.245739208	4.997155477
244	ng		0	0	-62.97875531	-11.81025365
245	ng		0	0	23.39562721	2.139509538
246	r	tp	0	0	-43.34111482	-20.56344587
247	ng		0	0	21.05973133	4.161042071
248	ng		0	0	-52.48105227	-7.813381079
249	ng		0	0	40.5936495	9.38612595
250	ng		0	0	27.79016935	-2.777169076
251	r	f	410	0	19.64763044	-2.026332579
252	ng		0	0	24.64838237	3.179232519
253	ng		0	0	-70.47062679	-0.979335159
254	r	f	350	0	99.56340023	22.93868936
255	r	f	210	0	-85.45022148	12.63007104
256	ng		0	0	-73.34520888	-12.74961775
257	ng		0	0	-71.67856484	0.435166876
258	r	tp	250	0	116.4256115	26.78951899
259	ng		0	0	14.27177828	3.260517173
260	ng		0	0	81.07673902	25.79235625
261	ng		0	0	20.25388303	4.257154983
262	r	f	0	0	102.8776299	23.19988408
263	ng		0	0	81.08574337	18.39212496
264	ng		0	0	26.22737951	1.739593781
265	r	tp	230	0	104.782618	25.34382434
266	ng		0	0	-50.76176129	-25.5656321
267	r	f	120	0	-67.90413938	-15.34021016
268	ng		0	0	-65.80614718	6.159665425
269	ng		0	0	-74.3884761	-6.785905842
270	ng		0	0	-73.81389592	3.058777675
271	ng		0	0	114.6104029	0.369529997
272	ng		0	0	98.41166939	2.459169952
273	r	f	0	0	-78.69542097	-0.890175634
274	ng		0	0	-73.43701099	-13.10520418
275	ng		0	0	140.9125023	-6.31354246
276	r	f	780	0	103.2677369	-3.141728681
277	ng		0	0	100.1852944	0.800003603
278	r	tp	0	1	98.78236758	3.666898158
279	ng		0	0	106.3098864	17.21945641
280	ng		0	0	-4.680177581	5.856367919
281	ng		0	0	98.78138376	19.73455904
282	r	f	950	0	-89.7276633	18.47614594
283	r	f	100	0	22.93202536	2.059496826
284	ng		0	0	131.9566533	-0.918243975
285	ng		0	0	96.04829561	21.60742015
286	r	f	100	0	-91.60418012	17.711971
287	ng		0	0	46.80793057	-23.54006506
288	ng		0	0	20.22831682	-0.158452529
289	ng		0	0	-72.26038329	-8.03311602
290	ng		0	0	39.97869481	-13.49022615
291	r	f	638	0	12.71343112	-2.136831537
292	r	f	0	0	-90.15961343	14.1249976
293	ng		0	0	98.75551725	20.04844639
294	ng		0	0	134.5781503	-6.062154928
295	ng		0	0	26.88401157	-3.271836923
296	ng		0	0	-63.42156719	-2.167823227
297	ng		0	0	122.6598523	-5.005322666
298	ng		0	0	-65.14318428	4.408412553
299	r	tp	150	0	102.0338564	-0.117426883
300	r	tp	750	0	37.07259762	-3.174458735
301	ng		0	0	10.78726127	-0.429243166
302	ng		0	0	120.9877665	-2.077066421
303	ng		0	0	36.12443296	11.94657664
304	ng		0	0	117.6367646	8.951432626
305	ng		0	0	97.40967434	24.52024844
306	r	tp	850	0	-46.48292682	-21.93500686
307	ng		0	0	103.8978019	22.3025466
308	ng		0	0	16.39012087	-0.316952018
309	ng		0	0	99.64641206	19.33221458
310	ng		0	0	-65.41686498	3.180592131
311	r	tp	450	0	-62.29632829	-10.76811632
312	ng		0	0	125.2417109	8.172384889
313	r	f	0	0	111.9415073	26.51805329
314	ng		0	0	121.8507457	17.37355409
315	ng		0	0	-61.88329405	5.976563412
316	ng		0	0	-81.17205859	26.04497259
317	ng		0	0	-69.8458121	-13.77825314
318	ng		0	0	-63.91260206	5.741124166
319	ng		0	0	100.2738015	23.81972202
320	ng		0	0	-72.23679914	-11.52671001
321	ng		0	0	18.00443432	1.163876735
322	r	f	565	0	-75.03106329	-8.860438058
323	ng		0	0	80.01618833	28.52788345
324	ng		0	0	-95.89039755	18.29974399
325	ng		0	0	-76.20200209	-9.670078015
326	ng		0	0	7.890382797	5.590269099
327	ng		0	0	-60.09855003	-4.235045869
328	ng		0	0	79.83421415	18.97574421
329	ng		0	0	114.1527583	23.24773935
330	ng		0	0	41.79941725	-0.841311705
331	ng		0	0	-70.86829529	0.091230945
332	r	f	0	1	-50.25657702	-2.15501149
333	ng		0	0	26.32162499	-1.00333007
334	ng		0	0	-59.84019423	-8.607988536
335	r	f	600	0	102.6800768	20.31472541
336	ng		0	0	-62.63710577	-4.9302131
337	ng		0	0	102.8200322	4.051775484
338	ng		0	0	-75.0021664	-5.410820036
339	ng		0	0	-67.55397813	-8.339648571
340	r	f	0	1	35.91601523	-7.928312325
342	ng		0	0	-68.62458819	-4.224002776
343	ng		0	0	37.07374558	1.86049843
344	ng		0	0	13.26794692	3.681403916
345	r	f	800	0	-73.540665	8.652067113
346	ng		0	0	95.1573635	19.11152973
347	ng		0	0	-48.30690574	-7.011183024
348	ng		0	0	82.457397	22.4495774
349	ng		0	0	-75.73034947	-10.73287064
351	ng		0	0	-67.49396105	2.203324282
352	ng		0	0	-3.701176316	5.741545356
353	ng		0	0	48.78640581	-16.44885151
354	ng		0	0	29.39988974	-3.787138181
356	ng		0	0	145.8295939	-6.074085063
357	ng		0	0	12.49202313	-2.594040283
358	ng		0	0	-52.31958638	-25.94662751
359	ng		0	0	16.67767678	3.494883156
360	ng		0	0	111.2322897	-2.480676867
361	ng		0	0	121.6817253	16.14323404
362	ng		0	0	100.9332538	23.37847475
363	ng		0	0	-49.02372276	-25.82548997
364	ng		0	0	-66.09628989	-15.62772659
365	ng		0	0	15.751902	1.140927202
366	ng		0	0	-8.260694497	6.94919973
367	ng		0	0	-51.70551554	-22.22409531
368	ng		0	0	114.1803096	-7.896995027
369	ng		0	0	112.586479	0.404195525
370	ng		0	0	-46.35044002	-4.65565804
371	r	tp	0	1	105.7314956	-2.819534982
372	ng		0	0	147.6837815	-7.962951842
373	ng		0	0	40.75149337	-2.004559859
374	ng		0	0	-57.60158053	-0.869760607
375	ng		0	0	-61.94452165	-12.04776395
376	ng		0	0	94.39217938	27.4396619
377	ng		0	0	10.71599597	0.151931468
378	ng		0	0	-63.60926307	-13.89362397
379	ng		0	0	-46.10123592	-3.798268546
380	ng		0	0	-37.69259788	-12.10411514
381	ng		0	0	-79.60470624	-0.796215496
382	ng		0	0	84.17661597	28.14310295
383	ng		0	0	140.2201681	-5.187498875
384	ng		0	0	103.3211251	-0.374978866
385	ng		0	0	-52.54081594	-6.259883263
386	ng		0	0	-9.966647033	8.341538307
387	ng		0	0	48.27560335	-20.648908
388	ng		0	0	-52.3171709	-9.726220847
389	ng		0	0	-41.19081404	-17.10492717
390	r	tp	400	0	-48.96689177	-26.83847672
392	ng		0	0	-69.63670578	-10.52246042
393	ng		0	0	119.4000846	27.99513694
394	ng		0	0	-47.37446826	-22.25712014
395	ng		0	0	-77.52210011	-3.751634754
396	ng		0	0	-67.30088667	-1.756840174
397	ng		0	0	88.36720818	25.92343517
398	ng		0	0	124.7124323	1.075712262
399	ng		0	0	35.67926877	9.05023136
400	ng		0	0	29.26199583	-2.448223396
401	ng		0	0	-73.71221075	-9.314494554
402	ng		0	0	25.39528532	-32.69359327
403	ng		0	0	21.68986264	0.167975838
404	ng		0	0	92.1075123	26.34983986
405	ng		0	0	-62.51650445	-12.54860598
406	ng		0	0	-74.889188	-6.63080371
407	ng		0	0	-69.98573036	-13.75446707
408	ng		0	0	-67.40507303	-16.50867869
409	ng		0	0	-64.72625507	5.052951441
410	ng		0	0	117.7347854	4.867039093
411	r	tp	250	0	-50.75881518	-24.42328346
412	ng		0	0	23.20974212	3.196749803
413	ng		0	0	100.674624	6.730087448
414	ng		0	0	19.8423716	-3.96797362
415	ng		0	0	112.1680218	-0.491739732
416	ng		0	0	102.0182516	27.05014073
417	ng		0	0	110.9833428	29.61917748
418	ng		0	0	-41.48664662	-18.32935271
419	ng		0	0	101.2083525	25.72510999
420	ng		0	0	93.24776762	25.40733571
421	ng		0	0	120.3604329	23.93762066
422	ng		0	0	110.910898	26.78276311
423	ng		0	0	-62.98704031	6.758724625
425	ng		0	0	-65.68398815	-2.925953701
426	ng		0	0	-62.73458371	1.150035121
427	ng		0	0	-54.69114713	-26.08049142
428	ng		0	0	-76.29015285	4.944273528
429	ng		0	0	-73.87853217	-7.420138072
430	ng		0	0	139.9945595	-5.104740338
431	ng		0	0	-50.13020908	-25.62648879
432	ng		0	0	-54.39619259	-28.20790108
433	ng		0	0	80.39004528	22.27568374
434	ng		0	0	12.23002444	-4.332306816
435	ng		0	0	96.91664464	18.7525893
436	ng		0	0	-60.03661991	2.186829903
437	ng		0	0	106.4700896	20.49970646
438	ng		0	0	107.9261089	25.89020383
439	ng		0	0	81.63958294	19.61539589
440	ng		0	0	75.66370495	12.07053961
441	ng		0	0	134.4696007	-3.309685488
442	ng		0	0	22.09271088	4.415267669
443	ng		0	0	109.3588619	1.747625565
444	ng		0	0	-65.71783778	5.87000452
445	ng		0	0	23.49170695	5.759540857
446	ng		0	0	-63.59519075	-13.88649785
447	ng		0	0	-60.90582858	4.419730863
448	ng		0	0	-71.71619653	-11.99970773
449	ng		0	0	-68.53878938	-5.632344192
450	ng		0	0	-40.38438038	-18.969812
451	ng		0	0	-89.17111925	19.0629825
452	ng		0	0	101.7025988	16.18996565
453	ng		0	0	-61.20714791	4.886662545
454	ng		0	0	30.11845463	-7.607701185
455	ng		0	0	-92.71630845	17.39777915
456	ng		0	0	101.1650607	17.58631933
457	ng		0	0	22.39232527	1.770635774
458	ng		0	0	45.92836252	-18.27779952
459	ng		0	0	-68.06317455	1.71949016
460	ng		0	0	73.46549732	16.75023454
461	ng		0	0	119.1854577	28.26067263
462	ng		0	0	139.2758936	-7.312314775
463	ng		0	0	83.10534209	26.60583249
464	ng		0	0	80.89883314	17.71573824
465	ng		0	0	-57.35057206	-2.605999034
466	ng		0	0	-64.73980381	-3.119037611
467	ng		0	0	-64.91084222	4.850177508
468	ng		0	0	-69.25251021	-7.767556844
469	ng		0	0	-62.05205541	1.369721994
470	ng		0	0	-76.56706955	6.962728218
471	ng		0	0	75.9208162	11.26945951
472	ng		0	0	143.8753884	-7.019896832
473	ng		0	0	120.9139821	24.16055862
474	ng		0	0	102.2978309	-1.381663168
475	ng		0	0	16.46530989	0.01738711
476	r	tp	330	0	-90.1991482	16.10051153
477	r	tp	0	1	101.9425806	-3.400125669
478	ng		0	0	-48.43280927	-7.736477407
479	ng		0	0	91.92246474	25.42548576
480	ng		0	0	29.68959823	0.551049278
481	ng		0	0	-55.9986995	-5.111471491
482	ng		0	0	-65.37491192	-8.129514465
483	ng		0	0	118.1498535	28.18634469
484	ng		0	0	5.811453957	6.390053002
485	ng		0	0	-54.66392075	-7.768052359
486	ng		0	0	14.99938001	3.742241975
487	ng		0	0	-56.56816572	-10.15684465
488	ng		0	0	147.317405	-9.1098361
489	ng		0	0	-52.9807101	-0.536052549
490	ng		0	0	139.0981488	-4.011085231
491	ng		0	0	-66.24061802	-16.45517581
492	ng		0	0	100.9962528	18.49204085
493	ng		0	0	101.9419835	3.80591694
494	r	tp	150	0	-51.29488758	-23.2798019
495	ng		0	0	-76.29965704	-2.027631345
496	ng		0	0	48.38474382	-18.69844805
497	ng		0	0	119.9269363	-2.67807791
498	ng		0	0	-39.1869237	-13.45809199
499	ng		0	0	-77.61023311	-8.632174356
500	ng		0	0	78.22052228	25.71741402
501	ng		0	0	-45.90058067	-22.04260813
502	ng		0	0	-56.16248414	-11.41217423
503	ng		0	0	-61.41541336	-11.04034284
504	ng		0	0	-36.02261075	-8.155255266
505	ng		0	0	18.02760849	1.815489005
506	ng		0	0	97.74251579	26.12051061
507	ng		0	0	-83.76311886	10.83258718
508	ng		0	0	11.60026102	-0.652161832
509	ng		0	0	-52.0889351	-27.41997185
510	ng		0	0	117.1132088	2.779696205
511	ng		0	0	42.91526929	0.352290013
512	r	f	450	0	94.08110164	25.80705578
513	ng		0	0	-50.15599245	-2.69174499
514	ng		0	0	97.39787037	22.14646051
515	ng		0	0	-57.25816844	-7.101093309
516	ng		0	0	104.301456	-4.56679254
517	ng		0	0	111.7515983	1.624386852
518	r	f	800	0	110.5024894	27.05241115
519	ng		0	0	99.85239399	15.47973983
520	ng		0	0	-52.72811642	-25.86828729
521	r	f	0	0	77.63252423	8.15567647
522	ng		0	0	-64.16795798	-14.18828768
523	ng		0	0	-47.98028916	-2.299517794
524	ng		0	0	123.9765646	9.775685564
525	ng		0	0	11.36112926	0.144205539
526	ng		0	0	-62.36234482	0.836896209
527	ng		0	0	97.19057418	26.70766782
528	ng		0	0	-60.32754539	-11.14730912
529	ng		0	0	77.02701802	11.3267677
530	r	tp	0	1	-39.78413555	-16.47668674
531	ng		0	0	-60.75779476	-6.972465114
532	ng		0	0	85.26545077	25.94920473
533	ng		0	0	-64.88066585	-9.802459528
534	ng		0	0	-52.43551325	-7.897613337
535	ng		0	0	112.0799277	1.20232497
536	ng		0	0	-77.6617502	2.491000276
537	ng		0	0	-66.20424229	-8.247675364
538	ng		0	0	102.3461189	19.1256419
539	ng		0	0	50.04696025	-15.09419864
540	ng		0	0	-64.65570873	-16.06430869
541	ng		0	0	-65.4588574	1.275606663
542	ng		0	0	98.09458548	19.86758157
543	ng		0	0	-87.89606663	18.46150417
544	ng		0	0	-0.344479873	5.855172884
545	ng		0	0	148.3322392	-8.960470556
546	r	f	0	1	-99.00947398	21.76084213
547	ng		0	0	-75.76181269	6.748505919
548	ng		0	0	83.30715338	23.40065779
549	ng		0	0	-90.98031567	16.07613045
550	ng		0	0	-83.39120998	9.5003881
551	ng		0	0	-73.16479155	-12.04616241
552	ng		0	0	-60.68190116	-7.795648539
553	ng		0	0	85.00763055	20.28927316
554	ng		0	0	-49.18880019	-18.22382466
555	ng		0	0	-65.5251009	6.048455012
556	r	f	750	0	-48.02872364	-2.417688232
557	ng		0	0	-41.68722439	-4.57126492
558	r	tp	950	0	99.1843371	0.653637177
559	ng		0	0	-92.45551126	18.51350298
560	ng		0	0	102.2259772	24.33869066
561	r	f	990	0	109.9758384	29.74236323
563	ng		0	0	104.9531391	28.11427184
564	ng		0	0	109.9901749	23.28804114
565	r	f	770	0	106.5808497	16.15185541
566	ng		0	0	-65.40646377	-1.555163719
567	r	f	770	0	102.8519059	-4.155808359
568	ng		0	0	-64.53461824	-0.023222025
569	r	tp	590	0	-3.763218921	5.314136105
570	ng		0	0	18.56873126	-0.577266348
571	ng		0	0	113.8418843	-2.5148723
572	ng		0	0	10.16880713	3.20895968
573	ng		0	0	-40.49626916	-17.39400023
574	ng		0	0	-62.19550453	-9.420960114
575	ng		0	0	-46.16591994	-3.393388541
576	ng		0	0	41.24476361	7.232683906
577	ng		0	0	122.1652129	-4.101516719
578	ng		0	0	-75.25698047	0.966715874
579	ng		0	0	-54.0232615	-26.40102946
580	ng		0	0	-65.32031112	1.595475202
581	ng		0	0	-53.24386271	-7.256726121
582	ng		0	0	74.73294782	15.16316135
584	ng		0	0	39.24155671	6.1745283
585	ng		0	0	114.5358392	2.529616372
586	ng		0	0	-72.65485196	0.01278936
587	r	f	150	0	-74.00075559	10.97532509
588	ng		0	0	-53.68487528	-2.181820696
589	r	f	750	0	106.8957613	21.13194198
590	ng		0	0	-52.58057599	-11.08634298
591	ng		0	0	-73.73514535	-4.449062802
592	ng		0	0	39.28839548	13.49495523
593	ng		0	0	108.3434334	13.8472938
594	ng		0	0	-68.95266816	-7.330543893
595	r	f	0	0	110.1109752	30.23194074
596	ng		0	0	-76.55915319	-0.864811649
597	ng		0	0	32.30638867	-27.35120748
598	ng		0	0	122.0237116	17.42228241
599	ng		0	0	-69.90254392	-13.07435749
600	ng		0	0	17.58628106	3.086642767
601	ng		0	0	108.9654882	27.63200356
602	ng		0	0	118.8350941	28.37941046
603	ng		0	0	109.291965	23.97152747
604	ng		0	0	-8.502401191	7.269809081
605	ng		0	0	-62.56971474	7.132055417
606	ng		0	0	-73.9359331	-11.01218881
607	ng		0	0	111.7647357	27.78970758
608	ng		0	0	-76.77323515	-6.844159015
609	ng		0	0	96.89765131	23.68954175
610	ng		0	0	102.0056867	26.29710728
611	r	tp	0	1	115.6057133	-3.695418096
612	ng		0	0	120.30384	23.74899648
613	ng		0	0	-66.34797522	-7.764431244
614	ng		0	0	-64.36841195	1.620907911
615	r	tp	800	0	109.4336185	22.93756252
616	ng		0	0	-57.44125746	-0.022781387
617	ng		0	0	107.2488034	29.10045022
618	ng		0	0	-52.84358869	-0.541638894
619	ng		0	0	-2.601480502	6.317178165
620	ng		0	0	23.19328552	1.550256161
621	ng		0	0	-58.14401561	-3.2707893
622	ng		0	0	-63.26835932	-4.78173275
623	ng		0	0	-57.65139116	-8.895989305
624	ng		0	0	-55.22504971	-4.92720527
625	r	tp	80	0	99.83558436	1.902151527
626	ng		0	0	20.05974186	4.666425065
627	ng		0	0	91.55299268	25.76588461
628	ng		0	0	-61.44299285	-9.198852731
629	ng		0	0	114.3277884	23.84201745
630	ng		0	0	-60.74674301	-4.522863394
631	r	f	0	0	116.7943916	5.14408133
632	ng		0	0	-48.27038264	-25.41443295
633	ng		0	0	-70.47541225	-12.12326442
634	ng		0	0	-54.52446036	-8.80240238
635	ng		0	0	-54.39553631	0.346739782
636	ng		0	0	100.3372069	22.09943168
637	ng		0	0	-51.70950883	-11.65952978
638	ng		0	0	81.09046549	27.46249487
639	ng		0	0	-74.24337222	8.579123342
640	ng		0	0	-64.70686146	0.441354601
641	ng		0	0	-97.98469722	21.28679203
642	ng		0	0	-63.26527995	-6.992917672
643	ng		0	0	32.2268937	-28.05612146
644	ng		0	0	-65.0985528	-11.33523984
645	ng		0	0	114.2063794	23.06334481
646	ng		0	0	-61.85667946	-6.965499078
647	ng		0	0	-71.59237684	-5.338308594
648	ng		0	0	-62.63496214	-7.035613862
649	ng		0	0	-48.35165014	-7.156446919
650	ng		0	0	-75.4445934	-10.64449827
651	r	tp	200	0	114.4709814	23.03533638
652	ng		0	0	-69.48510875	2.66539847
653	ng		0	0	-71.51129607	-1.607860826
654	ng		0	0	-58.20295171	-8.306477543
655	ng		0	0	-46.12792547	-19.36242791
656	ng		0	0	18.88885392	4.232828939
657	ng		0	0	-62.27470275	-1.654601177
658	ng		0	0	135.8573474	-4.470538552
659	ng		0	0	102.6495852	23.45852221
660	ng		0	0	82.4542496	17.64741556
661	ng		0	0	-54.2016552	-11.5307763
662	ng		0	0	-62.38833679	6.355152841
663	ng		0	0	-66.92265314	2.018144954
664	ng		0	0	-7.297742581	5.15859682
666	r	f	110	0	-61.07555543	-10.40701729
667	ng		0	0	98.9427991	12.7027699
668	ng		0	0	149.7419841	-5.939788414
669	ng		0	0	81.91860715	27.50600019
670	ng		0	0	-76.07630018	-1.812836356
671	r	tp	100	0	98.99480853	8.655456529
672	ng		0	0	-74.40197494	-6.239691283
673	ng		0	0	-63.76038004	-0.319434055
674	ng		0	0	105.2396697	19.67037614
675	ng		0	0	13.52637969	1.816476608
676	ng		0	0	85.46743108	25.58290918
677	r	f	0	0	112.5602098	25.33170219
678	ng		0	0	-76.08542707	6.696129971
679	ng		0	0	-59.16786143	-4.598770948
680	r	f	0	1	106.037554	-2.478743415
681	ng		0	0	85.78056528	25.92003151
682	r	f	120	0	34.9679423	-23.37969615
683	ng		0	0	-64.8390698	2.652050801
684	ng		0	0	80.81880228	6.693640185
685	ng		0	0	35.40237072	-8.060685629
686	ng		0	0	-54.32776043	-23.27178682
687	ng		0	0	-8.576305909	5.285127203
688	ng		0	0	-67.26937757	-0.159457217
689	ng		0	0	98.65973923	12.89347444
690	ng		0	0	130.392513	-0.161309772
691	ng		0	0	114.2747105	24.90178295
692	ng		0	0	151.9779222	-5.48296639
693	ng		0	0	-63.98342005	-2.80726712
694	ng		0	0	37.671527	6.655401777
696	ng		0	0	40.14987061	-10.53127595
697	ng		0	0	100.2880095	21.3560138
698	ng		0	0	-54.1663782	-8.014047131
699	ng		0	0	-68.32729787	1.758191942
700	ng		0	0	125.2226692	7.740269278
701	ng		0	0	-66.55334876	-8.481431216
702	r	f	150	0	110.858062	23.05581526
703	r	tp	100	0	-42.00639013	-17.53151199
704	ng		0	0	94.43487278	24.70042786
705	ng		0	0	29.40395095	0.152231788
706	ng		0	0	-54.45360859	-23.18733974
707	ng		0	0	-55.46828039	-24.86461259
708	ng		0	0	-5.793021452	5.081967185
709	ng		0	0	35.33559709	-17.45744155
710	ng		0	0	-2.284215553	6.467958021
711	ng		0	0	-57.37318802	0.982672152
712	ng		0	1	102.063598	4.966075893
713	ng		0	0	102.0012693	26.75109498
714	ng		0	0	-54.78561925	-9.746425242
715	ng		0	0	85.75073658	25.1942544
716	r	f	30	1	26.66342248	2.516371654
717	ng		0	0	9.570528715	4.598360974
718	ng		0	0	-74.42505079	-6.453154493
719	ng		0	0	94.38540579	24.54937448
720	ng		0	0	-63.59923953	-15.33761916
721	ng		0	0	18.18920904	-0.90186534
722	ng		0	0	12.87497309	2.366042357
723	ng		0	0	-6.026137885	5.605285055
724	ng		0	0	86.29110882	21.2127285
725	ng		0	0	14.72182749	3.640812432
726	ng		0	0	-73.14606485	2.211612638
727	ng		0	0	140.4937081	-6.946903542
728	ng		0	0	121.5990247	-4.415865756
729	ng		0	0	103.5676949	23.48177119
730	ng		0	0	93.99576204	25.12240811
731	ng		0	0	-51.97238567	-10.26531457
732	ng		0	0	-89.90692758	18.70315417
733	ng		0	0	111.9481468	22.34639592
734	ng		0	0	86.12651287	21.25653195
735	ng		0	0	-64.55237678	-6.675106898
736	r	tp	0	0	99.30284496	7.946135764
737	ng		0	0	19.93589804	-1.88300452
738	ng		0	0	94.73815516	22.79699888
739	ng		0	0	-73.78585572	-12.24685078
740	ng		0	0	20.70334503	-1.653542439
741	ng		0	0	22.87132829	3.549961613
742	ng		0	0	151.9792515	-5.484658541
743	ng		0	0	-53.47693694	-3.022430747
744	ng		0	0	121.398277	15.4378862
745	ng		0	0	-50.73404628	-19.38729967
746	ng		0	0	-49.78135484	-8.086355863
747	ng		0	0	-41.87529693	-15.48133828
748	ng		0	0	114.5928307	23.19836614
749	ng		0	0	48.7712103	-16.14433995
750	ng		0	0	-68.82974862	-4.399142067
751	ng		0	0	-64.73484109	6.793224909
752	ng		0	0	-76.87343202	-4.826354123
753	ng		0	0	-84.15053216	12.65259674
754	ng		0	0	106.3659595	27.57781908
755	ng		0	0	-68.32497462	-8.694175495
756	ng		0	0	118.6588886	26.7126734
757	r	f	600	0	-88.02540316	20.23376638
758	ng		0	0	15.4326976	0.343192356
759	ng		0	0	-56.53484252	-5.518240273
760	ng		0	0	-82.53490755	22.83462125
761	ng		0	0	82.73058719	21.51304105
762	ng		0	0	-64.00808037	-2.361171939
763	ng		0	0	100.7518707	6.515678937
764	ng		0	0	-75.63167381	-7.369249428
765	ng		0	0	35.4543202	9.076416406
767	ng		0	0	11.68160762	1.962807897
769	ng		0	0	-46.64188402	-4.102055255
770	ng		0	0	-92.53822431	15.8199577
771	ng		0	0	10.80279425	-0.532802913
773	ng		0	0	103.4925091	22.59606606
775	ng		0	0	-60.99007655	-0.486282671
776	ng		0	0	-66.72786736	5.812363334
777	ng		0	0	35.42784151	-21.89932149
778	ng		0	0	-58.28370152	-9.724428743
779	ng		0	0	140.6767603	-4.489603193
780	ng		0	0	-94.94897597	18.50201866
781	ng		0	0	-55.18196493	-2.818588223
783	ng		0	0	7.170132271	4.903687215
784	ng		0	0	-65.5935796	3.152079479
785	ng		0	0	-65.23725872	3.696295536
786	ng		0	0	-51.30767651	-27.51697166
787	ng		0	0	-57.35081771	-6.618444077
788	ng		0	0	-40.59571821	-17.34964895
789	ng		0	0	-92.27157322	18.4166748
790	ng		0	0	3.237709906	6.671623704
791	ng		0	0	-61.69998398	-5.256010431
792	ng		0	0	38.00668578	7.06109622
793	ng		0	0	75.73920218	12.3549713
794	ng		0	0	19.13770867	-1.956882097
795	ng		0	0	97.82039488	3.612624476
796	ng		0	0	97.24274086	4.974624948
797	ng		0	0	10.29912996	-1.162853435
798	ng		0	0	-66.84483685	3.948215221
799	ng		0	0	80.51628644	18.02685783
800	r	tp	550	0	126.4452048	7.113612721
801	ng		0	0	-64.69721086	-11.47023004
802	ng		0	0	-58.05331148	1.335456185
803	ng		0	0	-55.28569742	-0.868981091
804	ng		0	0	107.2170158	24.32400375
805	ng		0	0	14.33189419	3.578686886
806	ng		0	0	-51.94386773	-7.187181055
807	ng		0	0	124.0686972	0.869035716
808	ng		0	0	-75.60062396	7.858409604
809	ng		0	0	106.5190819	26.84239119
810	ng		0	0	125.5727878	7.438923602
811	ng		0	0	105.0032904	28.12967094
812	ng		0	0	-61.15088987	13.27389654
813	ng		0	0	-59.65680943	-9.742765404
814	ng		0	0	-62.88265274	-0.844765053
815	ng		0	0	-66.14630516	2.633935895
816	ng		0	0	-59.1986221	-1.246238319
817	ng		0	0	-62.16505996	-12.41133313
818	ng		0	0	38.90224947	-5.030956058
819	ng		0	0	149.1961356	-21.14928253
820	ng		0	0	-50.91118862	-7.449851578
821	ng		0	0	99.05806059	21.5596049
822	ng		0	0	-58.95963126	5.129326336
823	ng		0	0	-74.60974326	5.806580512
824	ng		0	0	16.37144959	0.730080733
825	ng		0	0	123.0134306	9.95202711
826	ng		0	0	14.95859233	0.518494026
827	r	f	10	1	-82.15448573	8.5689721
828	ng		0	0	-59.44240958	-2.200882868
829	ng		0	0	11.93010966	-1.148166565
830	ng		0	0	40.2448092	-2.130783527
831	ng		0	0	85.88099115	21.26985907
832	ng		0	0	-68.70033656	-0.437217043
833	ng		0	0	96.85763929	22.56258837
834	ng		0	0	-52.26138957	-21.98689102
835	ng		0	0	25.57963564	0.794684004
836	ng		0	0	103.8904531	25.85736955
837	ng		0	0	-59.3599281	-4.479995525
838	ng		0	0	-66.86853993	-8.062621465
839	ng		0	0	-41.08022621	-15.50401078
840	ng		0	0	-56.33864078	-8.118233751
841	ng		0	0	79.05853413	27.45577524
842	ng		0	0	22.1776019	-0.340435863
843	ng		0	0	-46.91628457	-22.87190649
844	ng		0	0	106.2050591	27.56032546
845	ng		0	0	-57.78853152	-9.212419914
846	ng		0	0	111.8584932	-7.715131234
847	r	tp	750	0	-49.51296386	-20.79097848
849	ng		0	0	-71.84247602	1.064510072
850	ng		0	0	96.17000096	4.837860159
851	ng		0	0	-63.40630317	-11.00537793
852	ng		0	0	100.6772743	22.94190373
853	ng		0	0	-89.70209698	15.33517246
854	ng		0	0	-71.15444525	-9.361522256
855	ng		0	0	125.2793903	12.29349023
856	ng		0	0	119.6086074	-5.266007697
857	ng		0	0	100.7841455	19.90322276
858	ng		0	0	-71.46609458	-4.219736752
859	ng		0	0	-70.17608994	-4.041466704
860	ng		0	0	126.5465858	7.481499368
861	ng		0	0	98.75073462	16.00257487
862	ng		0	0	-58.39535715	-0.129051232
863	ng		0	0	101.8308878	0.5646095
864	ng		0	0	87.68178409	25.48717755
865	ng		0	0	-90.1214482	18.7745467
867	ng		0	0	-48.69465541	-2.745839731
868	ng		0	0	-50.86497934	-7.068754137
869	ng		0	0	-57.92427005	-4.562910493
870	ng		0	0	-73.39811437	-12.82883613
871	ng		0	0	-76.63702138	-2.923849775
872	ng		0	0	96.15418991	18.91399432
873	ng		0	0	-75.39123015	-3.270905344
874	ng		0	0	-47.79048158	-5.424686299
875	ng		0	0	-71.73127072	-10.90745371
876	ng		0	0	114.7830799	4.818875589
877	ng		0	0	34.39517137	-24.83995215
878	r	tp	370	0	105.9571818	-2.133334027
879	ng		0	0	-68.5111846	-2.004067214
880	ng		0	0	-74.42352014	5.616743923
881	ng		0	0	-47.87007105	-24.47728289
882	ng		0	0	-51.13299532	-10.60002786
883	ng		0	0	-46.01245289	-1.935911734
884	ng		0	0	-65.79268192	-16.14112861
885	ng		0	0	-48.41247605	-6.789670455
886	ng		0	0	-72.21953808	-1.297200784
887	r	f	530	0	-63.5453384	0.190379061
888	ng		0	0	47.03691872	-20.79604184
889	ng		0	0	-69.1579564	-14.1311461
890	ng		0	0	20.01090999	-1.130607631
891	ng		0	0	97.89875133	17.68130288
892	ng		0	0	46.93128824	-21.82054374
893	ng		0	0	-2.966012932	5.628598758
894	ng		0	0	28.43506331	-1.484927102
895	r	tp	100	0	-50.42789572	-21.70823863
896	ng		0	0	-55.81998263	-8.660550906
897	ng		0	0	103.0894173	26.85100053
898	r	f	10	1	-47.2373677	-3.135421543
899	ng		0	0	-42.36260572	-18.47294565
900	ng		0	0	-90.78443684	18.42107117
901	ng		0	0	84.27967973	24.66820312
902	ng		0	0	-98.7627958	22.34718428
903	ng		0	0	112.7905466	24.40735932
904	ng		0	0	-48.52998622	-7.237873127
905	ng		0	0	12.28316418	1.305117722
906	ng		0	0	-73.63918797	-9.776565692
907	ng		0	0	115.9123085	27.21347418
908	ng		0	0	96.28655471	23.11719225
909	ng		0	0	121.3248486	1.075461078
910	ng		0	0	47.99148758	-21.03886812
912	ng		0	0	30.03549938	-7.79598398
913	ng		0	0	100.2009481	26.00500733
914	ng		0	0	-43.24923993	-2.486169623
915	ng		0	0	-53.46812387	-24.12535501
917	ng		0	0	80.6777863	22.71130828
918	ng		0	0	-59.01629424	-6.01090142
919	r	f	150	0	-46.77334814	-1.721906457
920	ng		0	0	15.27867848	2.790367434
921	ng		0	0	20.49340881	-1.024006837
922	r	f	0	0	168.0173883	-21.57225957
923	ng		0	0	79.69906472	24.96436877
924	ng		0	0	-76.75495301	-7.268817924
925	ng		0	0	12.77745579	3.785630159
926	ng		0	0	-40.33722772	-14.43123851
927	ng		0	0	41.19353936	-1.103602727
928	ng		0	0	150.7314593	-22.67004315
929	ng		0	0	103.5251878	11.32799182
930	r	f	0	1	117.5766345	27.53304315
931	ng		0	0	48.81812424	-17.85960656
932	ng		0	0	-55.9541693	-6.49685929
933	ng		0	0	91.25295725	24.39173507
934	ng		0	0	130.5827592	30.27425536
935	ng		0	0	-73.85143592	-8.067499123
936	ng		0	0	-77.53397105	0.907461195
937	ng		0	0	25.57451039	2.760959069
938	ng		0	0	121.14809	14.22421902
939	ng		0	0	-53.10751191	-12.11405266
940	ng		0	0	97.51542731	21.46424873
941	ng		0	0	-50.5720661	-3.004905671
942	ng		0	0	-59.58184909	-9.81615261
943	ng		0	0	99.08071049	11.27925507
944	ng		0	0	103.4234967	2.935563965
945	ng		0	0	82.19368926	25.43185666
946	ng		0	0	-67.71168784	-2.220150988
947	ng		0	0	-63.04195993	-10.90922236
948	ng		0	0	-52.45965456	-7.817367428
949	ng		0	0	30.77785955	2.321969429
950	ng		0	0	46.37031586	-21.32662795
951	ng		0	0	37.20880421	8.639380839
952	ng		0	0	-72.32352225	-1.780450384
953	ng		0	0	-54.87661587	-3.486015118
954	ng		0	0	106.0189705	10.17167098
955	ng		0	0	-76.38663243	-9.785150329
956	ng		0	0	-60.20289616	1.233548106
957	ng		0	0	-74.12782077	-1.897701157
958	ng		0	0	124.0411247	0.425782587
959	ng		0	0	13.88511367	0.814458564
960	ng		0	0	10.79975381	6.270816984
961	ng		0	0	-56.59584802	-11.40706744
962	ng		0	0	-72.76873306	7.689779001
963	r	f	600	0	-87.3081679	15.47640788
964	ng		0	0	90.43826345	25.17922796
965	ng		0	0	103.1237099	-0.075267442
966	ng		0	0	121.8546086	29.34568998
967	r	tp	150	0	100.2586277	1.404387223
968	ng		0	0	-73.23320753	-10.78150664
969	r	f	0	1	111.4139739	-2.491488822
970	ng		0	0	-69.8905078	-11.14433087
971	ng		0	0	47.09003845	-18.65344626
972	ng		0	0	19.3540128	-3.126072247
973	ng		0	0	35.559962	0.318773751
974	ng		0	0	-49.19916979	-5.077491763
975	ng		0	0	-42.92716536	-21.68701192
976	ng		0	0	-73.23211299	-13.29824872
977	ng		0	0	-51.28601352	-6.889706252
978	ng		0	0	-44.75741356	-23.16041988
979	ng		0	0	113.9182577	24.57806248
980	ng		0	0	-62.82053314	-2.186390802
981	ng		0	0	111.179703	-0.892110244
982	ng		0	0	121.2716553	-3.474872121
983	r	tp	60	0	117.780265	25.87524123
984	ng		0	0	-40.47536421	-18.71581455
985	r	tp	100	0	106.2246136	-2.71018511
986	ng		0	0	-74.20708213	-6.641111153
987	ng		0	0	-77.00556378	5.689736905
988	ng		0	0	95.27730033	18.6752247
990	r	tp	480	0	108.5205831	23.19345591
991	ng		0	0	45.92472313	-22.61040561
992	ng		0	0	-50.45504464	-2.06022696
993	ng		0	0	34.28067776	-24.04495886
994	ng		0	0	37.92519173	14.5904049
995	ng		0	0	23.34209486	0.869693624
996	ng		0	0	115.8507679	24.19077593
997	ng		0	0	-58.50091924	-7.950874143
998	ng		0	0	96.05378824	25.85127424
999	ng		0	0	-48.83067309	-8.246015872
1000	ng		0	0	85.75739867	26.49162754
1001	ng		0	0	-70.01316371	-1.479903279
1002	ng		0	0	-57.73699781	-7.302200753
1003	ng		0	0	-54.84379352	-25.78743943
1004	ng		0	0	-53.2058458	-12.8698061
1005	ng		0	0	38.7161337	14.60140663
1006	ng		0	0	80.71326113	19.04407892
1007	r	tp	212	0	102.0207529	4.024903596
1008	ng		0	0	10.24811929	-1.671328789
1009	ng		0	0	-73.61326317	-9.494612806
1010	ng		0	0	103.9083546	21.69659303
1011	ng		0	0	-66.32622697	-5.78198289
1012	ng		0	0	104.0835845	-4.981520112
1014	ng		0	0	-64.6730876	-19.48436967
1015	ng		0	0	-49.84335886	-16.73753286
1016	ng		0	0	-63.06891184	-4.787331547
1017	ng		0	0	46.24991303	-23.00937312
1018	ng		0	0	-40.41220766	-15.50882136
1019	ng		0	0	-80.6709989	7.382267711
1020	ng		0	0	48.74528051	-19.48063292
1021	ng		0	0	-64.77050495	5.078449417
1022	ng		0	0	17.45566209	1.577720239
1023	ng		0	0	81.80439118	22.36413836
1024	ng		0	0	84.56153511	20.45248735
1025	r	f	0	0	-56.76714977	-11.49743791
1026	ng		0	0	-69.33298699	-0.875279649
1027	ng		0	0	98.0491273	26.12119869
1028	ng		0	0	-65.04761953	-8.308398368
1029	ng		0	0	-70.2994118	-3.886767579
1030	ng		0	0	73.97689395	16.66317246
1031	ng		0	0	-68.97031934	2.831012959
1032	ng		0	0	-42.3920299	-21.05951286
1033	ng		0	0	-50.1544391	-18.49116549
1034	ng		0	0	26.83398752	-2.479158022
1035	ng		0	0	83.32206396	25.89049211
1036	ng		0	0	45.53394995	-18.99392141
1037	ng		0	0	150.704425	-5.989044231
1038	ng		0	0	111.9847446	1.791571896
1039	ng		0	0	78.92807186	25.95149038
1040	ng		0	0	126.2030168	8.463132486
1041	ng		0	0	120.1590954	-4.664889557
1042	ng		0	0	20.8952412	-2.353577989
1043	ng		0	0	-57.96205777	-6.256792303
1044	ng		0	0	-55.63255593	-9.085629216
1045	ng		0	0	-7.479699734	6.749657285
1046	ng		0	0	-50.63910352	-29.67288542
1047	ng		0	0	106.0401885	25.65857975
1049	ng		0	0	-51.57052875	-3.829289828
1050	ng		0	0	-62.62192137	5.557852749
1051	ng		0	0	20.10522999	3.817929527
1052	ng		0	0	-53.6946906	-3.140129069
1053	ng		0	0	-61.08364528	-12.00941141
1054	ng		0	0	-78.34139375	-7.842624952
1055	ng		0	0	105.3635773	-1.671007922
1056	ng		0	0	-74.18764281	-7.63234983
1057	ng		0	0	-62.14318724	-2.527465673
1058	ng		0	0	10.70411148	6.397721671
1059	ng		0	0	-65.30839512	-24.26545149
1060	ng		0	0	80.2913843	6.171461453
1061	ng		0	0	102.8143272	25.13852569
1062	ng		0	0	26.81686574	-1.283543857
1063	ng		0	0	-81.6704633	8.248954862
1064	ng		0	0	75.65266132	13.56180212
1065	ng		0	0	149.2131811	-5.968151479
1066	ng		0	0	28.393022	-1.149830259
1067	ng		0	0	-77.54398927	-6.381019139
1068	ng		0	0	-68.93018669	-5.852169074
1069	ng		0	0	98.38844849	25.43876059
1070	ng		0	0	-83.81837263	11.67332201
1071	ng		0	0	-48.20788184	-2.053400937
1072	ng		0	0	119.3682491	28.46531727
1073	ng		0	0	-58.22500294	-0.337153036
1074	ng		0	0	6.55057315	5.93810826
1075	ng		0	0	-62.78144475	4.564747385
1076	ng		0	0	-66.97154026	2.182384381
1077	ng		0	0	-71.90254767	8.111372699
1078	ng		0	0	-67.1953032	-10.47446205
1079	ng		0	0	86.9164054	22.04510903
1080	ng		0	0	-60.46650758	-8.136100216
1081	ng		0	0	-75.23378015	5.225421272
1082	ng		0	0	-44.20976679	-4.688499377
1083	ng		0	0	-53.34554202	-1.985878995
1084	ng		0	0	83.07869564	22.94313816
1085	ng		0	0	141.4304033	-3.943940517
1086	ng		0	0	-51.58563961	-27.55150814
1087	ng		0	0	109.3302872	-7.581492689
1088	ng		0	0	-59.10691034	1.437155172
1089	ng		0	0	-66.54908045	-14.73033009
1090	ng		0	0	-55.69704686	-10.86504096
1091	r	tp	0	0	101.1843648	0.663622917
1092	ng		0	0	115.3013955	26.95519365
1093	ng		0	0	-69.57437003	-3.074767962
1094	ng		0	0	103.3164733	20.54554871
1095	ng		0	0	24.02421085	-2.566466459
1096	ng		0	0	-63.50413406	-1.225500333
1097	ng		0	0	-70.18804523	1.596056246
1098	ng		0	0	29.85158441	-7.816610396
1099	ng		0	0	102.1227521	19.07621736
1100	ng		0	0	107.1067448	27.63313951
1101	ng		0	0	-53.91458394	-5.05110242
1102	ng		0	0	-51.0662747	-23.36579932
1103	ng		0	0	92.4191845	25.35275783
1104	ng		0	0	97.07265669	25.98694813
1105	r	f	130	0	117.5292141	4.82764532
1106	ng		0	0	25.10987849	3.992100852
1107	ng		0	0	49.48555261	-14.72905671
1108	ng		0	0	84.89337154	21.36397983
1109	ng		0	0	-9.268205393	6.494330366
1111	ng		0	0	-53.97561084	-10.67229125
1112	ng		0	0	-70.986173	2.45670146
1113	ng		0	0	99.27994579	21.11361391
1114	ng		0	0	-73.7376505	2.370800447
1115	ng		0	0	-98.52323319	21.68306081
1116	ng		0	0	13.27097014	0.843632357
1117	ng		0	0	-71.63288483	-4.074200122
1118	ng		0	0	113.0072668	26.32012094
1119	ng		0	0	26.6752715	-1.045475595
1120	ng		0	0	12.77613205	2.734279508
1121	ng		0	0	-47.07961697	-2.07503625
1122	ng		0	0	14.99082633	2.229233755
1123	r	f	500	0	-73.09841273	-9.503375807
1124	ng		0	0	119.8535761	27.10967909
1125	ng		0	0	-83.97687025	11.00579004
1126	ng		0	0	98.39343571	18.86053988
1127	ng		0	0	-65.17347019	-1.518182789
1128	ng		0	0	116.9156249	2.593913765
1129	ng		0	0	47.07997123	-17.26696314
1130	ng		0	0	47.16567158	-24.03977733
1131	ng		0	0	-71.7924897	-0.968809416
1132	ng		0	0	-74.52121847	7.812939601
1133	ng		0	0	119.5097247	26.19918807
1134	ng		0	0	35.97508017	9.219684431
1135	ng		0	0	-65.51767363	-8.764968842
1136	ng		0	0	22.41475915	-2.865400102
1137	ng		0	0	-71.60130338	-7.583074946
1138	ng		0	0	94.09197978	22.84783529
1139	ng		0	0	-56.844646	-12.90217697
1140	ng		0	0	-70.02949027	-0.15077675
1141	r	f	0	1	113.0147479	0.000204731
1142	ng		0	0	-73.35800886	-11.81182797
1143	r	tp	100	0	90.66711865	26.36976445
1144	ng		0	0	46.62966205	-19.79750501
1145	ng		0	0	-67.63861356	-9.66175108
1146	ng		0	0	85.84929405	20.32148242
1147	ng		0	0	77.24335806	9.569917895
1148	ng		0	0	95.78966762	27.43397784
1149	ng		0	0	25.78461063	1.95755157
1150	ng		0	0	120.7730456	17.97799168
1151	ng		0	0	-57.90136402	-0.956135162
1152	ng		0	0	-46.3034875	-4.821460053
1153	ng		0	0	108.5586498	29.42328343
1154	ng		0	0	116.2045661	0.918511371
1155	ng		0	0	-58.88747124	-3.845848056
1156	ng		0	0	-90.2831545	19.29162356
1157	ng		0	0	105.0492812	28.03361683
1158	ng		0	0	-53.18498256	-25.28026103
1159	ng		0	0	16.88115914	-2.133347452
1160	ng		0	0	82.25587386	25.34989021
1161	ng		0	0	140.2858924	-6.434208141
1162	ng		0	0	-66.36776086	-15.85851496
1163	ng		0	0	111.6665447	22.62479595
1164	ng		0	0	-52.98703363	-10.10123902
1165	ng		0	0	140.3680015	-6.921861344
1166	ng		0	0	119.5533959	25.52642046
1167	ng		0	0	100.6313452	15.04525861
1168	ng		0	0	85.30628599	26.37956494
1169	ng		0	0	115.8154029	26.41340917
1170	ng		0	0	-80.52870212	9.024853898
1171	ng		0	0	107.8323334	26.8006243
1172	ng		0	0	142.3112074	-5.099638013
1173	ng		0	0	-75.86543524	0.903941708
1174	ng		0	0	112.08345	27.18212247
1175	ng		0	0	-56.09932003	-0.301122847
1176	ng		0	0	-55.28963681	-2.68545256
1177	ng		0	0	-71.40092719	-5.083956665
1178	ng		0	0	110.5045871	29.18147765
1179	ng		0	0	-89.40632899	14.43420623
1180	ng		0	0	39.09940279	8.030080994
1181	ng		0	0	-61.79933198	-10.71245452
1182	ng		0	0	107.3545486	23.22916794
1183	ng		0	0	154.933521	-5.845030264
1185	ng		0	0	91.13888735	23.92912031
1186	ng		0	0	-35.99420295	-8.864187751
1187	ng		0	0	27.25284139	-1.05397784
1188	ng		0	0	105.0078181	19.64667972
1189	ng		0	0	138.3135218	-3.605661824
1190	ng		0	0	110.8781957	28.32827671
1191	ng		0	0	-52.63521143	-9.805715487
1192	ng		0	0	-51.02716588	-3.368585364
1193	ng		0	0	105.853717	25.50575917
1194	ng		0	0	-69.89441157	-7.221497199
1195	ng		0	0	96.41478078	17.21583161
1196	ng		0	0	-57.49453919	-11.70914892
1197	ng		0	0	105.3697453	27.45066233
1198	ng		0	0	19.60372367	-3.893056233
1199	ng		0	0	23.17011596	-2.875658868
1200	r	f	420	0	98.80720256	22.03316381
1201	ng		0	0	-77.66156353	-6.455799862
1202	ng		0	0	146.6319737	-7.776622834
1203	ng		0	0	98.71400751	3.699989386
1204	ng		0	0	-43.17965131	-22.44148278
1205	ng		0	0	112.3414531	28.0581378
1206	ng		0	0	111.3331621	23.64348813
1207	ng		0	0	-88.58293488	19.17167368
1208	ng		0	0	20.26529745	0.243553753
1209	ng		0	0	-75.83803047	-3.418150582
1210	ng		0	0	110.5968387	21.6527864
1211	ng		0	0	-66.14033477	2.127364406
1212	ng		0	0	-50.01545214	-26.17825007
1213	ng		0	0	-56.00874838	-6.665090649
1214	ng		0	0	134.8587668	-3.704530176
1215	ng		0	0	83.46071959	26.11882112
1216	ng		0	0	-41.68400658	-15.55307612
1217	ng		0	0	-65.90554868	2.517182385
1218	ng		0	0	-48.48846491	-4.998576809
1219	ng		0	0	-64.78701223	-22.32283947
1220	ng		0	0	11.82197781	-0.893512821
1221	ng		0	0	46.67648619	-19.09083097
1222	ng		0	0	91.74624619	26.0286691
1223	r	tp	100	0	111.2092432	26.33757879
1224	ng		0	0	82.37900896	25.67882681
1225	ng		0	0	12.31425891	2.715632255
1226	ng		0	0	98.31405671	24.59331022
1227	ng		0	0	94.62393013	16.48838005
1228	ng		0	0	-1.953259279	5.379004761
1229	ng		0	0	19.80332153	-0.081023902
1230	ng		0	0	-57.07622945	-3.113113904
1231	ng		0	0	102.6880872	0.598347696
1232	ng		0	0	-61.71289365	-0.14794554
1233	ng		0	0	-9.321934445	6.285712305
1234	ng		0	0	94.75085285	24.54778803
1235	ng		0	0	88.5667004	24.21452529
1236	ng		0	0	101.7069778	21.34481049
1237	ng		0	0	-68.48181459	1.681889562
1238	ng		0	0	-72.91276025	6.40093917
1239	ng		0	0	-53.582948	-26.65549972
1240	ng		0	0	-75.4729175	9.217030329
1241	r	tp	900	0	88.47910409	22.33171441
1242	ng		0	0	-66.34016054	5.41351905
1243	ng		0	0	75.37911073	14.10088023
1244	ng		0	0	97.88906292	15.90344532
1245	ng		0	0	-73.2838088	18.37409042
1246	ng		0	0	96.90150399	25.25756413
1248	ng		0	0	111.9634254	24.58753485
1249	ng		0	0	-55.67610085	-22.92988255
1250	ng		0	0	-73.84737021	-2.0981862
1251	ng		0	0	142.3134893	-6.019765587
1252	ng		0	0	28.67564085	-0.581553223
1253	ng		0	0	-88.55027262	17.00614253
1254	ng		0	0	-46.42628847	-2.422780856
1255	ng		0	0	98.89769484	1.449795362
1256	ng		0	0	-54.6858236	-28.07692588
1257	ng		0	0	-49.85928232	-25.45064329
1258	ng		0	0	111.6928029	-1.529489315
1259	ng		0	0	-46.53991841	-1.88172818
1260	ng		0	0	-64.70782922	-17.24111002
1261	ng		0	0	-74.58059584	-5.415492309
1262	ng		0	0	-55.29591924	-11.67546399
1263	ng		0	0	-84.74872374	10.67839589
1264	ng		0	0	-52.00043467	-1.940079001
1265	ng		0	0	-77.718143	0.563865337
1266	ng		0	0	-74.49156574	-2.953265197
1267	ng		0	0	-74.09520569	-4.879473158
1268	ng		0	0	-60.01906115	-11.50442319
1269	ng		0	0	11.63580083	-1.599909872
1271	ng		0	0	111.0270207	23.81289468
1272	ng		0	0	-49.48375679	-3.41816789
1273	ng		0	0	-64.55455646	-23.49244692
1274	ng		0	0	-63.91806174	0.398096033
1275	ng		0	0	-87.11596514	21.03181107
1276	r	tp	500	0	-50.95724482	-26.65780408
1277	ng		0	0	146.0769372	-18.85482799
1278	ng		0	0	97.84172666	23.45889414
1279	ng		0	0	-63.89322458	-15.83862217
1280	ng		0	0	99.79883533	24.75420445
1281	ng		0	0	-75.42056593	-0.111528654
1282	r	tp	280	0	75.67131737	11.56763253
1283	ng		0	0	112.1173239	-1.8604952
1284	ng		0	0	-1.415722587	5.605509012
1285	ng		0	0	100.9306362	24.47222996
1286	ng		0	0	-62.71678003	-2.212842955
1287	ng		0	0	-62.8736768	-6.753209296
1288	ng		0	0	96.47116034	22.5099547
1289	ng		0	0	142.2252923	-4.515668404
1290	ng		0	0	11.58314173	4.500957681
1291	ng		0	0	-49.38921501	-7.581590052
1292	ng		0	0	87.98468473	25.90078366
1293	ng		0	0	100.3241638	16.77473902
1294	ng		0	0	110.3540969	-2.702798085
1295	r	f	450	0	103.7592774	-3.110529143
1297	ng		0	0	141.8083298	-5.067159281
1298	ng		0	0	115.9948059	-0.434220075
1299	ng		0	0	115.0301984	24.40477646
1300	r	tp	100	0	35.7641737	-8.452457262
1301	ng		0	0	-56.57987684	-7.816830327
1303	ng		0	0	15.99356044	-0.19653405
1304	ng		0	0	81.75261177	19.74436924
1305	ng		0	0	49.00436152	-15.13947552
1306	ng		0	0	-51.46660163	-10.85534776
1307	ng		0	0	-67.42892095	-4.691871709
1308	ng		0	0	27.11294528	1.181520351
1309	ng		0	0	28.91515542	1.874891979
1310	ng		0	0	114.8778543	3.574765598
1311	ng		0	0	-56.36448464	-4.327641539
1312	ng		0	0	106.3242179	24.40534456
1313	ng		0	0	94.4044964	22.41322899
1314	ng		0	0	-67.80953533	-4.793782381
1315	ng		0	0	34.9508508	7.685019556
1316	ng		0	0	-52.27883265	-8.129731802
1317	ng		0	0	141.654987	-4.838842164
1318	r	tp	0	0	112.0492253	29.9143297
1319	ng		0	0	-46.61629733	-1.695261028
1320	ng		0	0	-63.97828919	-2.911631061
1321	ng		0	0	-74.90723271	-7.210608621
1322	r	f	660	0	-55.9649054	-9.566524434
1323	ng		0	0	-59.55123888	0.016976886
1325	ng		0	0	109.8896608	1.121530703
1326	ng		0	0	-68.3762124	4.112184943
1327	ng		0	0	-91.49778735	17.41106595
1328	ng		0	0	83.89284254	25.60053978
1329	ng		0	0	-54.09622943	-23.60437323
1330	ng		0	0	-61.21722704	-8.236814679
1331	ng		0	0	-67.94539022	-14.5654932
1332	ng		0	0	-74.01001311	8.947537299
1333	ng		0	0	-51.81521796	-4.162298679
1334	ng		0	0	96.42382421	17.76219459
1335	ng		0	0	124.7675093	8.243074984
1336	ng		0	0	83.45880429	26.17906602
1337	r	tp	330	0	-49.80167826	-25.46237281
1338	ng		0	0	119.016131	27.85686338
1339	ng		0	0	-51.55275933	-0.848681963
1340	r	tp	223	0	-11.03751147	7.980798954
1341	ng		0	0	117.0825429	4.841999083
1342	ng		0	0	102.284946	21.11853489
1343	ng		0	0	-55.80157862	-10.91584706
1344	ng		0	0	-49.72163236	-27.24713851
1345	ng		0	0	104.1089276	-1.698928958
1346	ng		0	0	-72.55672287	1.480880881
1347	ng		0	0	21.05643494	-3.94091168
1348	ng		0	0	146.3386557	-8.131388389
1349	r	tp	0	1	-39.90628421	-17.59790037
1350	ng		0	0	97.53520034	25.29870897
1351	ng		0	0	-49.84432836	-1.976677707
1352	ng		0	0	-72.27498713	-7.246506474
1353	ng		0	0	101.0472183	17.70044659
1354	ng		0	0	-50.79011838	-8.695348903
1355	ng		0	0	-76.64554164	7.929551163
1356	ng		0	0	-43.96148531	-5.574185167
1357	ng		0	0	-59.50004771	-1.485125456
1358	ng		0	0	-52.99581882	-12.20892961
1359	ng		0	0	-52.48274014	-3.669360332
1360	ng		0	0	28.79641043	-4.831412384
1361	ng		0	0	-35.56332137	-9.156640235
1362	ng		0	0	40.75587498	8.722521899
1363	ng		0	0	36.84069774	8.892753088
1364	ng		0	0	10.3942584	3.939896346
1365	ng		0	0	118.1457176	9.163777548
1366	ng		0	0	114.126477	24.92803829
1367	ng		0	0	134.605799	-6.869255654
1368	ng		0	0	121.5292074	24.16527796
1369	ng		0	0	-67.4695372	-15.98440536
1370	ng		0	0	34.52197709	-21.81687008
1371	ng		0	0	5.750484924	5.875091326
1372	ng		0	0	102.4797893	21.71489732
1373	ng		0	0	-12.67185697	10.96694249
1374	ng		0	0	-59.41894818	-10.99439618
1375	ng		0	0	-67.36646203	-5.620745403
1376	ng		0	0	-53.70292928	-5.847834764
1377	ng		0	0	98.42655365	12.51590377
1378	ng		0	0	98.76500816	19.06543907
1379	ng		0	0	104.6597099	27.69498005
1380	ng		0	0	-73.39902956	-10.06573187
1381	ng		0	0	92.64684317	21.68996917
1382	r	f	0	1	-90.61971447	18.5485464
1383	ng		0	0	-56.92615668	-1.486715317
1384	ng		0	0	133.3195971	-1.426947619
1385	ng		0	0	116.9310906	27.76643302
1386	ng		0	0	-68.93008432	4.114541028
1387	ng		0	0	112.2269966	-7.684472779
1388	ng		0	0	-65.58146917	-26.45755267
1389	ng		0	0	82.60832835	25.5098102
1390	ng		0	0	-73.01434532	1.382545978
1391	ng		0	0	-57.50316271	-9.121286559
1392	ng		0	0	100.5612276	15.6472723
1393	ng		0	0	-50.39324529	2.088028418
1394	ng		0	0	-57.26491253	-2.668625174
1395	ng		0	0	47.76161935	-19.5098228
1396	ng		0	0	88.00861167	22.68964376
1397	ng		0	0	94.43372439	22.79308501
1398	ng		0	0	94.89242208	17.77335024
1399	ng		0	0	-8.678466947	5.913254276
1400	ng		0	0	104.7328538	-0.199969549
1401	ng		0	0	167.1611537	-15.57715734
1402	ng		0	0	-58.66178684	-7.268005437
1403	ng		0	0	-79.603764	-4.874165079
1404	ng		0	0	114.9509815	2.686115531
1405	ng		0	0	99.26225514	22.36770462
1406	r	f	50	0	124.8816316	1.265366893
1407	ng		0	0	-64.30053842	-1.37107314
1408	ng		0	0	-51.9297127	-8.366853721
1409	ng		0	0	-67.07373564	-14.71209621
1410	ng		0	0	-72.89747487	-8.999391451
1411	ng		0	0	16.60663026	-0.788534004
1412	ng		0	0	12.40132824	3.704534683
1413	ng		0	0	-50.61116532	-27.23767388
1414	ng		0	0	18.98181674	0.285548431
1415	r	tp	310	0	103.0032226	5.407392347
1416	ng		0	0	-52.83718592	-4.852383299
1417	ng		0	0	0.806489285	7.408758166
1418	ng		0	0	-79.1747935	-4.508509419
1419	ng		0	0	-72.13515497	-12.9694672
1420	ng		0	0	-74.68841914	-0.442882175
1421	ng		0	0	94.06025167	26.96923688
1422	ng		0	0	-65.13872998	1.205711007
1423	ng		0	0	100.5600978	-0.516179585
1424	ng		0	0	145.4757326	-6.345268993
1425	ng		0	0	-2.948491931	5.681478293
1426	r	tp	0	0	100.2938771	20.37993782
1427	ng		0	0	80.30215258	18.90451113
1428	ng		0	0	99.96802034	13.74748456
1429	ng		0	0	-61.67879136	3.041679964
1430	ng		0	0	133.758472	-3.186310968
1431	ng		0	0	98.10270687	20.10082831
1432	ng		0	0	-70.05711958	-11.68889022
1433	ng		0	0	36.58396472	-7.98257265
1434	ng		0	0	-54.49813067	-25.18169424
1435	ng		0	0	18.8156706	-2.605484092
1436	ng		0	0	-70.36248018	3.678837574
1437	ng		0	0	-56.68846229	0.763776538
1438	ng		0	0	-66.47038363	-15.17080273
1439	ng		0	0	84.57502967	25.87611739
1440	ng		0	0	12.02169215	-4.168321101
1441	ng		0	0	106.5874432	17.50080922
1442	ng		0	0	-51.14322349	-12.10880516
1443	ng		0	0	-50.75531087	-19.19699833
1444	ng		0	0	12.65526026	1.451776032
1445	r	tp	776	0	76.54794801	9.988508571
1446	ng		0	0	165.1994969	-21.23691948
1447	ng		0	0	-69.99901728	-4.201258924
1448	ng		0	0	149.4836233	-9.791742598
1449	ng		0	0	-59.2196314	-1.247539265
1450	ng		0	0	138.684367	-2.485106206
1451	ng		0	0	-61.57794168	2.002383326
1452	ng		0	0	94.09932665	24.52866638
1453	ng		0	0	12.66706266	-0.46175387
1454	ng		0	0	20.69886393	-3.33403382
1455	ng		0	0	138.8914368	-2.586762316
1456	ng		0	0	-65.09028015	-6.646244074
1457	ng		0	0	-66.84982206	-6.703007733
1458	ng		0	0	123.9815593	7.839725136
1459	ng		0	0	-66.48120072	-7.826804789
1460	ng		0	0	-66.60010266	3.343998809
1461	ng		0	0	-69.38660312	-8.322764185
1462	ng		0	0	23.5134307	-1.455404489
1463	ng		0	0	-54.1332247	-3.9537079
1464	ng		0	0	-58.72029706	-7.081055443
1465	ng		0	0	78.40386353	26.05179876
1466	ng		0	0	25.30302314	0.122913134
1467	ng		0	0	143.6835058	-6.250186751
1468	ng		0	0	-49.90490508	-25.35560875
1469	ng		0	0	-58.50124352	0.144014575
1470	ng		0	0	104.7237704	23.18910438
1471	ng		0	0	102.4015406	-2.900636672
1472	ng		0	0	104.7564675	24.7698212
1473	ng		0	0	-72.27352942	-12.75275185
1474	ng		0	0	179.9241607	-16.96981134
1475	ng		0	0	-77.09536406	5.818765495
1476	ng		0	0	80.97381276	17.34170425
1477	ng		0	0	-66.55465159	-3.78471544
1478	ng		0	0	115.7036319	3.610454263
1479	ng		0	0	81.50546324	22.62492013
1480	ng		0	0	108.1430569	24.24250106
1481	ng		0	0	13.44223142	2.295363487
1482	ng		0	0	-55.04505196	-28.1794122
1483	ng		0	0	-96.11040809	18.47799443
1484	ng		0	0	113.3517948	0.128788879
1485	ng		0	0	104.4083987	19.53068223
1486	ng		0	0	-89.7200654	17.27067293
1487	ng		0	0	86.52454897	21.96000422
1488	ng		0	0	99.3724846	13.22336522
1489	ng		0	0	-67.53085103	-1.52512897
1490	ng		0	0	-63.09927373	-8.325414515
1491	ng		0	0	-91.73143161	14.77370058
1492	ng		0	0	-69.35304675	-13.51194517
1493	ng		0	0	-49.7299179	-6.516012636
1494	ng		0	0	-75.24558298	-11.3170168
1495	ng		0	0	111.3174177	0.514990334
1496	ng		0	0	35.90174851	-0.655122834
1497	ng		0	0	-73.54882034	7.653361105
1498	r	f	0	1	25.36105924	3.54092265
1500	ng		0	0	95.69316537	28.15803389
1501	ng		0	0	39.55979756	-9.370550989
1502	ng		0	0	-60.29442609	-3.921243729
1503	ng		0	0	138.1299318	-5.3630456
1504	ng		0	0	-95.84931441	18.07248127
1505	ng		0	0	-61.25179138	-5.988919838
1506	ng		0	0	178.4065067	-17.82660871
1507	r	tp	75	0	115.1877599	-2.846070261
1508	ng		0	0	-76.48131962	7.372369227
1509	ng		0	0	-40.84969363	-18.41564938
1510	ng		0	0	-64.64014549	7.026502212
1511	ng		0	0	12.01327711	7.320365551
1512	ng		0	0	-61.62162378	-3.566974704
1513	r	tp	0	0	101.7402102	0.755421002
1514	r	tp	300	0	118.3505726	5.526521606
1515	ng		0	0	106.3331873	21.6579604
1516	ng		0	0	-49.43935978	-3.617688553
1517	ng		0	0	-62.00962404	-11.41143663
1518	ng		0	0	13.09917095	1.646202026
1519	ng		0	0	-62.10571947	-12.91531245
1520	ng		0	0	106.1827224	21.75497898
1521	ng		0	0	96.46176861	20.78797738
1522	ng		0	0	-40.55812805	-18.33259031
1523	ng		0	0	-73.70647596	1.066216555
1524	ng		0	0	73.82044677	18.04558184
1525	ng		0	0	81.96636083	20.51439766
1526	r	tp	200	0	118.5337761	28.96298847
1527	ng		0	0	48.72837076	-19.15329199
1528	ng		0	0	80.58591597	17.30154522
1529	ng		0	0	37.51048025	5.539534972
1530	ng		0	0	47.95269016	-22.18249759
1531	ng		0	0	131.5494142	-6.756545231
1532	ng		0	0	-62.77025716	-8.539263813
1533	ng		0	0	-66.65158577	-6.414817603
1534	ng		0	0	-56.46424702	-5.311963217
1535	ng		0	0	-51.51809819	-4.292774417
1536	ng		0	0	110.233938	26.28532047
1537	r	f	400	0	-49.55390319	-8.361613461
1539	ng		0	0	-64.44253028	6.830575968
1540	ng		0	0	121.9913023	1.004344871
1541	ng		0	0	11.26330507	6.655046711
1542	ng		0	0	-65.27196535	-13.26899398
1543	ng		0	0	20.86663461	-0.402714783
1544	r	tp	0	0	110.5551995	-1.943498968
1545	ng		0	0	168.0540656	-16.21383303
1546	ng		0	0	96.11559065	24.50307735
1547	ng		0	0	-77.74235249	7.477438154
1548	ng		0	0	78.96274803	29.07917296
1549	ng		0	0	15.92491263	3.374621855
1550	ng		0	0	95.74983676	24.53660388
1551	ng		0	0	-1.154594464	6.990919571
1552	ng		0	0	80.39193808	18.55084433
1553	ng		0	0	-76.11285591	7.140527692
1555	ng		0	0	-56.77220589	-9.757164152
1556	ng		0	0	32.84677643	-26.31621431
1557	ng		0	0	111.7899071	24.74758445
1558	ng		0	0	-56.64421886	0.380242843
1559	ng		0	0	-73.50236217	-8.666984347
1560	ng		0	0	-71.83498231	-3.38327101
1561	ng		0	0	-72.51500286	-13.0675101
1562	ng		0	0	-73.34941933	5.555202834
1563	ng		0	0	19.42538672	-3.349265013
1564	r	f	250	0	95.01763401	17.85031608
1565	ng		0	0	78.37472151	22.23648805
1566	ng		0	0	108.6085954	22.69241975
1567	ng		0	0	-55.60224563	-26.95236948
1568	ng		0	0	-52.20468933	-6.933323319
1569	ng		0	0	-69.9828754	-8.13309966
1570	ng		0	0	-64.60097129	4.031208147
1571	ng		0	0	-65.31881768	0.489305417
1572	ng		0	0	-90.16924704	17.98806667
1573	ng		0	0	37.37787807	8.351013407
1574	ng		0	0	141.1105037	-6.091407236
1575	ng		0	0	-63.63534758	-0.70244071
1577	ng		0	0	100.4138808	22.27281269
1578	ng		0	0	-44.49442194	-19.99460898
1579	ng		0	0	145.032096	-4.678871353
1580	ng		0	0	117.8072452	27.39647193
1581	ng		0	0	-69.65367143	-1.294229144
1582	ng		0	0	-57.04263402	-23.56063421
1583	ng		0	0	40.055005	11.12468799
1585	ng		0	0	114.6163502	-1.60213897
1586	ng		0	0	35.17240055	-22.39225525
1587	ng		0	0	-65.8009257	-7.631284221
1588	ng		0	0	-65.55573341	0.360299923
1589	ng		0	0	-41.41484231	-17.21677568
1590	ng		0	0	97.34646853	26.98350944
1591	ng		0	0	-72.12362616	-4.74739408
1592	ng		0	0	-78.99385913	-7.029449772
1593	ng		0	0	115.5013559	28.86879108
1594	r	tp	100	0	99.51699552	7.859286968
1595	ng		0	0	-52.0787569	-9.818952526
1596	ng		0	0	-77.28087975	0.358633915
1597	r	f	0	0	-72.653315	8.039452016
1598	ng		0	0	-52.45867299	-23.49586131
1599	ng		0	0	11.62984895	-0.369237805
1600	ng		0	0	103.1317842	27.00974204
1601	ng		0	0	46.45377021	-21.96107192
1602	ng		0	0	77.30862195	28.08446591
1603	ng		0	0	121.188877	-2.677235948
1604	ng		0	0	-68.56364582	-2.025920551
1605	r	f	600	0	101.8638592	21.40011089
1606	ng		0	0	101.349297	-1.418982765
1607	ng		0	0	11.89205517	-1.891474946
1608	ng		0	0	139.4055648	-3.611365786
1609	ng		0	0	-61.34069209	0.196423465
1610	ng		0	0	-49.73606149	-2.094889662
1611	ng		0	0	-57.81891766	-2.523609208
1612	ng		0	0	106.1244903	-2.727936245
1613	ng		0	0	-85.71144634	13.43901436
1614	ng		0	0	129.760887	-8.002387269
1615	ng		0	0	-70.62049832	-12.64584977
1616	ng		0	0	-63.50337056	-5.524831138
1617	ng		0	0	-69.00119974	-13.28747524
1618	ng		0	0	93.68120549	25.37207692
1619	ng		0	0	111.8369603	27.10234093
1620	r	tp	870	0	23.07428621	-33.98940277
1621	r	tp	200	0	99.22400479	19.87782076
1622	ng		0	0	-52.17799836	-11.25663575
1623	ng		0	0	-63.97498115	4.030017529
1624	r	tp	100	0	75.78547478	11.39025768
1625	ng		0	0	-56.12201737	-1.47503787
1626	ng		0	0	-10.83085147	6.816591107
1627	ng		0	0	132.1639751	-2.71990813
1628	ng		0	0	-39.93624269	-16.29235093
1629	ng		0	1	-53.07372628	-26.29547816
1630	ng		0	0	-62.37452759	-13.06756776
1631	ng		0	0	-48.87802491	-6.905757602
1632	ng		0	0	-72.88166566	-10.65217327
1633	ng		0	0	-12.06909787	11.44210952
1634	ng		0	0	-68.30877705	-14.23835225
1635	r	tp	175	0	98.47318644	13.4787451
1636	ng		0	0	-64.28508085	-8.138344027
1637	ng		0	0	-66.47058045	-9.488245525
1638	ng		0	0	118.3721033	28.7715959
1639	ng		0	0	139.8361858	-6.511924673
1640	ng		0	0	-41.22475958	-21.08395704
1641	ng		0	0	38.24367453	-7.325198639
1642	ng		0	0	20.71175881	3.700610977
1643	ng		0	0	96.24297239	17.09099243
1644	ng		0	0	93.43961929	23.6601041
1645	ng		0	0	-76.24172289	0.856782108
1646	ng		0	0	-55.48407011	-24.98315536
1647	ng		0	0	134.5332155	-6.089223109
1648	ng		0	0	98.0451846	24.7772449
1649	ng		0	0	78.52930102	18.99245791
1650	ng		0	0	121.6919706	-2.624697612
1651	ng		0	0	-65.78303169	-11.52796636
1652	ng		0	0	8.555515127	3.444540846
1653	r	f	400	0	-55.27878292	-2.605861006
1654	ng		0	0	114.5114129	4.529614926
1655	ng		0	0	25.52676237	0.457629657
1656	ng		0	0	105.5117694	11.73593597
1657	ng		0	0	100.701941	1.889686742
1658	ng		0	0	111.087768	24.91301505
1659	ng		0	0	99.95341675	17.76977993
1660	ng		0	0	97.44337282	21.26923258
1661	ng		0	0	105.1145895	19.83190794
1662	ng		0	0	97.96920537	3.824916526
1663	ng		0	0	-60.49430736	-3.024929468
1664	ng		0	0	120.4838387	27.39039807
1665	ng		0	0	-52.30407963	-5.558547167
1666	r	f	670	0	125.7764168	7.708726837
1667	ng		0	0	-56.09417171	-2.510888489
1668	ng		0	0	-75.75406826	-6.268277388
1669	ng		0	0	111.3515432	23.42736522
1670	ng		0	0	-56.44649128	-0.137852852
1671	ng		0	0	-52.77403596	-2.391579978
1672	ng		0	0	107.6929426	26.51035474
1673	ng		0	0	14.17905014	2.352862824
1674	ng		0	0	-43.91031357	-22.24750712
1675	ng		0	0	103.9365584	-1.909047633
1676	ng		0	0	24.7177561	-3.053289856
1677	ng		0	0	-95.06967725	17.35098356
1678	ng		0	0	-71.07265944	-2.863680464
1679	ng		0	0	103.6957276	27.04342621
1680	ng		0	0	10.83648369	4.209922459
1681	ng		0	0	-87.01851562	13.73357511
1682	ng		0	0	-70.45280305	2.227603395
1683	ng		0	0	116.03125	25.15967148
1684	ng		0	0	116.637179	-1.068214865
1685	ng		0	0	112.97095	24.44211183
1686	ng		0	0	140.2700972	-5.741990074
1687	ng		0	0	-69.15665005	-10.52489733
1688	ng		0	0	-41.64723988	-16.31553604
1689	ng		0	0	140.6915088	-7.018526287
1690	ng		0	0	78.88887846	28.62190318
1691	ng		0	0	95.22849919	27.05135907
1692	ng		0	0	91.27300232	24.72068509
1693	ng		0	0	-71.01700794	1.60192474
1694	ng		0	0	140.4394932	-6.726617077
1695	ng		0	0	-47.43228742	-21.80884359
1696	r	f	0	0	-47.13103877	-23.57658701
1697	ng		0	0	-67.25696036	-2.932253222
1698	ng		0	0	-35.97440105	-8.753720088
1699	ng		0	0	29.0794318	-0.704918326
1700	r	f	15	1	-89.35967586	18.22777368
1701	ng		0	0	144.6250424	-5.534743557
1702	ng		0	0	-59.46983308	-4.297223358
1703	ng		0	0	19.26723312	2.625605745
1704	ng		0	0	103.7012799	-4.946616639
1705	ng		0	0	-77.47780614	8.38361318
1706	r	f	0	0	73.16018885	20.18078826
1707	ng		0	0	-11.7014026	8.237563548
1708	ng		0	0	116.5160095	2.226175219
1709	ng		0	0	-64.60693426	-2.318368682
1710	ng		0	0	-71.88463929	-8.697017047
1711	r	f	150	0	99.2826248	15.44739799
1712	r	tp	0	0	117.0753903	23.94362526
1713	ng		0	0	-67.25549814	-9.695209273
1714	ng		0	0	-39.94504187	-18.70242363
1715	ng		0	0	-42.38862526	-4.835679188
1716	ng		0	0	-66.23197373	-5.584958551
1717	ng		0	0	-91.41862486	16.14591527
1718	ng		0	0	11.02707233	-3.02946438
1719	ng		0	0	-77.44279806	-3.079866308
1720	ng		0	0	23.82381799	-2.107442876
1721	ng		0	0	133.2090717	-3.124395938
1722	ng		0	0	-5.835817739	6.130966414
1724	ng		0	0	82.25211603	26.49525969
1725	ng		0	0	82.50281743	27.32997133
1726	ng		0	0	-63.55589113	4.585023609
1727	ng		0	0	-70.43015717	-7.387184541
1729	ng		0	0	85.8226701	26.15752521
1730	ng		0	0	81.32686389	20.34354795
1731	ng		0	0	113.2167198	0.837440604
1732	ng		0	0	29.67792068	2.523089244
1733	ng		0	0	19.39083251	0.61899453
1734	ng		0	0	-45.17959022	-20.17636447
1735	ng		0	0	-73.98236938	0.464364922
1736	ng		0	0	120.7701943	17.73314685
1737	ng		0	0	81.76644879	27.35588648
1738	ng		0	0	112.6306794	1.671886003
1739	ng		0	0	9.758256243	-0.142103405
1740	ng		0	0	-71.43519929	2.657064379
1741	ng		0	0	-50.10380696	-4.952778721
1742	ng		0	0	17.07110468	3.758440618
1743	ng		0	0	102.5153811	-0.88604824
1744	ng		0	0	48.71112719	-14.11467773
1745	ng		0	0	29.6709415	-1.321797058
1746	r	tp	100	0	146.7189139	-7.296804443
1747	ng		0	0	-56.82976302	-0.526057479
1749	ng		0	0	-70.74426092	10.15022793
1750	ng		0	0	-59.07210256	-2.213156174
1751	ng		0	0	-44.00293889	-3.141523581
1752	ng		0	0	143.0969184	-7.608623514
1753	ng		0	0	-50.73107951	2.304680438
1754	ng		0	0	119.9885135	-3.511271919
1755	ng		0	0	34.47745911	1.078860369
1756	ng		0	0	105.3178115	27.54478956
1757	ng		0	0	117.934602	27.43493259
1758	ng		0	0	-54.7173303	-23.81317772
1759	ng		0	0	-40.42418145	-19.9895585
1760	ng		0	0	86.56536563	20.48116303
1761	ng		0	0	178.4983937	-17.81156957
1762	ng		0	0	100.5703321	22.75049674
1763	ng		0	0	110.401769	30.16897121
1764	ng		0	0	-78.41546081	-5.115673423
1765	ng		0	0	-98.8754693	23.01244553
1766	ng		0	0	-76.68133476	-4.907764438
1767	r	f	100	0	99.50769241	0.379554156
1768	ng		0	0	104.5888551	23.93876117
1769	ng		0	0	-40.43343975	-20.38582079
1770	ng		0	0	-68.24243643	3.47098522
1771	ng		0	0	-65.24639282	-6.361409349
1772	ng		0	0	-65.84211411	3.462148949
1773	ng		0	0	48.81661218	-18.85922648
1774	ng		0	0	-51.06201342	-8.82579363
1775	ng		0	0	-66.73309957	-3.790849223
1776	ng		0	0	-65.36523712	5.119258708
1777	ng		0	0	-66.77194861	-11.49155783
1778	ng		0	0	-67.00391291	1.050467533
1779	r	tp	260	0	76.70335409	9.884986024
1780	ng		0	0	99.46508482	25.12321455
1781	ng		0	0	-51.72752908	-4.006166017
1782	ng		0	0	-54.3774058	-2.34947951
1783	ng		0	0	-63.53654583	-10.51206692
1784	ng		0	0	14.70586626	2.539962484
1785	ng		0	0	102.5879258	22.61709565
1786	ng		0	0	-53.81638622	-6.895834162
1787	ng		0	0	-52.49854559	-0.889692436
1788	ng		0	0	-62.00735177	-3.477981393
1789	ng		0	0	90.20842958	26.12303805
1790	ng		0	0	139.2264098	-2.716042773
1791	ng		0	0	-47.99712663	-3.572372225
1792	ng		0	0	42.13021452	0.558136936
1793	ng		0	0	-84.72655957	10.31582799
1794	ng		0	0	-74.19684613	-6.358265604
1795	ng		0	0	13.594453	1.973116913
1796	ng		0	0	100.5981459	-0.870685184
1797	ng		0	0	-76.84433338	-1.348002368
1798	ng		0	0	35.56092554	-0.404365346
1799	ng		0	0	-48.29017922	-10.58321816
1800	ng		0	0	114.2855254	-2.879358609
1801	ng		0	0	-62.94813603	-13.14594995
1802	ng		0	0	144.3007074	-6.146996536
1803	ng		0	0	28.02626705	-3.635622774
1804	ng		0	0	97.39597698	23.8951461
1805	ng		0	0	-56.01786879	0.450934018
1806	ng		0	0	-66.97685668	-6.472889326
1807	ng		0	0	-65.42579361	6.668481398
1808	ng		0	0	-62.70465046	-13.81634935
1809	ng		0	0	110.5752592	23.75907459
1810	ng		0	0	105.288538	28.00636087
1811	ng		0	0	20.08158628	-0.860544391
1812	ng		0	0	139.2658265	-5.913466573
1813	ng		0	0	-77.25480942	-2.25983195
1814	ng		0	0	-63.92712214	-12.23487722
1816	r	tp	0	0	112.5926408	-1.905911391
1817	ng		0	0	-61.86017448	-12.3771531
1818	ng		0	0	-74.23112069	-7.379917985
1819	ng		0	0	-78.67992218	-0.002529008
1820	ng		0	0	-68.33572709	-15.24183365
1821	ng		0	0	106.2883628	20.25033612
1822	ng		0	0	-74.13285016	-9.281243032
1823	ng		0	0	-61.25661999	-9.834634221
1824	ng		0	0	105.5473076	21.18133599
1825	ng		0	0	-52.5442674	-28.40212628
1826	ng		0	0	-66.05924062	1.412003394
1827	ng		0	0	-72.36077207	-8.154997729
1828	ng		0	0	-55.51535532	-0.940542123
1829	ng		0	0	138.8333197	-8.301318584
1830	ng		0	0	85.62444033	20.14254722
1831	ng		0	0	-75.34569216	1.138732289
1832	ng		0	0	-57.32722698	-3.263881406
1833	ng		0	0	-83.5272213	10.04732501
1834	ng		0	0	-9.644261981	7.837692166
1835	ng		0	0	106.2075979	27.34767702
1836	ng		0	0	118.8526174	5.239257512
1837	ng		0	0	-71.60711268	-3.689814845
1838	ng		0	0	-58.67404736	-1.515393244
1839	ng		0	0	145.2177433	-6.486268751
1840	ng		0	0	-52.94917684	-26.48070104
1841	ng		0	0	28.04657699	2.648282589
1842	ng		0	0	99.84599028	15.2525963
1843	r	tp	250	0	118.0274611	4.319480462
1844	ng		0	0	11.79362338	1.996807937
1845	ng		0	0	115.1043287	1.286274444
1846	ng		0	0	-6.889485448	6.635760797
1847	ng		0	0	-57.3658681	-5.496434456
1848	ng		0	0	-78.27190259	-6.005994453
1849	ng		0	0	9.157528798	-0.923718628
1850	ng		0	0	-66.13140225	1.190227423
1851	ng		0	0	-74.6280736	-8.521254566
1852	ng		0	0	-40.7755154	-15.79049208
1853	ng		0	0	-60.72211144	-3.129809234
1854	ng		0	0	40.14502276	-15.07321346
1855	ng		0	0	-56.30406029	-9.09994625
1856	ng		0	0	-79.03821651	-5.830909395
1857	ng		0	0	25.0377465	-1.892940644
1858	ng		0	0	-72.20123479	6.774460156
1859	ng		0	0	100.937488	-1.174178735
1860	ng		0	0	10.43240183	-1.789185061
1861	ng		0	0	28.57656138	-1.818402559
1862	r	f	200	0	122.0503391	12.56250686
1864	ng		0	0	-73.55120755	0.31475198
1865	ng		0	0	115.342664	-2.383918264
1866	ng		0	0	12.54739455	2.49751559
1867	ng		0	0	23.57872402	-1.674078086
1868	ng		0	0	114.1481915	-8.331609107
1869	ng		0	0	145.4352623	-7.283999103
1870	ng		0	0	103.2839534	22.07525712
1871	ng		0	0	30.22974624	-30.37298722
1872	ng		0	0	101.1734537	-0.477413157
1873	ng		0	0	-51.81754072	-7.355556592
1874	ng		0	0	-40.88472529	-19.1548593
1875	ng		0	0	-49.71397893	-0.086087141
1876	ng		0	0	-77.01726057	-2.527036398
1877	r	tp	0	0	-50.32897325	-26.93961407
1878	ng		0	0	111.675171	1.88578737
1879	ng		0	0	-74.38163998	-4.189338901
1880	ng		0	0	-46.34312544	-21.2650615
1881	ng		0	0	-1.520113868	6.189188245
1882	ng		0	0	-68.06328897	0.440471728
1883	r	tp	0	1	101.3073803	1.239912549
1884	ng		0	0	15.75097844	3.459141872
1885	ng		0	0	-74.53725702	1.309038896
1886	r	tp	60	0	110.1259157	0.331318051
1887	ng		0	0	-55.60281105	-7.284470495
1888	ng		0	0	35.33447311	-23.31662002
1889	ng		0	0	-69.22612821	-4.941928326
1890	ng		0	0	-50.23790303	-20.34598316
1891	ng		0	0	20.44781892	2.045463156
1892	ng		0	0	37.48729142	7.679054804
1893	ng		0	0	108.716045	-6.887841092
1895	ng		0	0	29.30501801	-0.976710288
1896	ng		0	0	-50.65904432	-18.88113011
1897	ng		0	0	82.56093166	21.2052309
1898	ng		0	1	94.46599685	26.8070161
1899	ng		0	0	138.437072	-6.17029982
1900	ng		0	0	137.9342194	-2.783464389
1901	ng		0	0	107.2944079	16.31089348
1902	ng		0	0	21.84572714	3.700273261
1903	r	f	150	0	-48.47299651	-10.67757716
1904	ng		0	0	-75.29574555	-10.15541081
1905	r	tp	50	0	101.5140347	13.47340537
1906	r	tp	15	0	115.67751	27.29009704
1907	ng		0	0	-41.58312352	-17.28904589
1908	ng		0	0	-60.70644849	-1.564583756
1909	ng		0	0	79.27921026	22.71785818
1910	ng		0	0	22.13774618	-2.7800079
1911	ng		0	0	-52.11980118	-4.205225749
1912	ng		0	0	82.06812601	22.75992255
1913	ng		0	0	128.3506045	0.636504824
1914	ng		0	0	-53.5347807	-28.16998011
1915	r	f	0	0	-48.47574945	-5.633731312
1916	ng		0	0	-76.49687288	2.817646318
1917	ng		0	0	-63.72902843	-3.561146627
1918	ng		0	0	45.86973924	-21.15578864
1919	ng		0	0	-51.48749816	-23.02885327
1920	ng		0	0	22.90564171	-2.659326435
1921	ng		0	0	29.59450703	-3.404170583
1922	ng		0	0	-56.79399274	-6.398810653
1923	ng		0	0	39.35040895	5.96933512
1925	ng		0	0	138.5361533	-3.725175958
1926	ng		0	0	99.09363823	2.942611874
1927	ng		0	0	20.70000112	-3.731427941
1928	ng		0	0	-64.2337208	10.00302568
1929	ng		0	0	-74.26556478	3.079020647
1930	ng		0	0	103.1927575	11.64789308
1931	ng		0	0	118.4345296	27.7389169
1932	ng		0	0	100.3173116	25.6356755
1933	ng		0	0	26.55054359	2.204070725
1934	ng		0	0	-54.91552754	-9.118043653
1935	ng		0	0	-51.697825	-21.65558191
1936	ng		0	0	-53.37690774	-6.395090838
1937	ng		0	0	-51.30730965	-10.60160836
1938	ng		0	0	102.3353326	4.898332953
1939	ng		0	0	108.9048884	19.40859998
1940	ng		0	0	88.34073361	22.73111459
1941	ng		0	0	88.25917427	24.09115001
1942	ng		0	0	-58.70247714	1.188261212
1943	ng		0	0	106.9916336	21.74092773
1944	ng		0	0	-48.97768752	-24.40058403
1945	ng		0	0	-53.09321382	-10.1207169
1946	ng		0	0	-52.85342816	-8.923538968
1947	ng		0	0	100.3268774	15.03644735
1948	ng		0	0	89.0257394	26.60986648
1949	ng		0	0	-51.38291131	-11.96475339
1950	ng		0	0	-64.88082271	-10.48852397
1951	ng		0	0	-54.57131842	-12.21426073
1952	r	tp	0	0	109.2899528	19.16844363
1953	ng		0	0	-74.07468946	-5.018771719
1954	ng		0	0	-57.84138393	-9.147233048
1955	ng		0	0	24.49632199	2.699954357
1956	ng		0	0	-64.26877107	-0.69305291
1957	ng		0	0	-69.4784668	-1.369510057
1958	ng		0	0	135.9110342	-3.122777885
1959	ng		0	0	47.83686145	-21.84121095
1960	ng		0	0	-71.88625941	0.281907185
1961	ng		0	0	33.59543149	4.207786227
1962	ng		0	0	-66.25642602	-8.204438151
1963	ng		0	0	-69.46613284	-10.15809604
1964	ng		0	0	-95.25938095	17.51399638
1965	ng		0	0	101.761331	20.34953002
1966	ng		0	0	108.4348489	24.9304662
1967	ng		0	0	-60.54573366	0.929823338
1968	ng		0	0	97.54754653	20.81764762
1969	ng		0	0	-63.98997746	1.111868531
1970	ng		0	0	10.77663993	3.027401689
1971	ng		0	0	11.74843205	2.817641276
1972	ng		0	0	17.37623396	0.247324198
1973	ng		0	0	142.3338874	-4.083833187
1974	ng		0	0	-73.92257846	-4.373378404
1975	r	f	0	0	-74.11456528	3.334596057
1976	ng		0	0	35.33383663	-22.78102822
1977	ng		0	0	-40.74263325	-17.33633909
1978	r	f	500	0	-42.12144713	-3.414857745
1979	ng		0	0	10.77130604	2.94972241
1980	r	tp	0	1	101.4121895	0.870463664
1981	ng		0	0	101.2760577	12.94366208
1982	ng		0	0	24.48127931	-1.226741352
1983	ng		0	0	106.224151	22.9619765
1984	ng		0	0	-78.67619516	-7.173436464
1985	ng		0	0	94.85915208	18.54235394
1986	ng		0	0	-52.91458097	-11.21990962
1987	ng		0	0	121.8972203	-3.707146325
1988	ng		0	0	101.5067864	26.28683586
1989	ng		0	0	113.8554322	0.179903183
1990	ng		0	0	-68.75148221	2.042653254
1991	ng		0	0	24.06247143	-3.630382963
1992	ng		0	0	-95.56718691	17.82705448
1993	ng		0	0	-68.33887501	-2.742576899
1994	ng		0	0	117.1478121	2.948888459
1996	ng		0	0	97.20685548	4.232721741
1997	ng		0	0	23.74128064	-0.727401694
1998	ng		0	0	10.87002801	1.851087906
1999	r	f	700	0	-68.97993777	-14.02976216
2000	ng		0	0	-41.42374001	-19.20090942
2001	ng		0	0	107.1796032	20.93575406
2002	ng		0	0	-75.59875677	5.208341221
2003	ng		0	0	13.51183322	1.927850874
2004	ng		0	0	14.40095861	2.074380346
2005	ng		0	0	142.0157284	-8.232907247
2006	ng		0	0	86.38684962	25.69679044
2007	ng		0	0	-89.54661451	18.72309045
2008	ng		0	0	-63.21695945	-0.72574886
2009	ng		0	0	-78.37187829	-3.719336376
2010	ng		0	0	-60.66896905	-1.343114827
2011	r	tp	980	0	118.8548317	5.179751344
2012	ng		0	0	17.68638696	3.9098662
2013	ng		0	0	81.44347003	18.61803949
2014	ng		0	0	19.08528	-1.940188735
2015	ng		0	0	15.46644877	0.081676479
2016	r	f	953	0	102.9846479	19.84411523
2017	ng		0	0	-64.09626001	-10.47123344
2018	ng		0	0	-53.29065028	-11.00590919
2019	ng		0	0	133.0843604	-1.113517965
2020	ng		0	0	-62.27391135	4.110501987
2021	ng		0	0	-54.42964236	-10.36630144
2022	ng		0	0	-66.01351179	5.189166068
2023	r	f	760	0	97.60411784	3.730726489
2024	ng		0	0	48.0658482	-16.08675932
2025	ng		0	0	-48.09552816	-25.20347527
2026	ng		0	0	-49.70574169	-8.067496431
2027	ng		0	0	-62.09305578	-10.59768901
2028	ng		0	0	-51.89120341	-30.03733594
2029	ng		0	0	37.36021547	13.13885365
2030	ng		0	0	100.8943328	17.99839117
2031	ng		0	0	-49.951272	-5.497392616
2032	ng		0	0	-53.17077964	0.216919429
2033	ng		0	0	22.2414041	5.380262815
2034	r	f	350	0	101.3125917	5.241830976
2035	ng		0	0	124.6158374	7.96181781
2036	ng		0	0	-69.89158889	-10.03600206
2037	ng		0	0	-75.84195989	20.47542144
2038	ng		0	0	123.7855103	13.00688666
2039	r	f	560	0	-49.32316349	-25.02648328
2040	ng		0	0	97.72143097	19.64402778
2041	ng		0	0	23.10366488	0.710160521
2042	ng		0	0	-69.4614787	-12.32928691
2043	ng		0	0	40.39975904	-2.333895971
2044	ng		0	0	142.9152797	-4.885578539
2045	ng		0	0	105.1034074	17.1348092
2046	ng		0	0	-71.74603228	-14.25615211
2047	ng		0	0	100.7169028	20.79341707
2048	ng		0	0	127.8713837	-0.261825734
[truncated: 1,001 more rows]
